# Supplementary material for: Influence of Risk Factors for Male Infertility on Sperm Protein Composition
Source: Int J Mol Sci. 2021 Dec 6;22(23):13164. doi: 10.3390/ijms222313164 (PMC8658491; doi:10.3390/ijms222313164)
Supplement: Supplementary file 1 [file ijms-22-13164-s001.zip]

Archive with 4 entries (4 files):
- Supplementary information.pdf
- Table S1 revised.xlsx
- Table S2 revised.xlsx
- Table S3.xlsx
