# Supplementary material for: Influence of Risk Factors for Male Infertility on Sperm Protein Composition
Source: Int J Mol Sci. 2021 Dec 6;22(23):13164. doi: 10.3390/ijms222313164 (PMC8658491; doi:10.3390/ijms222313164)
Supplement: Supplementary file 1 [file ijms-22-13164-s001.zip › Table S1 revised.xlsx]

## Sheet: Table S1
Table S1. List of all deregulated proteins identified in the studies investigating protein changes in relation to male infertility risk factors cited in this review
Obesity
References	Species	Working sample	Protein namea	Gene name	Uniprot KB accession numberb	Protein variationc
Kriegel et al. 2009 [36]	Human	Progressive spermatozoa	Fibrinogen-like 1 precursor	FGL1 HFREP1	Q08830	Down
			Glutathione S-transferase omega-2	GSTO2	Q9H4Y5	Down
			Lysozyme-like protein 1 precursor	LYZL1 LYC2 UNQ648/PRO1278	Q6UWQ5	Down
			Semenogelin-1 preproprotein	SEMG1 SEMG	P04279	Down
			Semenogelin-2	SEMG2	Q02383	Down
			Chromosome 9 open reading frame 24 (renamed as Spermatid-specific manchette-related protein 1)	SMRP1 C9orf24 CBE1	Q8NCR6	Down
			Outer dense fiber protein 1	ODF1 HSPB10 ODFP	Q14990	Down, Up
			Glyceraldehyde-3-phosphate dehydrogenase, testis-specific	GAPDHS GAPD2 GAPDH2 GAPDS HSD-35 HSD35	O14556	Up
			Glycerol kinase 3, testis specific 1	GK3P GKP3 GKTB	Q14409	Up
Paasch et al. 2011 [40]	Human	Progressive spermatozoa	Actin, cytoplasmic 1	ACTB	P60709	Down
			Actin, cytoplasmic 2	ACTG1 ACTG	P63261	Down
			Clusterin	CLU APOJ CLI KUB1 AAG4	P10909	Down
			Lactotransferrin	LTF GIG12 LF	P02788	Down
			Prolactin-inducible protein	PIP GCDFP15 GPIP4	P12273	Down
			Semenogelin-1	SEMG1 SEMG	P04279	Down
			Beta-galactosidase-1-like protein	GLB1L UNQ229/PRO262	Q6UWU2	Up
Leisegang et al. 2014 [79]	Human	Seminal plasma	Insulin	INS	P01308	Up
			Leptin	LEP OB OBS	P41159	Up
Shi et al. 2014 [59]	Human	Spermatozoa	Protein-tyrosine Phosphatase 1B (renamed as Tyrosine-protein phosphatase non-receptor type 1)	PTPN1 PTP1B	P18031	Up
	Mouse	Spermatozoa	Protein-tyrosine Phosphatase 1B (renamed as Tyrosine-protein phosphatase non-receptor type 1)	Ptpn1	P35821	Up
Liu et al. 2015 [43]	Human	Spermatozoa	14 kDa phosphohistidine phosphatase	PHPT1 PHP14 CGI-202 HSPC141	Q9NRX4	Down
			19 kDa protein (renamed as 60S ribosomal protein L24 (60S ribosomal protein L30))	RPL24	P83731	Down
			24 kDa protein (renamed as Transgelin-2 (Epididymis tissue protein Li 7e))	TAGLN2 KIAA0120 CDABP0035	P37802	Down
			26 kDa protein (renamed as Glutathione S-transferase Mu 2)	GSTM2 GST4	P28161	Down
			40S ribosomal protein S13	RPS13	P62277	Down
			40S ribosomal protein S3a	RPS3A FTE1 MFTL	P61247	Down
			40S ribosomal protein S6	RPS6 OK/SW-cl.2	P62753	Down
			40S ribosomal protein S9	RPS9	P46781	Down
			45 kDa protein	N/A	N/A	Down
			60S ribosomal protein L17	RPL17	P18621	Down
			Actin-related protein T2	ACTRT2 ARPM2	Q8TDY3	Down
			Adenine phosphoribosyltransferase	APRT	P07741	Down
			Aldehyde oxidase	AOX1 AO	Q06278	Down
			Aldose reductase (renamed as Aldo-keto reductase family 1 member B1)	AKR1B1 ALDR1 ALR2	P15121	Down
			Alpha-crystallin B chain	CRYAB CRYA2 HSPB5	P02511	Down
			Brain protein 44 (renamed as Mitochondrial pyruvate carrier 2)	MPC2 BRP44	O95563	Down
			BTB/POZ domain-containing protein KCTD14	KCTD14	Q9BQ13	Down
			Calicin	CCIN	Q13939	Down
			Carbonyl reductase [NADPH] 3	CBR3	O75828	Down
			Carboxymethylenebutenolidase homolog	CMBL	Q96DG6	Down
			Cathepsin D	CTSD CPSD	P07339	Down
			cDNA FLJ34642 fis, clone KIDNE2016918, highly similar to UROMODULIN (renamed as Uromodulin)	UMOD	P07911	Down
			cDNA FLJ60094, highly similar to F-actin capping protein subunit beta (renamed as F-actin-capping protein subunit beta)	CAPZB hCG_41078	B1AK88	Down
			Coatomer subunit beta'	COPB2	P35606	Down
			Coatomer subunit gamma-1	COPG1 COPG	Q9Y678	Down
			Coatomer subunit zeta-1	COPZ1 COPZ CGI-120 HSPC181	P61923	Down
			Cylicin-1	CYLC1 CYL CYL1	P35663	Down
			Cytochrome c oxidase subunit 5A, mitochondrial	COX5A	P20674	Down
			Cytoplasmic aconitate hydratase	ACO1 IREB1	P21399	Down
			D-3-phosphoglycerate dehydrogenase	PHGDH PGDH3	O43175	Down
			Dolichyl-diphosphooligosaccharide--protein glycosyltransferase subunit 1	RPN1	P04843	Down
			Dynactin 2 (renamed as Dynactin subunit 2)	DCTN2 DCTN50	Q13561	Down
			Electron transfer flavoprotein-ubiquinone oxidoreductase, mitochondrial	ETFDH	Q16134	Down
			Elongation factor 1-alpha 1	EEF1A1 EEF1A EF1A LENG7	P68104	Down
			Endoplasmic reticulum protein ERp29 (renamed as Endoplasmic reticulum resident protein 29)	ERP29 C12orf8 ERP28	P30040	Down
			Epoxide hydrolase 1	EPHX1 EPHX EPOX	P07099	Down
			FAM75-like protein C9orf79 (renamed as Spermatogenesis-associated protein 31E1)	SPATA31E1 C9orf79 FAM75E1	Q6ZUB1	Down
			FK506-binding protein 5	FKBP5 AIG6 FKBP51	Q13451	Down
			Fructose-bisphosphate aldolase C	ALDOC ALDC	P09972	Down
			Glyceraldehyde-3-phosphate dehydrogenase, testis-specific	GAPDHS GAPD2 GAPDH2 GAPDS HSD-35 HSD35	O14556	Down
			Glyoxylate reductase/hydroxypyruvate reductase	GRHPR GLXR MSTP035	Q9UBQ7	Down
			Guanine nucleotide-binding protein G(I)/G(S)/G(T) subunit beta-2	GNB2	P62879	Down
			hypothetical protein LOC284418 (renamed as Protein FAM71E2)	FAM71E2 C19orf16	Q8N5Q1	Down
			hypothetical protein LOC84226 (renamed as C2orf16 protein (Fragment))	C2orf16	A4QMX9	Down
			Integral membrane protein 2B	ITM2B BRI BRI2	Q9Y287	Down
			Integrin-linked protein kinase	ILK ILK1 ILK2	Q13418	Down
			Interferon-inducible GTPase 5	IRGC IIGP5 IRGC1	Q6NXR0	Down
			Isoform 1 of Abhydrolase domain-containing protein 14B	ABHD14B CIB	Q96IU4-1	Down
			Isoform 1 of Alpha-1,3-mannosyltransferase ALG2	ALG2 UNQ666/PRO1298	Q9H553-1	Down
			Isoform 1 of CCR4-NOT transcription complex subunit 1	CNOT1 CDC39 KIAA1007 NOT1 AD-005	A5YKK6-1	Down
			Isoform 1 of Cytoskeleton-associated protein 4	CKAP4	Q07065-1	Down
			Isoform 1 of Cytosolic Fe-S cluster assembly factor NUBP1	NUBP1 NBP NBP1	P53384-1	Down
			Isoform 1 of Dynein heavy chain 3, axonemal	DNAH3 DNAHC3B	Q8TD57-1	Down
			Isoform 1 of E3 ubiquitin-protein ligase RNF138	RNF138 NARF HSD-4 HSD4	Q8WVD3-1	Down
			Isoform 1 of Elongator complex protein 3	ELP3	Q9H9T3-1	Down
			Isoform 1 of Endoplasmic reticulum-Golgi intermediate compartment protein 1	ERGIC1 ERGIC32 KIAA1181 HT034	Q969X5-1	Down
			Isoform 1 of Erlin-2	ERLIN2 C8orf2 SPFH2 UNQ2441/PRO5003/PRO9924	O94905-1	Down
			Isoform 1 of Heat shock cognate 71 kDa protein	HSPA8 HSC70 HSP73 HSPA10	P11142-1	Down
			Isoform 1 of Lambda-crystallin homolog	CRYL1 CRY	Q9Y2S2-1	Down
			Isoform 1 of LETM1 and EF-hand domain-containing protein 1, mitochondrial (renamed as Mitochondrial proton/calcium exchanger protein)	LETM1	O95202-1	Down
			Isoform 1 of Myosin-9	MYH9	P35579-1	Down
			Isoform 1 of Nephronectin	NPNT EGFL6L POEM UNQ295/PRO334	Q6UXI9-1	Down
			Isoform 1 of Pyruvate dehydrogenase E1 component subunit beta, mitochondrial	PDHB PHE1B	P11177-1	Down
			Isoform 1 of Serine/threonine-protein kinase TAO1	TAOK1 KIAA1361 MAP3K16 MARKK	Q7L7X3-1	Down
			Isoform 1 of Tomoregulin-2	TMEFF2 HPP1 TENB2 TPEF UNQ178/PRO204	Q9UIK5-1	Down
			Isoform 1 of Uncharacterized protein C1orf194 (renamed as Protein C1orf194)	C1orf194	Q5T5A4-1	Down
			Isoform 2 of Fatty aldehyde dehydrogenase (renamed as Aldehyde dehydrogenase family 3 member A2)	ALDH3A2 ALDH10 FALDH	P51648-2	Down
			Isoform 2 of Mannose-1-phosphate guanyltransferase beta	GMPPB	Q9Y5P6-2	Down
			Isoform 2 of Polyamine-modulated factor 1-binding protein 1	PMFBP1	Q8TBY8-2	Down
			Isoform 2 of Septin-2	SEPTIN2 DIFF6 KIAA0158 NEDD5 SEPT2	Q15019-2	Down
			Isoform B of Annexin A13	ANXA13 ANX13	P27216-2	Down
			Isoform Complexed of Arginyl-tRNA synthetase, cytoplasmic (renamed as Arginine--tRNA ligase, cytoplasmic (Arginyl-tRNA synthetase))	RARS1 RARS	P54136-1	Down
			KIAA1683 isoform a (renamed as IQ domain-containing protein N)	IQCN KIAA1683	Q9H0B3	Down
			Kinesin-1 heavy chain	KIF5B KNS KNS1	P33176	Down
			Macrophage-capping protein	CAPG AFCP MCP	P40121	Down
			Methyltransferase-like protein 7A	METTL7A PRO0066 UNQ1902/PRO4348	Q9H8H3	Down
			Nucleosome assembly protein 1-like 1	NAP1L1 NRP	P55209	Down
			Phospholipase A2, membrane associated	PLA2G2A PLA2B PLA2L RASF-A	P14555	Down
			Poly(rC) binding protein 2 isoform a (renamed as Poly(rC)-binding protein 2)	PCBP2	Q15366	Down
			Proteasome 26S non-ATPase subunit 8 (renamed as 26S proteasome non-ATPase regulatory subunit 8)	PSMD8	P48556	Down
			Proteasome subunit beta type-2	PSMB2	P49721	Down
			Proteasome subunit beta type-6	PSMB6 LMPY Y	P28072	Down
			Protein disulfide-isomerase A3	PDIA3 ERP57 ERP60 GRP58	P30101	Down
			Protein transport protein Sec61 subunit beta	SEC61B	P60468	Down
			Putative adenosylhomocysteinase 3 (renamed as Adenosylhomocysteinase 3)	AHCYL2 KIAA0828	Q96HN2	Down
			Putative FAM75-like protein FLJ44082 (renamed as Spermatogenesis-associated protein 31D3)	SPATA31D3 FAM75D3	P0C874	Down
			Putative uncharacterized protein APOD (renamed as Apolipoprotein D (Fragment))	APOD	C9JF17	Down
			Putative uncharacterized protein ATP2A3 (renamed as Sarcoplasmic/endoplasmic reticulum calcium ATPase 3)	ATP2A3	Q93084-6	Down
			Putative uncharacterized protein DKFZp686M24262 (renamed as Medium-chain specific acyl-CoA dehydrogenase, mitochondrial)	DKFZp686M24262	Q5HYG7	Down
			Putative uncharacterized protein PITRM1 (renamed as Presequence protease, mitochondrial)	PITRM1 KIAA1104 MP1 PREP	Q5JRX3-1	Down
			Rho GTPase-activating protein 1	ARHGAP1 CDC42GAP RHOGAP1	Q07960	Down
			Rhophilin-2	RHPN2	Q8IUC4	Down
			Ribosomal protein L10 (Fragment)	N/A	Q5HY50.1	Down
			Ribosomal protein S6 kinase alpha-3	RPS6KA3 ISPK1 MAPKAPK1B RSK2	P51812	Down
			small inducible cytokine subfamily E, member 1 isoform b precursor (renamed as Aminoacyl tRNA synthase complex-interacting multifunctional protein 1	AIMP1 EMAP2 SCYE1	Q12904	Down
			Tektin-5	TEKT5	Q96M29	Down
			Testis-expressed sequence 15 protein (renamed as Testis-expressed protein 15 (Cancer/testis antigen 42))	TEX15	Q9BXT5	Down
			Thioredoxin domain-containing protein 17	TXNDC17 TXNL5	Q9BRA2	Down
			Transforming protein RhoA	RHOA ARH12 ARHA RHO12	P61586	Down
			Translocation protein SEC62	SEC62 TLOC1	Q99442	Down
			Transmembrane and coiled-coil domain-containing protein 2	TMCO2	Q7Z6W1	Down
			Transmembrane emp24 domain-containing protein 10	TMED10 TMP21	P49755	Down
			Transmembrane protein C9orf144B (renamed as Protein FAM205A)	FAM205A C9orf144B	Q6ZU69	Down
			Tubulin--tyrosine ligase-like protein 12	TTLL12 KIAA0153	Q14166	Down
			V-type proton ATPase catalytic subunit A	ATP6V1A ATP6A1 ATP6V1A1 VPP2	P38606	Down
			Antileukoproteinase	SLPI WAP4 WFDC4	P03973	Up
			Beta-defensin 121	DEFB121 DEFB21	Q5J5C9	Up
			cDNA FLJ54705, highly similar to Serine/threonine-protein phosphatase 2A regulatory subunit B' (renamed as Serine/threonine-protein phosphatase 2A activator)	N/A	B4DZF8	Up
			Epididymal secretory protein E3-beta (Human epididymis-specific protein 3-beta)	EDDM3B FAM12B HE3B UNQ6412/PRO21187	P56851	Up
			Importin subunit beta-1 (Importin-90)	KPNB1 NTF97	Q14974	Up
			Isoform 1 of DAZ-associated protein 1	DAZAP1	Q96EP5-1	Up
			Isoform 1 of Nuclear pore membrane glycoprotein 210	NUP210 KIAA0906 PSEC0245	Q8TEM1-1	Up
			Isoform 1 of Nucleoporin NUP188 homolog	NUP188 KIAA0169	Q5SRE5-1	Up
			Isoform 1 of Peroxisomal membrane protein 11C	PEX11G PEX11C	Q96HA9-1	Up
			Isoform 4 of Dystrophin	DMD	P11532-4	Up
			Isoform 4 of Extracellular matrix protein 1	ECM1	Q16610-4	Up
			Isoform Mitochondrial of Cysteine desulfurase, mitochondrial (renamed as Cysteine desulfurase, mitochondrial)	NFS1 NIFS HUSSY-08	Q9Y697-1	Up
			Methylosome protein 50	WDR77 MEP50 WD45 HKMT1069 Nbla10071	Q9BQA1	Up
			Peroxisomal membrane protein 11B	PEX11B	O96011	Up
			PNAS-117 (renamed as Alternative protein MKKS)	MKKS hCG_40237	Q9HB66	Up
			Prostaglandin D2 synthase 21kDa (renamed as Glutathione-independent PGD synthase)	PTGDS	Q5SQ11	Up
			Ras-related protein Rab-10	RAB10	P61026	Up
			Solute carrier family 2, facilitated glucose transporter member 5	SLC2A5 GLUT5	P22732	Up
			T-complex protein 1 subunit zeta-2	CCT6B	Q92526	Up
			Testican-1	SPOCK1 SPOCK TIC1 TICN1	Q08629	Up
			TRIP12 protein (renamed as E3 ubiquitin-protein ligase TRIP12))	TRIP12 KIAA0045 ULF	Q14669	Up
			Uncharacterized protein FLJ43738	N/A	Q6ZUG5	Up
Binder et al. 2015 [80]	Mouse	Seminal plasma	Insulin	Ins1 Ins-1	P01325	Up
			Leptin (Obesity factor)	Lep Ob	P41160	Up
Fan et al. 2018 [54]	Human	Seminal plasma	Interleukin-6 (IL-6) (B-cell stimulatory factor 2) (BSF-2) (CTL differentiation factor) (CDF) (Hybridoma growth factor) (Interferon beta-2) (IFN-beta-2)	IL6 IFNB2	P05231	Up
			Tumor necrosis factor (Cachectin) (TNF-alpha) (Tumor necrosis factor ligand superfamily member 2) (TNF-a) [Cleaved into: Tumor necrosis factor, membrane form (N-terminal fragment) (NTF); Intracellular domain 1 (ICD1); Intracellular domain 2 (ICD2); C-domain 1; C-domain 2; Tumor necrosis factor, soluble form]	TNF TNFA TNFSF2	P01375	Up
Ferigolo et al. 2019 [33]	Human	Seminal plasma	Annexin A3	ANXA3 ANX3	P12429	Down
			Beta-microseminoprotein	MSMB PRSP	P08118	Down
			BPI fold-containing family B member 2	BPIFB2 BPIL1 C20orf184 LPLUNC2 UNQ2489/PRO5776	Q8N4F0	Down
			Brain-specific serine protease 4	PRSS22 BSSP4 PRSS26 SP001LA UNQ302/PRO343	Q9GZN4	Down
			Cathepsin B	CTSB CPSB	P07858	Down
			Cathepsin D	CTSD CPSD	P07339	Down
			CD81 antigen	CD81 TAPA1 TSPAN28	P60033	Down
			Cysteine-rich secretory protein LCCL domain-containing 1	CRISPLD1 CRISP10 LCRISP1 UNQ342/PRO541	Q9H336	Down
			Follistatin-related protein 1	FSTL1 FRP	Q12841	Down
			Heat shock protein HSP 90-alpha	HSP90AA1 HSP90A HSPC1 HSPCA	P07900	Down
			Macrophage migration inhibitory factor	MIF GLIF MMIF	P14174	Down
			Peptidyl-prolyl cis-trans isomerase C	PPIC CYPC	P45877	Down
			Phospholipase A2, membrane associated	PLA2G2A PLA2B PLA2L RASF-A	P14555	Down
			Prostatic acid phosphatase	ACP3 ACPP	P15309	Down
			Protein dopey-2	DOP1B C21orf5 DOPEY2 KIAA0933	Q9Y3R5	Down
			Protein OS-9	OS9	Q13438	Down
			SH3 domain-binding glutamic acid-rich-like protein	SH3BGRL	O75368	Down
			Toll-interacting protein	TOLLIP	Q9H0E2	Down
			Zymogen granule protein 16 homolog B	ZG16B UNQ773/PRO1567	Q96DA0	Down
			SEC14-like protein 3	SEC14L3	Q9UDX4	in obese men only
			ADP-ribosyl cyclase/cyclic ADP-ribose hydrolase 1	CD38	P28907	Up
			Alpha-1-antitrypsin	SERPINA1 AAT PI PRO0684 PRO2209	P01009	Up
			Alpha-1B-glycoprotein	A1BG	P04217	Up
			Apolipoprotein A-I	APOA1	P02647	Up
			Arrestin domain-containing protein 1	ARRDC1	Q8N5I2	Up
			Beta-defensin 129	DEFB129 C20orf87 DEFB29 UNQ5794/PRO19599	Q9H1M3	Up
			Beta-hexosaminidase subunit alpha	HEXA	P06865	Up
			Cathelicidin antimicrobial peptide	CAMP CAP18 FALL39 HSD26	P49913	Up
			CD44 antigen (renamed as Metalloproteinase inhibitor 2)	TIMP2	P16035	Up
			Ceruloplasmin	CP	P00450	Up
			Clusterin	CLU APOJ CLI KUB1 AAG4	P10909	Up
			Complement C3	C3 CPAMD1	P01024	Up
			Complement C4-B	C4B CO4 CPAMD3; C4B_2	P0C0L5	Up
			Complement factor B	CFB BF BFD	P00751	Up
			Contactin-associated protein-like 2	CNTNAP2 CASPR2 KIAA0868	Q9UHC6	Up
			Extracellular matrix protein 1	ECM1	Q16610	Up
			Glutathione peroxidase 3	GPX3 GPXP	P22352	Up
			Glutathione reductase, mitochondrial	GSR GLUR GRD1	P00390	Up
			Haptoglobin	HP	P00738	Up
			Heat shock protein beta-1	HSPB1 HSP27 HSP28	P04792	Up
			Histone H2A type 1-J	H2AC14 H2AFE HIST1H2AJ	Q99878	Up
			Ig alpha-1 chain C region	IGHA1	P01876	Up
			Ig alpha-2 chain C region	IGHA2	P01877	Up
			Ig gamma-1 chain C region	IGHG1	P01857	Up
			Ig heavy chain V-III region BRO	IGHV3-13	P01766	Up
			Ig kappa chain C region	IGKC	P01834	Up
			Ig kappa chain V-II region TEW	IGKV2D-28	P01615	Up
			Ig kappa chain V-III region GOL	IGKV3-20	P01619	Up
			Ig lambda chain V-IV region Hil	IGLV3-25	P01717	Up
			Ig lambda-3 chain C regions	IGLC3	P0DOY3	Up
			Immunoglobulin J chain	JCHAIN IGCJ IGJ	P01591	Up
			Immunoglobulin lambda-like polypeptide 5	IGLL5	B9A064	Up
			Lipolysis-stimulated lipoprotein receptor	LSR LISCH	Q86X29	Up
			Myeloperoxidase	MPO	P05164	Up
			N-acetylgalactosamine-6-sulfatase	GALNS	P34059	Up
			Neutrophil defensin 3	DEFA3 DEF3	P59666	Up
			Neutrophil gelatinase-associated lipocalin	LCN2 HNL NGAL	P80188	Up
			Olfactomedin-4	OLFM4 GW112 UNQ362/PRO698	Q6UX06	Up
			Plasma protease C1 inhibitor	SERPING1 C1IN C1NH	P05155	Up
			Polymeric immunoglobulin receptor	PIGR	P01833	Up
			Probable serine carboxypeptidase CPVL	CPVL VLP PSEC0124 UNQ197/PRO223	Q9H3G5	Up
			Prostate and testis expressed protein 4	PATE4	P0C8F1	Up
			Prostate stem cell antigen	PSCA UNQ206/PRO232	O43653	Up
			Protein S100-A8	S100A8 CAGA CFAG MRP8	P05109	Up
			Protein S100-A9	S100A9 CAGB CFAG MRP14	P06702	Up
			Ribonuclease pancreatic	RNASE1 RIB1 RNS1	P07998	Up
			Semaphorin-3C	SEMA3C SEMAE	Q99985	Up
			Semenogelin-1	SEMG1 SEMG	P04279	Up
			Twisted gastrulation protein homolog 1	TWSG1 TSG PSEC0250	Q9GZX9	Up
			WAP four-disulfide core domain protein 2	WFDC2 HE4 WAP5	Q14508	Up
Peng et al. 2019 [44]	Mouse	Spermatozoa	110 kDa cell membrane glycoprotein;Adhesion-regulating molecule 1;Proteasomal ubiquitin receptor ADRM1;Rpn13 homolog;Adrm1 protein	Adrm1 Gp110	Q9JKV1	Down
			1700029J11Rik protein;Novel protein (1700029J11Rik);RIKEN cDNA 1700029J11 gene;Putative uncharacterized protein	Fam209 1700029J11Rik	A2APA5	Down
			2810408A11Rik protein;Novel protein similar to protein phosphatase 1, regulatory (Inhibitor) subunit 2 Ppp1r2;Putative uncharacterized protein;RIKEN cDNA 2810408A11, isoform CRA_e	2810408A11Rik	A0JLP5	Down
			3-ketoacyl-CoA thiolase B, peroxisomal;Acetyl-CoA acyltransferase B;Beta-ketothiolase B;Peroxisomal 3-oxoacyl-CoA thiolase B;Putative uncharacterized protein;MCG21883, isoform CRA_e;3-ketoacyl-CoA thiolase A, peroxisomal;Acetyl-CoA acyltransferase A;Beta-ketothiolase A;Peroxisomal 3-oxoacyl-CoA thiolase A;Acaa1a protein;MCG21883, isoform CRA_b	Acaa1b Acaa1	Q8VCH0	Down
			33 kDa VAMP-associated protein;Vesicle-associated membrane protein-associated protein A	Vapa Vap33	Q9WV55	Down
			40S ribosomal protein S14;Ribosomal protein S14;Putative uncharacterized protein	Rps14	P62264	Down
			4933415F23Rik protein	Ppp1r14bl 4933415F23Rik	Q14BX6	Down
			55 kDa erythrocyte membrane protein;Membrane protein, palmitoylated 1;Membrane protein, palmitoylated;Putative uncharacterized protein	Mpp1	P70290	Down
			60S acidic ribosomal protein P1;MCG10168;Putative uncharacterized protein;Ribosomal protein, large, P1;Rplp1 protein	Rplp1	P47955	Down
			60S ribosomal protein L18;Ribosomal protein L18	Rpl18	P35980	Down
			60S ribosomal protein L23;Ribosomal protein L23;Ribosomal protein L23, isoform CRA_b	Rpl23	P62830	Down
			60S ribosomal protein L27	Rpl27	P61358	Down
			60S ribosomal protein L30;Rpl30 protein;MCG20799;MCG22431;MCG4898, isoform CRA_a;Putative uncharacterized protein;Ribosomal protein L30	Rpl30	P62889	Down
			60S ribosomal protein L38;MCG13615, isoform CRA_a;MCG14541;MCG7366;Putative uncharacterized protein;Ribosomal protein L38	Rpl38	Q9JJI8	Down
			Acrosome formation-associated factor;Equatorin;Putative uncharacterized protein;Sperm-specific single transmembrane domain protein long form;Sperm-specific single transmembrane domain protein short form	Eqtn Afaf Mn9	Q9D9V2	Down
			Actin-like protein 7A;Actin-like-7-alpha;Testis-specific actin-2;Actin-like 7a	Actl7a Tact2	Q9QY84	Down
			Actin-like protein 9	Actl9 Actl7c	Q8CG27	Down
			Activator of G-protein signaling 2;Dynein light chain Tctex-type 1;T-complex testis-specific protein 1;TCTEX-1;Tctex-1;Putative uncharacterized protein;Dynlt1 protein	Dynlt1 Tctel1 Tctex-1 Tctex1	P51807	Down
			Acyl-Coenzyme A binding domain containing 7;Acyl-CoA-binding domain-containing protein 7	Acbd7	Q9D258	Down
			Acylamino-acid-releasing enzyme;Acylaminoacyl-peptidase;Acyl-peptide hydrolase	Apeh	Q8R146	Down
			Aldo-keto reductase family 7, member A5 (Aflatoxin aldehyde reductase);Aflatoxin B1 aldehyde reductase member 2;Succinic semialdehyde reductase	Akr7a2 Afar Akr7a5	Q8CG76	Down
			Alpha-2-HS-glycoprotein;Countertrypin;Fetuin-A;Alpha 2-Heremans-Schmid-glycoprotein;Putative uncharacterized protein;Alpha-2-HS-glycoprotein, isoform CRA_a	Ahsg Fetua	P29699	Down
			Alpha-SGT;Small glutamine-rich tetratricopeptide repeat-containing protein alpha;Putative uncharacterized protein;Small glutamine-rich tetratricopeptide repeat (TPR)-containing, alpha, isoform CRA_b	Sgta Sgt	Q8BJU0	Down
			Apolipoprotein A-I;Putative uncharacterized protein;Apoa1 protein;Apolipoprotein A1	Apoa1	Q00623	Down
			Arginine decarboxylase;Antizyme inhibitor 2;Arginine decarboxylase-like protein (renamed as Antizyme inhibitor 2)	Azin2	Q8BVM4	Down
			BC051142 protein;Testis specific basic protein	BC051142 Tesb RP23-24A13.2-001	Q80XD0	Down
			Beta-actin-like protein 2;Kappa-actin	Actbl2	Q8BFZ3	Down
			BolA-like protein 3;BolA-like 3 (E. coli);Putative uncharacterized protein	Bola3	Q8CEI1	Down
			Bradykinin;Kininogen-1;Kininogen-1 heavy chain;Kininogen-1 light chain	Kng1 Kng	O08677	Down
			Caltractin;Centrin-1	Cetn1 Calt	P41209	Down
			Casein kinase II subunit alpha;Casein kinase II alpha subunit;Putative uncharacterized protein;Casein kinase 2, alpha 1 polypeptide;Casein kinase II, alpha 1 polypeptide, isoform CRA_a;Casein kinase II, alpha 1 polypeptide, isoform CRA_b	Csnk2a1 Ckiia	Q60737	Down
			cDNA sequence BC048562;Putative uncharacterized protein	BC048562	Q80ZQ7	Down
			Cellular retinol-binding protein;Cellular retinol-binding protein I;Retinol-binding protein 1;Putative uncharacterized protein;Rbp1 protein;Retinol binding protein 1, cellular	Rbp1 Crbpi Rbp-1	Q00915	Down
			Centromere protein V;Proline-rich protein 6	Cenpv Prr6	Q9CXS4	Down
			Centrosome and spindle pole associated protein 1;Centrosome/spindle pole-associated protein 2;Centrosome/spindle pole-associated protein 3;Cspp1 protein	Cspp1 Cspp	B2RX88	Down
			Choline transporter-like protein 5;Solute carrier family 44 member 5;Solute carrier family 44, member 5	Slc44a5 Ctl5	Q5RJI2	Down
			COP9 homolog;COP9 signalosome complex subunit 8;JAB1-containing signalosome subunit 8	Cops8 Csn8	Q8VBV7	Down
			Cylicin, basic protein of sperm head cytoskeleton 2;Putative uncharacterized protein	Cylc2	B1AWN8	Down
			Cysteine and glycine-rich protein 1;Cysteine-rich protein 1;Csrp1 protein;Cysteine and glycine-rich protein 1, isoform CRA_b;Putative uncharacterized protein	Csrp1 Crp1 Csrp	P97315	Down
			Dual specificity phosphatase 3 (Vaccinia virus phosphatase VH1-related);Dual specificity protein phosphatase 3;T-DSP11;Dual specificity phosphatase 3 (Vaccinia virus phosphatase VH1-related), isoform CRA_b;Putative uncharacterized protein	Dusp3	B1AQF4	Down
			Erythrocyte band 7 integral membrane protein;Protein 7.2b;Stomatin;Stomatin, isoform CRA_b;Putative uncharacterized protein;Stom protein	Stom Epb7.2 Epb72	P54116	Down
			Erythrocyte protein band 4.1;4.1R;Band 4.1;Protein 4.1;Protein 4.1R;Putative uncharacterized protein	Epb41 Epb4.1	A2A841	Down
			Ewing sarcoma breakpoint region 1;RNA-binding protein EWS;Putative uncharacterized protein;MCG14699, isoform CRA_c	Ewsr1	Q5SUS9	Down
			Family with sequence similarity 71, member D (Golgi-associated Rab2B interactor-like 2)	Fam71d GARI-L2	Q80W24	Down
			GDI-3;Guanosine diphosphate dissociation inhibitor 2;Rab GDP dissociation inhibitor beta;Putative uncharacterized protein	Gdi2 Gdi3	Q61598	Down
			Glycerophosphodiester phosphodiesterase 6;Glycerophosphodiester phosphodiesterase domain-containing protein 4;Glycerophosphodiester phosphodiesterase domain containing 4	Gdpd4 Gde6	Q3TT99	Down
			Golgi-associated Rab2B interactor-like 4;MCG1029078	Fam71a GARI-L4	B7XG49	Down
			Granule cell differentiation protein;Myotrophin;Protein V-1	Mtpn Gcdp	P62774	Down
			Histidine-rich glycoprotein HRG;Histidine-rich glycoprotein Hrg;Histidine-rich glycoprotein	Hrg	Q9ESB3	Down
			Histone H2A	H2al1a; H2al1c; H2al1d; H2al1f; H2al1g; H2al1h; H2al1i	Q5M8Q2	Down
			Histone H4	H4c1 Hist1h4a; H4c2 H4-53 Hist1h4b; H4c3 H4-12 Hist1h4c; H4c4 Hist1h4d; H4c6 Hist1h4f; H4c8 Hist1h4h; H4c9 Hist1h4i; H4c11 Hist1h4j; H4c12 Hist1h4k; Hist1h4m; H4c14 Hist2h4 Hist2h4a; H4f16 Hist4h4	P62806	Down
			HLA-B-associated transcript 3;Large proline-rich protein BAT3;Putative uncharacterized protein;Bat3 protein	Bag6 Bat3	Q9Z1R2	Down
			IQ and ubiquitin-like domain-containing protein	Iqub	Q8CDK3	Down
			Leucine zipper transcription factor-like protein 1	Lztfl1	Q9JHQ5	Down
			Lymphocyte antigen 6 complex locus protein G5b	Ly6g5b	Q8K1T4	Down
			Lymphocyte antigen 6 complex locus protein G5c	Ly6g5c	Q8K1T5	Down
			Macropain epsilon chain;Multicatalytic endopeptidase complex epsilon chain;Proteasome chain 6;Proteasome epsilon chain;Proteasome subunit beta type-5;Proteasome subunit X;Putative uncharacterized protein	Psmb5	O55234	Down
			Macropain zeta chain;Multicatalytic endopeptidase complex zeta chain;Proteasome subunit alpha type-5;Proteasome zeta chain;Proteasome subunit alpha type	Psma5	Q9Z2U1	Down
			Malic enzyme 2;NAD-dependent malic enzyme, mitochondrial;Malic enzyme	Me2	Q99KE1	Down
			MCG145317;Williams-Beuren syndrome critical region protein 25;Putative uncharacterized protein	Wbscr25	Q810H9	Down
			MCG48927;Putative uncharacterized protein;RIKEN cDNA 1700071K01 gene (renamed as Prohibitin)	1700071K01Rik	Q3V2K0	Down
			Mitochondrial import receptor subunit TOM6 homolog;Overexpressed breast tumor protein homolog;Translocase of outer membrane 6 kDa subunit homolog	Tomm6 Obtp Tom6	Q9CQN3	Down
			Mitsugumin-33B;Transmembrane protein 38B;Trimeric intracellular cation channel type B	Tmem38b D4Ertd89e Mg33b	Q9DAV9	Down
			Myosin regulatory light chain 2, smooth muscle isoform;Myosin regulatory light chain 9;Myosin regulatory light polypeptide 9;MCG5232;Myosin light polypeptide 9, regulatory	Myl9 Myrl2	Q9CQ19	Down
			N/A (similar to KIAA1683 protein)	N/A	N/A	Down
			N/A (similar to testis derived transcript)	N/A	N/A	Down
			PAI1 RNA-binding protein 1;Plasminogen activator inhibitor 1 RNA-binding protein;SERPINE1 mRNA-binding protein 1;Putative uncharacterized protein	Serbp1 Pairbp1	Q9CY58	Down
			Peptidyl-tRNA hydrolase 2, mitochondrial;Peptidyl-tRNA hydrolase 2;Peptidyl-tRNA hydrolase 2, isoform CRA_b	Ptrh2 Pth2	Q8R2Y8	Down
			Pierce 1;UPF0691 protein C9orf116 homolog;Novel protein (1700007K13Rik)		Q5BN45	Down
			Plasma membrane Ca++ transporting ATPase 4 splice variant b;Plasma membrane Ca++ transporting ATPase 4 variant x/b	Atp2b4	Q6Q477	Down
			PP2A subunit A isoform PR65-alpha;PP2A subunit A isoform R1-alpha;Serine/threonine-protein phosphatase 2A 65 kDa regulatory subunit A alpha isoform;Protein phosphatase 2 (Formerly 2A), regulatory subunit A (PR 65), alpha isoform;Putative uncharacterized protein	Ppp2r1a	Q76MZ3	Down
			Protein FAM24A	Fam24a	Q8CF27	Down
			Putative uncharacterized protein	4932415D10Rik	Q8CDI3	Down
			Putative uncharacterized protein	Gm7073 631784	Q3UXG0	Down
			Putative uncharacterized protein	Tsc22d4	Q3TCX6	Down
			Putative uncharacterized protein (renamed as Cylicin_N domain-containing protein (Fragment))	Cylc1	Q9CUM9	Down
			Putative uncharacterized protein (renamed as FAM75 domain-containing protein)	Spata31d1d	Q8C5W2	Down
			Putative uncharacterized protein (renamed as FAM75 domain-containing protein)	Spata31d1a	Q8CDS1	Down
			Putative uncharacterized protein (renamed as Testis-expressed 48)	Tex48 1700018C11Rik	Q9DA81	Down
			Putative uncharacterized protein NG8	NG8	O70357	Down
			Putative uncharacterized protein;PP2A subunit A isoform PR65-beta;PP2A subunit A isoform R1-beta;Serine/threonine-protein phosphatase 2A 65 kDa regulatory subunit A beta isoform	Ppp2r1b	Q3TTF6	Down
			Putative uncharacterized protein;RIKEN cDNA 2200002J24, isoform CRA_a	2200002J24Rik	Q9D807	Down
			Ran guanine nucleotide release factor;Ran-binding protein MOG1	Rangrf Mog1 Rangnrf	Q9JIB0	Down
			Ras-related protein Rab-8B;Rab8B;RAB8B, member RAS oncogene family;RAB8B, member RAS oncogene family, isoform CRA_c	Rab8b	P61028	Down
			Ras-related protein Ral-A;V-ral simian leukemia viral oncogene homolog A (Ras related);V-ral simian leukemia viral oncogene homolog A (Ras related), isoform CRA_b;Putative uncharacterized protein	Rala Ral Ral-a	P63321	Down
			RIKEN cDNA 4921517D21 gene;Putative uncharacterized protein;Novel protein (4921517D21Rik);RIKEN cDNA 4921517D21	Actl11 4921517D21Rik	Q14BL3	Down
			Secretory carrier-associated membrane protein 1;Putative uncharacterized protein;Secretory carrier membrane protein 1	Scamp1	Q8K021	Down
			Secretory carrier-associated membrane protein 2;Putative uncharacterized protein;Secretory carrier membrane protein 2	Scamp2	Q9ERN0	Down
			Serine/threonine-protein phosphatase 4 regulatory subunit 1;Putative uncharacterized protein	Ppp4r1	Q8K2V1	Down
			Serum albumin;Albumin 1;Putative uncharacterized protein	Alb Alb-1 Alb1	P07724	Down
			TCTEX5 long isoform;TCTEX5 isoform 2;Protein phosphatase 1 regulatory subunit 11;T-complex testis expressed protein 5;TCTEX5 isoform 3;TCTEX5 isoform 1 (renamed as E3 ubiquitin-protein ligase PPP1R11)	Ppp1r11	A5A4Y9	Down
			Testis specific basic protein	BC051142 Tesb RP23-24A13.2-003	A2CG24	Down
			TLC domain-containing protein 4 (Transmembrane protein 56)	Tlcd4 Tmem56	Q8CGF5	Down
			Translin-associated factor X-interacting protein 1;Tsnaxip1 protein	Tsnaxip1 Txi1	Q99P25	Down
			Transmembrane protein ENSP00000340100 homolog (renamed as Protein FAM205C, isoforme 1)	Fam205c	Q80YD3-1	Down
			Transmembrane protein ENSP00000340100 homolog;Putative uncharacterized protein (renamed as Protein FAM205C, isoforme 2)	BC049635 (Fam205c)	Q80YD3-2	Down
			Uncharacterized protein C1orf185 homolog;Novel protein;Putative uncharacterized protein	N/A	Q9CPZ3	Down
			Uncharacterized protein C2orf53 homolog (renamed as Proline-rich protein 30)	Prr30	Q9D9B7	Down
			Uncharacterized protein C9orf128 homolog (renamed as Protein FAM221B)	Fam221b	Q8C627-1	Down
			UPF0740 protein C1orf192 homolog (renamed as Protein Flattop (Cilia- and flagella-associated protein 126))	Cfap126 Fltp	Q6P8X9	Down
			1-acylglycerol-3-phosphate O-acyltransferase 2;1-acyl-sn-glycerol-3-phosphate acyltransferase beta;Lysophosphatidic acid acyltransferase beta;1-acylglycerol-3-phosphate O-acyltransferase 2 (Lysophosphatidic acid acyltransferase, beta);1-acylglycerol-3-phosphate O-acyltransferase 2 (Lysophosphatidic acid acyltransferase, beta), isoform CRA_a;Putative uncharacterized protein	Agpat2	Q8K3K7	Up
			26S protease regulatory subunit 10B;26S proteasome AAA-ATPase subunit RPT4;Proteasome 26S subunit ATPase 6;Proteasome subunit p42;Proteasome (Prosome, macropain) 26S subunit, ATPase, 6;Proteasome (Prosome, macropain) 26S subunit, ATPase, 6, isoform CRA_b;Psmc6 protein	Psmc6 Sug2	P62334	Up
			60S ribosomal protein L15;Ribosomal protein L15	Rpl15	Q9CZM2	Up
			8 kDa dynein light chain;Dynein light chain 1, cytoplasmic;Dynein light chain LC8-type 1;Protein inhibitor of neuronal nitric oxide synthase;Putative uncharacterized protein	Dynll1 Dlc1 Dncl1 Dnclc1	P63168	Up
			A6L;ATP synthase protein 8;F-ATPase subunit 8	Mtatp8 Atp8 mt-Atp8	P03930	Up
			Acyl-CoA dehydrogenase family member 10;Putative uncharacterized protein	Acad10	Q8K370	Up
			Adenine nucleotide translocator 4;ADP,ATP carrier protein 4;ADP/ATP translocase 4;Solute carrier family 25 member 31;Sperm flagellar energy carrier protein;Solute carrier family 25 (Mitochondrial carrier; adenine nucleotide translocator), member 31	Slc25a31 Aac4 Ant4 Sfec	Q3V132	Up
			Apolipoprotein A-I-binding protein	Naxe Aibp Apoa1bp	Q8K4Z3	Up
			ATP synthase subunit f, mitochondrial	Atp5mf Atp5j2	P56135	Up
			ATP synthase subunit gamma, mitochondrial;F-ATPase gamma subunit;ATP synthase gamma chain;ATP synthase gamma-subunit;ATP synthase, H+ transporting, mitochondrial F1 complex, gamma polypeptide 1	Atp5f1c Atp5c1	Q91VR2	Up
			ATP synthase subunit s, mitochondrial;ATP synthase-coupling factor B;Mitochondrial ATP synthase regulatory component factor B	Dmac2l Atp5s Atpw	Q9CRA7	Up
			B-cell receptor-associated protein 32;Prohibitin;Putative uncharacterized protein	Phb	P67778	Up
			BCS1-like protein;Mitochondrial chaperone BCS1	Bcs1l	Q9CZP5	Up
			Beta-defensin 2;Defensin, beta 2;Defensin beta 2;MCG6977	Defb2	P82020	Up
			Calcium-binding protein 86;Calcium-binding tyrosine phosphorylation-regulated protein;Testis-specific calcium-binding protein CBP86;Calcium-binding tyrosine-(Y)-phosphorylation regulated (Fibrousheathin 2);Calcium-binding tyrosine-(Y)-phosphorylation regulated (Fibrousheathin 2), isoform CRA_b	Cabyr Cbp86	Q9D424	Up
			Caltractin isoform 1;Centrin-2;Centrin 2	Cetn2 Calt	Q9R1K9	Up
			Cation channel sperm-associated protein subunit beta	Catsperb	A2RTF1	Up
			Cation channel sperm-associated protein subunit gamma;Putative uncharacterized protein	Catsperg2 Catsperg	C6KI89	Up
			Cell cycle control protein 50A;Transmembrane protein 30A	Tmem30a Cdc50a D9Wsu20e	Q8VEK0	Up
			CII-4;QPs3;Succinate dehydrogenase [ubiquinone] cytochrome b small subunit, mitochondrial;Succinate dehydrogenase complex subunit D;Succinate-ubiquinone oxidoreductase cytochrome b small subunit;Succinate-ubiquinone reductase membrane anchor subunit;Putative uncharacterized protein	Sdhd	Q9CXV1	Up
			Coiled-coil domain-containing protein 42A;Coiled-coil domain containing 42	Ccdc42	Q5SV66	Up
			Complex I-15 kDa;NADH dehydrogenase [ubiquinone] iron-sulfur protein 5;NADH-ubiquinone oxidoreductase 15 kDa subunit;NADH dehydrogenase (Ubiquinone) Fe-S protein 5	Ndufs5	Q99LY9	Up
			Complex I-42kD;NADH dehydrogenase [ubiquinone] 1 alpha subcomplex subunit 10, mitochondrial;NADH-ubiquinone oxidoreductase 42 kDa subunit	Ndufa10	Q99LC3	Up
			Complex I-B12;NADH dehydrogenase [ubiquinone] 1 beta subcomplex subunit 3;NADH-ubiquinone oxidoreductase B12 subunit;Putative uncharacterized protein	Ndufb3	Q9CQZ6	Up
			Complex I-B14.7;NADH dehydrogenase [ubiquinone] 1 alpha subcomplex subunit 11;NADH-ubiquinone oxidoreductase subunit B14.7	Ndufa11	Q9D8B4	Up
			Complex I-B9;NADH dehydrogenase [ubiquinone] 1 alpha subcomplex subunit 3;NADH-ubiquinone oxidoreductase B9 subunit	Ndufa3	Q9CQ91	Up
			Complex I-SGDH;NADH dehydrogenase [ubiquinone] 1 beta subcomplex subunit 5, mitochondrial;NADH-ubiquinone oxidoreductase SGDH subunit;Putative uncharacterized protein	Ndufb5	Q9CQH3	Up
			Cytochrome c oxidase polypeptide III;Cytochrome c oxidase subunit 3;Ceramide kinase;Putative uncharacterized protein;MKIAA1646 protein;Acylsphingosine kinase	mt-Co3 COIII Mtco3	P00416	Up
			Cytochrome c oxidase polypeptide VIc;Cytochrome c oxidase subunit 6C	Cox6c	Q9CPQ1	Up
			Cytochrome c oxidase polypeptide VIIc;Cytochrome c oxidase subunit 7C, mitochondrial;Cytochrome c oxidase, subunit VIIc;MCG10796;MCG1735, isoform CRA_a	Cox7c Cox7c1	P17665	Up
			dTMP kinase;Thymidylate kinase	Dtymk Tmk	P97930	Up
			EF-hand calcium-binding domain-containing protein 1	Efcab1	Q9D3N2	Up
			Enoyl-CoA hydratase 1;Enoyl-CoA hydratase, mitochondrial;Short-chain enoyl-CoA hydratase	Echs1	Q8BH95	Up
			Fumarylacetoacetate hydrolase domain-containing protein 1;Putative uncharacterized protein	Fahd1 MNCb-4134	Q8R0F8	Up
			Hydroxysteroid (17-beta) dehydrogenase 10;Putative uncharacterized protein;17beta-hydroxysteroid dehydrogenase type 10/short chain L-3-hydroxyacyl-CoA dehydrogenase;17-beta-hydroxysteroid dehydrogenase 10;3-hydroxy-2-methylbutyryl-CoA dehydrogenase;3-hydroxyacyl-CoA dehydrogenase type II;3-hydroxyacyl-CoA dehydrogenase type-2;Endoplasmic reticulum-associated amyloid beta-peptide-binding protein;M…	Hsd17b10	A2AFQ2	Up
			Inositol 1,4,5-trisphosphate receptor type 2;Inositol 1,4,5-trisphosphate type V receptor;IP3 receptor isoform 2;Type 2 inositol 1,4,5-trisphosphate receptor;Inositol 1,4,5-triphosphate receptor 2;Putative uncharacterized protein;Inositol trisphosphate receptor type 2;Itpr2 protein	Itpr2 Itpr5	Q9Z329	Up
			Isochorismatase domain-containing protein 2A, mitochondrial;Isoc2a protein	Isoc2a Isoc2	P85094	Up
			Long-chain acyl-CoA synthetase 1;Long-chain-fatty-acid--CoA ligase 1;Acyl-CoA synthetase long-chain family member 1;Putative uncharacterized protein	Acsl1 Acsl2 Facl2	P41216	Up
			Macropain subunit C9;Multicatalytic endopeptidase complex subunit C9;Proteasome component C9;Proteasome subunit alpha type-4;Proteasome subunit L;Proteasome subunit alpha type	Psma4	Q9R1P0	Up
			Mitochondrial 18 kDa protein;Putative uncharacterized protein;Novel protein;RIKEN cDNA 1700020C11;1700020C11Rik	Mtfp1 Mtp18	Q9CRB8	Up
			Mitochondrial carrier homolog 2;MCG13498, isoform CRA_d;Mitochondrial carrier homolog 2 (C. elegans);Mtch2 protein;Putative uncharacterized protein	Mtch2	Q791V5	Up
			Muscarinic acetylcholine receptor M2;Chrm2 protein	Chrm2 Chrm-2	Q9ERZ4	Up
			N/A (similar to EF hand domain family, member B)	N/A	N/A	Up
			NADH dehydrogenase subunit 4;NADH-ubiquinone oxidoreductase chain 4;Putative uncharacterized protein	Mtnd4 mt-Nd4 Nd4	P03911	Up
			Oxidoreductase HTATIP2;Putative uncharacterized protein;HIV-1 tat interactive protein 2, homolog (Human);HIV-1 tat interactive protein 2, homolog (Human), isoform CRA_a;Htatip2 protein	Htatip2 Cc3 Tip30	Q9Z2G9	Up
			p47 protein;RuvB-like 2;Putative uncharacterized protein;RuvB-like protein 2	Ruvbl2	Q9WTM5	Up
			Postacrosomal sheath WW domain-binding protein;WW domain-binding protein 2-like	Wbp2nl Pawp	Q9D529	Up
			Predicted;Testase-6	Adam34l Adam36 EG384813 Gm5346	Q7M766	Up
			Probable saccharopine dehydrogenase;Putative uncharacterized protein	Sccpdh	Q8R127	Up
			Protein TANC2;Tetratricopeptide repeat, ankyrin repeat and coiled-coil domain-containing protein 2;Tetratricopeptide repeat, ankyrin repeat and coiled-coil containing 2	Tanc2 Kiaa1148	A2A690	Up
			Putative malate dehydrogenase 1B	Mdh1b	Q5F204	Up
			Putative uncharacterized protein	Pebp4 1700081D17Rik	Q9D9L9	Up
			Putative uncharacterized protein	Epp13 EG627821 Gm6792	Q8C5A6	Up
			Putative uncharacterized protein (renamed as FAM75 domain-containing protein)	Htra1 Htra Prss11	Q9R118	Up
			Putative uncharacterized protein;WAP four-disulfide core domain 6A	Wfdc6a Gm122	Q3UW55	Up
			Pyruvate kinase isozymes M1/M2;Pyruvate kinase muscle isozyme	Pkm Pk3 Pkm2 Pykm	P52480	Up
			Signal-induced proliferation-associated 1-like protein 1;Putative uncharacterized protein;Sipa1l1 protein	Sipa1l1 Kiaa0440	Q8C0T5	Up
			Sodium/potassium-dependent ATPase subunit beta-3;Sodium/potassium-transporting ATPase subunit beta-3;Atp1b3 protein;Putative uncharacterized protein;ATPase, Na+/K+ transporting, beta 3 polypeptide;MCG21656, isoform CRA_b;Na,K-ATPase beta-3 subunit;Na K-ATPase beta-3 subunit	Atp1b3	P97370	Up
			Tubulin beta-3 chain;Putative uncharacterized protein	Tubb3	Q9ERD7	Up
			WAP four-disulfide core domain 6B;WAP6b	Wfdc6b Wfdc6	F6ULY1	Up
Pini et al. 2020 [49]	Human	Progressive spermatozoa	Acyl-coenzyme A thioesterase THEM4	BANF2 BAFL C20orf179	Q9H503	Down
			ADP-ribosylation factor-like protein 2	MPC1 BRP44L CGI-129 HSPC040 PNAS-115	Q9Y5U8	Down
			AFG1-like ATPase	USP14 TGT	P54578	Down
			Alcohol dehydrogenase class-3	RAB18	Q9NP72	Down
			Alpha-soluble NSF attachment protein	EIF3F EIF3S5	O00303	Down
			Aminopeptidase B	SUGT1	Q9Y2Z0	Down
			Ankyrin repeat domain-containing protein 45	FAHD2A CGI-105	Q96GK7	Down
			Barrier-to-autointegration factor-like protein	CCDC189 C16orf93	A1A4V9	Down
			Bifunctional purine biosynthesis protein PURH	ADH5 ADHX FDH	P11766	Down
			Casein kinase I isoform gamma-1	CSNK1G1	Q9HCP0	Down
			Cilia- and flagella-associated protein 221	NAPA SNAPA	P54920	Down
			Ciliogenesis-associated TTC17-interacting protein	ELAPOR1 EIG121 KIAA1324 UNQ2426/PRO4985	Q6UXG2	Down
			Coiled-coil domain-containing protein 189	UBE4A KIAA0126	Q14139	Down
			CTD nuclear envelope phosphatase 1	NT5C DNT1 UMPH2	Q8TCD5	Down
			Cysteine protease ATG4B	SKP1 EMC19 OCP2 SKP1A TCEB1L	P63208	Down
			Cytoplasmic aconitate hydratase	LRRC74A C14orf166B LRRC74	Q0VAA2	Down
			DCN1-like protein 1	TTC12	Q9H892	Down
			Diphosphomevalonate decarboxylase	ATIC PURH OK/SW-cl.86	P31939	Down
			Elongation factor 1-beta	C1orf100	Q5SVJ3	Down
			Eukaryotic initiation factor 4A-II	GLOD4 C17orf25 CGI-150 My027	Q9HC38	Down
			Eukaryotic translation initiation factor 3 subunit F	RNPEP APB	Q9H4A4	Down
			Eukaryotic translation initiation factor 3 subunit K	GSS	P48637	Down
			Exportin-T	EIF4A2 DDX2B EIF4F	Q14240	Down
			Fumarylacetoacetate hydrolase domain-containing protein 2A	LTA4H LTA4	P09960	Down
			[Pyruvate dehydrogenase (acetyl-transferring)] kinase isozyme 1, mitochondrial	JAGN1	Q8N5M9	Up
			5'(3')-deoxyribonucleotidase, cytosolic type	NDUFS2	O75306	Up
			Actin-related protein 2	NUP35 MP44 NUP53	Q8NFH5	Up
Carvalho et al. 2021 [34]	Rat	Pellet after centrifugation (no purification)	Phosphoglycerate kinase	RGD1560402	M0R6Y8	Down
			Ras-related protein rab-2 A	Rab2a	F1LP82	Down
			outer dense fiber of sperm tails 2, isoform CRA_e	Odf2 rCG_45844	G3V7X0	Down
			Protein/nucleic acid deglycase DJ-1 (renamed as Parkinson disease protein 7 homolog)	Park7 Cap1	O88767	Down
			Tubulin beta-4B chain	Tubb4b	Q6P9T8	Down
			Keratin, type II cytoskeletal 5	Krt5 LOC102551453	A0A0G2K509	Down
			Cytochrome c, testis-specific	Cyct	P10715	Down
			Outer dense fiber protein 2	Odf2	A0A0H2UHM4	Up
			ATP synthase subunit beta	Atp5f1b Atp5b rCG_42467	G3V6D3	Up
			Tubulin beta chain	Tubb4b	G3V7C6	Up
			Glyceraldehyde-3-phosphate dehydrogenase	Gapdhs rCG_54229	B1WBQ8	Up
			CD177 antigen-like	LOC100909620 LOC100909662 LOC102553892 RGD1564380	M0R4W1	Up
			DLAT protein (renamed as Dihydrolipoyllysine-residue acetyltransferase component of pyruvate dehydrogenase complex, mitochondrial)	Dlat	P08461	Up
			Globin c2	Hba-a2 Glnc2 Hba2 rCG_34342	A0A0G2JSV6	Up
			Lysozyme c (renamed as Sperm acrosome membrane-associated protein 3)	Spaca3 Lyzc Spaca3_predicted rCG_32436	F1M6E7	Up
Diabetes
References	Species	Working sample	Protein namea	Gene name	Uniprot KB accession numberb	Protein variationc
Kriegel et al. 2009 [36]	Human	Progressive spermatozoa	Importin subunit beta-3; Karyopherin beta-3; ran-binding protein 5 (renamed as Importin-5)	IPO5 KPNB3 RANBP5	O00410	Down
			semenogelin 1 preproprotein	SEMG1 SEMG	P04279	Down
			Prolactin-induced protein	PIP GCDFP15 GPIP4	P12273	Down, Up
			A-kinase anchoring protein 4	AKAP4 AKAP82	Q5JQC9	Up
			Annexin A1	ANXA1 ANX1 LPC1	P04083	Up
			ferritin, Mitochondrial	FTMT	Q8N4E7	Up
			Hydroxysteroid (17-beta) deshydrogenase 10 isoform 1	HSD17B10 ERAB HADH2 MRPP2 SCHAD SDR5C1 XH98G2	Q99714	Up
Paasch et al. 2011 [40]	Human	Protein in type-1 diabetic patients. Progressive spermatozoa	beta-Galactosidase-1-like protein	GLB1L UNQ229/PRO262	Q6UWU2	Down
			gamma-Glutamyl hydrolase	GGH	Q92820	Down
			Clusterin	CLU APOJ CLI KUB1 AAG4	P10909	Up
			Lactotransferrin	LTF GIG12 LF	P02788	Up
			Outer dense fiber protein 1	ODF1 HSPB10 ODFP	Q14990	Up
			Semenogelin-1	SEMG1 SEMG	P04279	Up
			Sperm protein associated with the nucleus on the X chromosome B/F	SPANXC	Q9NY87	Up
			Zinc finger protein 813	ZNF813	Q6ZN06	Up
		Protein in type-2 diabetic patients. Progressive spermatozoa	Cytoplasmic aconitate hydratase	ACO1 IREB1	P21399	Down
			Aconitate hydratase, mitochondrial	ACO2	Q99798	Down
			Acrosin	ACR ACRS	P10323	Down
			Acrosin-binding protein	ACRBP	Q8NEB7	Down
			Acrosomal protein SP-10	ACRV1	P26436	Down
			Long-chain-fatty-acid--CoA ligase 1	ACSL1 FACL1 FACL2 LACS LACS1 LACS2	P33121	Down
			A-kinase anchor protein 4	AKAP4 AKAP82	Q5JQC9	Down
			Fructose-bisphosphate aldolase A	ALDOA ALDA	P04075	Down
			Actin-related protein M1	ACTRT3 ARPM1	Q9BYD9	Down
			BAG family molecular chaperone regulator 5	BAG5 KIAA0873	Q9UL15	Down
			Uncharacterized protein C1orf56	MENT C1orf56 UNQ547/PRO1104	Q9BUN1	Down
			Calicin	CCIN	Q13939	Down
			NADH-cytochrome b5 reductase 2	CYB5R2	Q6BCY4	Down
			EF-hand domain-containing protein 1	EFHC1	Q5JVL4	Down
			gamma-glutamyl hydrolase	GGH	Q92820	Down
			beta-galactosidase-1-like protein	GLB1L UNQ229/PRO262	Q6UWU2	Down
			Izumo sperm-egg fusion protein 4	IZUMO4 C19orf36 UNQ831/PRO1758	Q1ZYL8	Down
			Outer dense fiber protein 2	ODF2	Q5BJF6	Down
			Succinyl-CoA:3-ketoacid-coenzyme A transferase 1, mitochondrial	OXCT1 OXCT SCOT	P55809	Down
			Pyruvate dehydrogenase E1 component subunit a, testis-specific form, mitochondrial	PDHA2 PDHAL	P29803	Down
			Lysosomal Pro-X carboxypeptidase	PRCP PCP	P42785	Down
			Sperm acrosome-associated protein 5	SPACA5 LYZL5 SPACA5A UNQ6288/PRO20753; SPACA5B	Q96QH8	Down
			Tubulin alpha-3C/D chain	TUBA3C TUBA2	P0DPH7	Down
			Tubulin beta-2C chain	TUBB4B TUBB2C	P68371	Down
			Elongation factor Tu, mitochondrial	TUFM	P49411	Down
			Heat shock-related 70 kDa protein 2	HSPA2	P54652	Down, up
			Semenogelin-1	SEMG1 SEMG	P04279	Down, up
			Serum amyloid P-component	APCS PTX2	P02743	Up
			Clusterin	CLU APOJ CLI KUB1 AAG4	P10909	Up
			Copper homeostasis protein cutC homolog	CUTC CGI-32	Q9NTM9	Up
			Epididymal secretory protein E3-beta	EDDM3B FAM12B HE3B UNQ6412/PRO21187	P56851	Up
			Glutathione S-transferase Mu 3	GSTM3 GST5	P21266	Up
			L-amino-acid oxidase	IL4I1 FIG1 UNQ636/PRO1265	Q96RQ9	Up
			Lactotransferrin	LTF GIG12 LF	P02788	Up
			Lactadherin	MFGE8	Q08431	Up
			Nucleoside diphosphate kinase B	NME2 NM23B	P22392	Up
			Outer dense fiber protein 1	ODF1 HSPB10 ODFP	Q14990	Up
			Phosphoglycerate kinase 2	PGK2 PGKB	P07205	Up
			Prolactin-inducible protein	PIP GCDFP15 GPIP4	P12273	Up
An et al. 2018 [47]	Human	Pellet after centrifugation (no purification)	Prostaglandin-H2 D-isomerase	PTGDS PDS	P41222	Down
			Serum albumin	ALB GIG20 GIG42 PRO0903 PRO1708 PRO2044 PRO2619 PRO2675 UNQ696/PRO1341	P02768	Down
			Epididymal secretory protein E1	NPC2 HE1	P61916	Down
			Alpha-1-antitrypsin	SERPINA1 AAT PI PRO0684 PRO2209	P01009	Down
			Plasma serine protease inhibitor	SERPINA5 PCI PLANH3 PROCI	P05154	Down
			Alpha-1B-glycoprotein	A1BG	P04217	Down
			Lysosome-associated membrane glycoprotein 2	LAMP2	P13473	Down
			Aminopeptidase N	ANPEP APN CD13 PEPN	P15144	Down
			Serotransferrin	TF PRO1400	P02787	Down
			Extracellular matrix protein 1	ECM1	Q16610	Down
			Prosaposin	PSAP GLBA SAP1	P07602	Down
			Zinc-alpha-2-glycoprotein	AZGP1 ZAG ZNGP1	P25311	Down
			Ribonuclease T2	RNASET2 RNASE6PL	O00584	Down
			Extracellular superoxide dismutase [Cu-Zn]	SOD3	P08294	Down
			Biotinidase	BTD	P43251	Down
			Growth/differentiation factor 15	GDF15 MIC1 PDF PLAB PTGFB	Q99988	Down
			Galectin-3-binding protein	LGALS3BP M2BP	Q08380	Down
			Leucine-rich alpha-2-glycoprotein	LRG1 LRG	P02750	Down
			Kallistatin	SERPINA4 KST PI4	P29622	Down
			Alpha-2-antiplasmin	SERPINF2 AAP PLI	P08697	Down
			Cathepsin D	CTSD CPSD	P07339	Down
			Kallikrein-11	KLK11 PRSS20 TLSP UNQ649/PRO1279	Q9UBX7	Down
			Cystatin-C	CST3	P01034	Down
			Insulin-like growth factor-binding protein 2	IGFBP2 BP2 IBP2	P18065	Down
			Plasma alpha-L-fucosidase	FUCA2 PSEC0151 UNQ227/PRO260	Q9BTY2	Down
			Protein dopey-2	DOP1B C21orf5 DOPEY2 KIAA0933	Q9Y3R5	Down
			Cathepsin Z	CTSZ	Q9UBR2	Down
			Peptidyl-prolyl cis-trans isomerase B	PPIB CYPB	P23284	Down
			Metalloproteinase inhibitor 2	TIMP2	P16035	Down
			Contactin-associated protein-like 2	CNTNAP2 CASPR2 KIAA0868	Q9UHC6	Down
			Gamma-glutamyltranspeptidase 1	GGT1 GGT	P19440	Down
			Cysteine-rich secretory protein LCCL domain-containing 1	CRISPLD1 CRISP10 LCRISP1 UNQ342/PRO541	Q9H336	Down
			Protein FAM3B	FAM3B C21orf11 C21orf76 PRED44 UNQ320/PRO365	P58499	Down
			Nucleobindin-2	NUCB2 NEFA	P80303	Down
			Monocyte differentiation antigen CD14	CD14	P08571	Down
			Alpha-2-macroglobulin	A2M CPAMD5 FWP007	P01023	Down
			Dipeptidyl peptidase 4	DPP4 ADCP2 CD26	P27487	Down
			Heat shock 70 kDa protein 13	HSPA13 STCH	P48723	Down
			Serpin B3	SERPINB3 SCCA SCCA1	P29508	Up
			Olfactomedin-4	OLFM4 GW112 UNQ362/PRO698	Q6UX06	Up
			Keratin, type II cytoskeletal 1	KRT1 KRTA	P04264	Up
			Keratin, type II cytoskeletal 6A	KRT6A K6A KRT6D	P02538	Up
			Keratin, type I cytoskeletal 16	KRT16 KRT16A	P08779	Up
			Keratin, type I cytoskeletal 10	KRT10 KPP	P13645	Up
			Keratin, type I cytoskeletal 14	KRT14	P02533	Up
			Vimentin	VIM	P08670	Up
			Serum amyloid P-component	APCS PTX2	P02743	Up
			Keratin, type I cytoskeletal 13	KRT13	P13646	Up
			Eukaryotic translation initiation factor 3 subunit F	EIF3F EIF3S5	O00303	Up
			Heterogeneous nuclear ribonucleoprotein D0	HNRNPD AUF1 HNRPD	Q14103	Up
			Sperm surface protein Sp17	SPA17 SP17	Q15506	Up
			Myeloblastin	PRTN3 MBN	P24158	Up
			T-complex protein 1 subunit zeta-2	CCT6B	Q92526	Up
			Keratin, type II cytoskeletal 5	KRT5	P13647	Up
			Keratin, type II cytoskeletal 4	KRT4 CYK4	P19013	Up
			Transketolase-like protein 2	TKTL2	Q9H0I9	Up
			Ras-related protein Rab-2A	RAB2A RAB2	P61019	Up
			V-type proton ATPase subunit E 2	ATP6V1E2 ATP6E1 ATP6EL2 ATP6V1EL2	Q96A05	Up
			Heat shock protein beta-1	HSPB1 HSP27 HSP28	P04792	Up
			Maestro heat-like repeat-containing protein family member 7	MROH7 C1orf175 HEATR8	Q68CQ1	Up
			Dolichyl-diphosphooligosaccharide--protein glycosyltransferase 48 kDa subunit	DDOST KIAA0115 OST48 OK/SW-cl.45	P39656	Up
			Triosephosphate isomerase	TPI1 TPI	P60174	Up
			S-phase kinase-associated protein 1	SKP1 EMC19 OCP2 SKP1A TCEB1L	P63208	Up
			Alpha-crystallin B chain	CRYAB CRYA2 HSPB5	P02511	Up
			ATP synthase subunit beta, mitochondrial	ATP5F1B ATP5B ATPMB ATPSB	P06576	Up
			Mitochondrial pyruvate carrier 2	MPC2 BRP44	O95563	Up
			Prelamin-A/C	LMNA LMN1	P02545	Up
			Transmembrane emp24 domain-containing protein 10	TMED10 TMP21	P49755	Up
			60 kDa heat shock protein, mitochondrial	HSPD1 HSP60	P10809	Up
			Nardilysin	NRDC NRD1	O43847	Up
			Dihydrolipoyllysine-residue succinyltransferase component of 2-oxoglutarate dehydrogenase complex, mitochondrial	DLST DLTS	P36957	Up
			T-complex protein 1 subunit zeta	CCT6A CCT6 CCTZ	P40227	Up
			Elongation factor 1-delta	EEF1D EF1D	P29692	Up
			Moesin	MSN	P26038	Up
			Elongation factor 1-gamma	EEF1G EF1G PRO1608	P26641	Up
			Basic leucine zipper and W2 domain-containing protein 1	BZW1 BZAP45 KIAA0005	Q7L1Q6	Up
			BAG family molecular chaperone regulator 2	BAG2	O95816	Up
			Ferritin, mitochondrial	FTMT	Q8N4E7	Up
			Erlin-2	ERLIN2 C8orf2 SPFH2 UNQ2441/PRO5003/PRO9924	O94905	Up
			Cytochrome b-c1 complex subunit Rieske, mitochondrial	UQCRFS1	P47985	Up
			NADH dehydrogenase [ubiquinone] iron-sulfur protein 3, mitochondrial	NDUFS3	O75489	Up
			Synaptophysin-like protein 1	SYPL1 SYPL	Q16563	Up
			Thioredoxin reductase 1, cytoplasmic	TXNRD1 GRIM12 KDRF	Q16881	Up
			26S proteasome non-ATPase regulatory subunit 8	PSMD8	P48556	Up
			Eukaryotic translation elongation factor 1 epsilon-1	EEF1E1 AIMP3 P18	O43324	Up
			Voltage-dependent calcium channel subunit alpha-2/delta-2	CACNA2D2 KIAA0558	Q9NY47	Up
			Dihydrolipoyl dehydrogenase, mitochondrial	DLD GCSL LAD PHE3	P09622	Up
			Nucleoporin p54	NUP54	Q7Z3B4	Up
			Glypican-4	GPC4 UNQ474/PRO937	O75487	Up
			Dolichyl-diphosphooligosaccharide--protein glycosyltransferase subunit 2	RPN2	P04844	Up
			Heterogeneous nuclear ribonucleoproteins A2/B1	HNRNPA2B1 HNRPA2B1	P22626	Up
			Single-stranded DNA-binding protein, mitochondrial	SSBP1 SSBP	Q04837	Up
			ATP synthase subunit alpha, mitochondrial	ATP5F1A ATP5A ATP5A1 ATP5AL2 ATPM	P25705	Up
			Spermatid-associated protein	CBY2 SPERT	Q8NA61	Up
			Nucleoporin p58/p45	NUP58 KIAA0410 NUPL1	Q9BVL2	Up
			Septin-4	SEPTIN4 ARTS C17orf47 PNUTL2 SEP4 SEPT4 hucep-7	O43236	Up
			T-complex protein 1 subunit beta	CCT2 99D8.1 CCTB	P78371	Up
			Keratin, type II cytoskeletal 2 epidermal	KRT2 KRT2A KRT2E	P35908	Up
			Receptor expression-enhancing protein 6	REEP6 C19orf32 DP1L1	Q96HR9	Up
			Fumarate hydratase, mitochondrial	FH	P07954	Up
			Translocon-associated protein subunit alpha	SSR1 TRAPA PSEC0262	P43307	Up
			Leukocyte elastase inhibitor	SERPINB1 ELANH2 MNEI PI2	P30740	Up
			Complement component 1 Q subcomponent-binding protein, mitochondrial	C1QBP GC1QBP HABP1 SF2P32	Q07021	Up
			26S proteasome non-ATPase regulatory subunit 14	PSMD14 POH1	O00487	Up
			Protein phosphatase 1 regulatory subunit 7	PPP1R7 SDS22	Q15435	Up
			Dynein light chain 2, cytoplasmic	DYNLL2 DLC2	Q96FJ2	Up
			NADH-cytochrome b5 reductase 2	CYB5R2	Q6BCY4	Up
			Heat shock protein HSP 90-alpha	HSP90AA1 HSP90A HSPC1 HSPCA	P07900	Up
			2,4-dienoyl-CoA reductase, mitochondrial	DECR1 DECR SDR18C1	Q16698	Up
			Fructose-bisphosphate aldolase C	ALDOC ALDC	P09972	Up
			Translationally-controlled tumor protein	TPT1	P13693	Up
			Synaptojanin-2-binding protein	SYNJ2BP OMP25	P57105	Up
			Hexokinase-1	HK1	P19367	Up
			ADP/ATP translocase 3	SLC25A6 AAC3 ANT3 CDABP0051	P12236	Up
			Enkurin	ENKUR C10orf63	Q8TC29	Up
			DnaJ homolog subfamily B member 1	DNAJB1 DNAJ1 HDJ1 HSPF1	P25685	Up
			Very long-chain specific acyl-CoA dehydrogenase, mitochondrial	ACADVL VLCAD	P49748	Up
			Stomatin-like protein 2, mitochondrial	STOML2 SLP2 HSPC108	Q9UJZ1	Up
			NAD-dependent malic enzyme, mitochondrial	ME2	P23368	Up
			Radial spoke head protein 9 homolog	RSPH9 C6orf206 MRPS18AL1	Q9H1X1	Up
			General vesicular transport factor p115	USO1 VDP	O60763	Up
			T-complex protein 1 subunit alpha	TCP1 CCT1 CCTA	P17987	Up
			Retinoic acid receptor responder protein 1	RARRES1 PEIG1 TIG1	P49788	Up
			Actin-related protein 2/3 complex subunit 4	ARPC4 ARC20	P59998	Up
			Malate dehydrogenase, mitochondrial	MDH2	P40926	Up
			Dynein intermediate chain 2, axonemal	DNAI2	Q9GZS0	Up
			ADP-ribosylation factor 4	ARF4 ARF2	P18085	Up
			Mycophenolic acid acyl-glucuronide esterase, mitochondrial	ABHD10	Q9NUJ1	Up
			Elongation factor 1-beta	EEF1B2 EEF1B EF1B	P24534	Up
			ATP synthase subunit d, mitochondrial	ATP5PD ATP5H My032	O75947	Up
			Calcium-binding tyrosine phosphorylation-regulated protein	CABYR CBP86 FSP2	O75952	Up
			Calnexin	CANX	P27824	Up
			RuvB-like 2	RUVBL2 INO80J TIP48 TIP49B CGI-46	Q9Y230	Up
			Transcription elongation factor B polypeptide 2	ELOB TCEB2	Q15370	Up
			Large proline-rich protein BAG6	BAG6 BAT3 G3	P46379	Up
			Cytochrome b-c1 complex subunit 2, mitochondrial	UQCRC2	P22695	Up
			GrpE protein homolog 1, mitochondrial	GRPEL1 GREPEL1	Q9HAV7	Up
			Enoyl-CoA delta isomerase 1, mitochondrial	ECI1 DCI	P42126	Up
			Trifunctional enzyme subunit beta, mitochondrial	HADHB MSTP029	P55084	Up
			Pyruvate kinase PKM	PKM OIP3 PK2 PK3 PKM2	P14618	Up
			60S acidic ribosomal protein P2	RPLP2 D11S2243E RPP2	P05387	Up
			Tubulin alpha-1A chain	TUBA1A TUBA3	Q71U36	Up
			Beta-galactosidase-1-like protein	GLB1L UNQ229/PRO262	Q6UWU2	Up
			Succinate dehydrogenase [ubiquinone] iron-sulfur subunit, mitochondrial	SDHB SDH SDH1	P21912	Up
			Septin-10	SEPTIN10 SEPT10	Q9P0V9	Up
			Heat shock 70 kDa protein 1-like	HSPA1L	P34931	Up
			26S protease regulatory subunit 6B	PSMC4 MIP224 TBP7	P43686	Up
			Clathrin heavy chain 1	CLTC CLH17 CLTCL2 KIAA0034	Q00610	Up
			T-complex protein 1 subunit delta	CCT4 CCTD SRB	P50991	Up
			26S proteasome non-ATPase regulatory subunit 4	PSMD4 MCB1	P55036	Up
			Calreticulin	CALR CRTC	P27797	Up
			T-complex protein 1 subunit theta	CCT8 C21orf112 CCTQ KIAA0002	P50990	Up
			26S proteasome non-ATPase regulatory subunit 5	PSMD5 KIAA0072	Q16401	Up
			T-complex protein 1 subunit epsilon	CCT5 CCTE KIAA0098	P48643	Up
			26S protease regulatory subunit 7	PSMC2 MSS1	P35998	Up
			Sodium/potassium-transporting ATPase subunit beta-3	ATP1B3	P54709	Up
			Mitochondria-eating protein	SPATA18 MIEAP	Q8TC71	Up
			ATP synthase subunit O, mitochondrial	ATP5PO ATP5O ATPO	P48047	Up
			Reticulocalbin-2	RCN2 ERC55	Q14257	Up
			Serine--tRNA ligase, cytoplasmic	SARS1 SARS SERS	P49591	Up
			26S protease regulatory subunit 6A	PSMC3 TBP1	P17980	Up
			Phosphoglycerate kinase 2	PGK2 PGKB	P07205	Up
			Prohibitin-2	PHB2 BAP REA	Q99623	Up
			DnaJ homolog subfamily A member 2	DNAJA2 CPR3 HIRIP4	O60884	Up
			Aminoacyl tRNA synthase complex-interacting multifunctional protein 1	AIMP1 EMAP2 SCYE1	Q12904	Up
			C-Myc-binding protein	MYCBP AMY1	Q99417	Up
			Coatomer subunit delta	ARCN1 COPD	P48444	Up
			Alpha-centractin	ACTR1A CTRN1	P61163	Up
			RuvB-like 1	RUVBL1 INO80H NMP238 TIP49 TIP49A	Q9Y265	Up
			Tripeptidyl-peptidase 2	TPP2	P29144	Up
			COP9 signalosome complex subunit 8	COPS8 CSN8	Q99627	Up
			60S acidic ribosomal protein P0	RPLP0	P05388	Up
			Retinal dehydrogenase 2	ALDH1A2 RALDH2	O94788	Up
			Transgelin-2	TAGLN2 KIAA0120 CDABP0035	P37802	Up
			Dynein light chain roadblock-type 2	DYNLRB2 DNCL2B DNLC2B ROBLD2	Q8TF09	Up
			40S ribosomal protein S12	RPS12	P25398	Up
			Hyaluronidase PH-20	SPAM1 HYAL3 PH20	P38567	Up
			T-complex protein 1 subunit gamma	CCT3 CCTG TRIC5	P49368	Up
			L-lactate dehydrogenase A chain	LDHA PIG19	P00338	Up
			26S proteasome non-ATPase regulatory subunit 3	PSMD3	O43242	Up
			DnaJ homolog subfamily A member 4	DNAJA4	Q8WW22	Up
			Glyceraldehyde-3-phosphate dehydrogenase	GAPDH GAPD CDABP0047 OK/SW-cl.12	P04406	Up
			Receptor of activated protein C kinase 1	RACK1 GNB2L1 HLC7 PIG21	P63244	Up
			40S ribosomal protein SA	RPSA LAMBR LAMR1	P08865	Up
			Alpha-enolase	ENO1 ENO1L1 MBPB1 MPB1	P06733	Up
			T-complex protein 1 subunit eta	CCT7 CCTH NIP7-1	Q99832	Up
			Casein kinase II subunit beta	CSNK2B CK2N G5A	P67870	Up
			Leucine--tRNA ligase, cytoplasmic	LARS1 KIAA1352 LARS	Q9P2J5	Up
			Ubiquitin thioesterase OTUB1	OTUB1 OTB1 OTU1 HSPC263	Q96FW1	Up
			Bifunctional purine biosynthesis protein PURH	ATIC PURH OK/SW-cl.86	P31939	Up
			EF-hand calcium-binding domain-containing protein 6	EFCAB6 DJBP KIAA1672	Q5THR3	Up
			Ubiquitin carboxyl-terminal hydrolase isozyme L5	UCHL5 UCH37 AD-019 CGI-70	Q9Y5K5	Up
			Adenylate kinase 7	AK7	Q96M32	Up
			Nuclear pore glycoprotein p62	NUP62	P37198	Up
			ATP synthase subunit g, mitochondrial	ATP5MG ATP5L	O75964	Up
			Cilia- and flagella-associated protein 161	CFAP161 C15orf26	Q6P656	Up
			Heterogeneous nuclear ribonucleoprotein K	HNRNPK HNRPK	P61978	Up
			Long-chain-fatty-acid--CoA ligase 1	ACSL1 FACL1 FACL2 LACS LACS1 LACS2	P33121	Up
			Eukaryotic translation initiation factor 3 subunit A	EIF3A EIF3S10 KIAA0139	Q14152	Up
			26S protease regulatory subunit 4	PSMC1	P62191	Up
			Dolichyl-diphosphooligosaccharide--protein glycosyltransferase subunit 1	RPN1	P04843	Up
			Izumo sperm-egg fusion protein 4	IZUMO4 C19orf36 UNQ831/PRO1758	Q1ZYL8	Up
			Cellular retinoic acid-binding protein 2	CRABP2	P29373	Up
			Hsc70-interacting protein	ST13 AAG2 FAM10A1 HIP SNC6	P50502	Up
			Eukaryotic initiation factor 4A-I	EIF4A1 DDX2A EIF4A	P60842	Up
			ATP synthase subunit gamma, mitochondrial	ATP5F1C ATP5C ATP5C1 ATP5CL1	P36542	Up
			Heat shock protein 105 kDa	HSPH1 HSP105 HSP110 KIAA0201	Q92598	Up
			Valine--tRNA ligase	VARS1 G7A VARS VARS2	P26640	Up
			Prohibitin	PHB PHB1	P35232	Up
			Pyruvate dehydrogenase protein X component	PDHX PDX1	O00330	Up
			Tubulin polymerization-promoting protein family member 2	TPPP2 C14orf8	P59282	Up
			Cytochrome b-c1 complex subunit 1, mitochondrial	UQCRC1	P31930	Up
			Tetratricopeptide repeat protein 25	ODAD4 TTC25	Q96NG3	Up
			Fumarylacetoacetate hydrolase domain-containing protein 2A	FAHD2A CGI-105	Q96GK7	Up
			Alanyl-tRNA editing protein Aarsd1	AARSD1	Q9BTE6	Up
			Isoleucine--tRNA ligase, cytoplasmic	IARS1 IARS	P41252	Up
			Voltage-dependent anion-selective channel protein 1	VDAC1 VDAC	P21796	Up
			Heat shock-related 70 kDa protein 2	HSPA2	P54652	Up
			SRSF protein kinase 1	SRPK1	Q96SB4	Up
			Dynein heavy chain 17, axonemal	DNAH17 DNAHL1 DNEL2	Q9UFH2	Up
			Adipocyte plasma membrane-associated protein	APMAP C20orf3 UNQ1869/PRO4305	Q9HDC9	Up
			Fructose-bisphosphate aldolase A	ALDOA ALDA	P04075	Up
			Dual specificity mitogen-activated protein kinase kinase 1	MAP2K1 MEK1 PRKMK1	Q02750	Up
			UPF0160 protein MYG1, mitochondrial (renamed as MYG1 exonuclease)	MYG1 C12orf10	Q9HB07	Up
			Protein arginine N-methyltransferase 5	PRMT5 HRMT1L5 IBP72 JBP1 SKB1	O14744	Up
			Protein SGT1 homolog	SUGT1	Q9Y2Z0	Up
			40S ribosomal protein S3	RPS3 OK/SW-cl.26	P23396	Up
			Apoptosis-inducing factor 1, mitochondrial	AIFM1 AIF PDCD8	O95831	Up
			UTP--glucose-1-phosphate uridylyltransferase	UGP2 UGP1	Q16851	Up
			Unconventional myosin-VI	MYO6 KIAA0389	Q9UM54	Up
			Lon protease homolog, mitochondrial	LONP1 PRSS15	P36776	Up
			26S proteasome non-ATPase regulatory subunit 13	PSMD13	Q9UNM6	Up
			Pachytene checkpoint protein 2 homolog	TRIP13 PCH2	Q15645	Up
			Radial spoke head protein 6 homolog A	RSPH6A RSHL1	Q9H0K4	Up
			Actin, cytoplasmic 2	ACTG1 ACTG	P63261	Up
			Translin	TSN	Q15631	Up
			Proteasome subunit beta type-4	PSMB4 PROS26	P28070	Up
			Mitochondrial thiamine pyrophosphate carrier	SLC25A19 DNC MUP1	Q9HC21	Up
			Myeloid leukemia factor 1	MLF1	P58340	Up
			Exportin-2	CSE1L CAS XPO2	P55060	Up
			Voltage-gated hydrogen channel 1	HVCN1 VSOP UNQ578/PRO1140	Q96D96	Up
			Gamma-glutamyl hydrolase	GGH	Q92820	Up
			3'(2')5'-bisphosphate nucleotidase 1	BPNT1	O95861	Up
			Cytosolic acyl coenzyme A thioester hydrolase	ACOT7 BACH	O00154	Up
			Apolipoprotein A-I	APOA1	P02647	Up
			3-ketoacyl-CoA thiolase, mitochondrial	ACAA2	P42765	Up
			Ubiquitin carboxyl-terminal hydrolase isozyme L3	UCHL3	P15374	Up
			Adenylate kinase isoenzyme 1	AK1	P00568	Up
			Radial spoke head 14 homolog	RSPH14 RTDR1	Q9UHP6	Up
			Multifunctional protein ADE2	PAICS ADE2 AIRC PAIS	P22234	Up
			Glutamine--fructose-6-phosphate aminotransferase [isomerizing] 1	GFPT1 GFAT GFPT	Q06210	Up
			Vacuolar protein sorting-associated protein 35	VPS35 MEM3 TCCCTA00141	Q96QK1	Up
			Aspartate aminotransferase, mitochondrial	GOT2 KYAT4	P00505	Up
			Signal peptidase complex catalytic subunit SEC11A	SEC11A SEC11L1 SPC18 SPCS4A	P67812	Up
			Dynactin subunit 4	DCTN4	Q9UJW0	Up
			Nicotinamide phosphoribosyltransferase	NAMPT PBEF PBEF1	P43490	Up
			Ras-related protein Rab-14	RAB14	P61106	Up
			ATP-dependent RNA helicase DDX3Y	DDX3Y DBY	O15523	Up
			Calcium-binding and spermatid-specific protein 1	CABS1 C4orf35	Q96KC9	Up
			Coronin-1B	CORO1B	Q9BR76	Up
			26S proteasome non-ATPase regulatory subunit 11	PSMD11	O00231	Up
			26S proteasome non-ATPase regulatory subunit 12	PSMD12	O00232	Up
			Methionine--tRNA ligase, cytoplasmic	MARS1 MARS	P56192	Up
			Nucleosome assembly protein 1-like 1	NAP1L1 NRP	P55209	Up
			Carnitine O-acetyltransferase	CRAT CAT1	P43155	Up
			Medium-chain specific acyl-CoA dehydrogenase, mitochondrial	ACADM	P11310	Up
			Casein kinase II subunit alpha	CSNK2A1 CK2A1	P68400	Up
			Ras-related protein Rab-6A	RAB6A RAB6	P20340	Up
			Calmin	CLMN KIAA1188	Q96JQ2	Up
			Proteasome subunit beta type-2	PSMB2	P49721	Up
			Cytochrome c oxidase subunit 5B, mitochondrial	COX5B	P10606	Up
			Protein-L-isoaspartate(D-aspartate) O-methyltransferase	PCMT1	P22061	Up
			Nucleoside diphosphate kinase 7	NME7	Q9Y5B8	Up
			Protein disulfide-isomerase A6	PDIA6 ERP5 P5 TXNDC7	Q15084	Up
			Dynactin subunit 2	DCTN2 DCTN50	Q13561	Up
			Leukocyte surface antigen CD47	CD47 MER6	Q08722	Up
			Ubiquitin carboxyl-terminal hydrolase 7	USP7 HAUSP	Q93009	Up
			Adenylate kinase 8	AK8 C9orf98	Q96MA6	Up
			Heat shock protein HSP 90-beta	HSP90AB1 HSP90B HSPC2 HSPCB	P08238	Up
			Endophilin-B1	SH3GLB1 KIAA0491 CGI-61	Q9Y371	Up
			MICOS complex subunit MIC19	CHCHD3 MIC19 MINOS3	Q9NX63	Up
			Elongation factor 2	EEF2 EF2	P13639	Up
			ATP-dependent 6-phosphofructokinase	PFKP PFKF	Q01813	Up
			Ran-specific GTPase-activating protein	RANBP1	P43487	Up
			Pyruvate dehydrogenase E1 component subunit alpha	PDHA1 PHE1A	P08559	Up
			cAMP-dependent protein kinase type II-alpha regulatory subunit	PRKAR2A PKR2 PRKAR2	P13861	Up
			Tektin-1	TEKT1	Q969V4	Up
			Parkin coregulated gene protein	PACRG GLUP	Q96M98	Up
			Peptidyl-prolyl cis-trans isomerase FKBP3	FKBP3 FKBP25	Q00688	Up
			Nuclear migration protein nudC	NUDC	Q9Y266	Up
			Vesicle-associated membrane protein 3	VAMP3 SYB3	Q15836	Up
			Heat shock 70 kDa protein 4L	HSPA4L APG1 OSP94	O95757	Up
			AP-2 complex subunit beta	AP2B1 ADTB2 CLAPB1	P63010	Up
			Cilia- and flagella-associated protein 52	CFAP52 WDR16 WDRPUH	Q8N1V2	Up
			Stathmin	STMN1 C1orf215 LAP18 OP18	P16949	Up
			Annexin A1	ANXA1 ANX1 LPC1	P04083	Up
			Leucine zipper transcription factor-like protein 1	LZTFL1	Q9NQ48	Up
			Glycine--tRNA ligase	GARS1 GARS	P41250	Up
			26S protease regulatory subunit 8	PSMC5 SUG1	P62195	Up
			Transitional endoplasmic reticulum ATPase	VCP	P55072	Up
			Nuclear transport factor 2	NUTF2 NTF2	P61970	Up
			Septin-7	SEPTIN7 CDC10 SEPT7	Q16181	Up
			Vacuolar protein sorting-associated protein 13A	VPS13A CHAC KIAA0986	Q96RL7	Up
			UPF0587 protein C1orf123	CZIB C1orf123	Q9NWV4	Up
			Myosin-10	MYH10	P35580	Up
			Vesicle-fusing ATPase	NSF	P46459	Up
			Radial spoke head 1 homolog	RSPH1 TSA2 TSGA2	Q8WYR4	Up
			Ras-related protein Rab-11B	RAB11B YPT3	Q15907	Up
			Dynein heavy chain 8, axonemal	DNAH8	Q96JB1	Up
			DnaJ homolog subfamily B member 6	DNAJB6 HSJ2 MRJ MSJ1	O75190	Up
			Proteasome subunit alpha type-5	PSMA5	P28066	Up
			Eukaryotic peptide chain release factor subunit 1	ETF1 ERF1 RF1 SUP45L1	P62495	Up
			26S proteasome non-ATPase regulatory subunit 2	PSMD2 TRAP2	Q13200	Up
			Gelsolin	GSN	P06396	Up
			Glutamine--tRNA ligase	QARS1 QARS	P47897	Up
			Apolipoprotein A-IV	APOA4	P06727	Up
			Sodium/potassium-transporting ATPase subunit alpha-4	ATP1A4 ATP1AL2	Q13733	Up
			Polyadenylate-binding protein 1	PABPC1 PAB1 PABP1 PABPC2	P11940	Up
			cAMP-dependent protein kinase catalytic subunit alpha	PRKACA PKACA	P17612	Up
			Bifunctional glutamate/proline--tRNA ligase	EPRS1 EPRS GLNS PARS QARS QPRS PIG32	P07814	Up
			Translin-associated protein X	TSNAX TRAX	Q99598	Up
			Protein phosphatase 1G	PPM1G PPM1C	O15355	Up
			ADP-ribosylation factor-like protein 3	ARL3 ARFL3	P36405	Up
			Cysteine--tRNA ligase, cytoplasmic	CARS1 CARS	P49589	Up
			Actin-related protein 3	ACTR3 ARP3	P61158	Up
			Glycogen phosphorylase, liver form	PYGL	P06737	Up
			Endoplasmic reticulum resident protein 44	ERP44 KIAA0573 TXNDC4 UNQ532/PRO1075	Q9BS26	Up
			Isocitrate dehydrogenase [NAD] subunit beta, mitochondrial	IDH3B	O43837	Up
			6-phosphogluconate dehydrogenase	PGD PGDH	P52209	Up
			Nuclear pore complex protein Nup93	NUP93 KIAA0095	Q8N1F7	Up
			Serine/threonine-protein phosphatase 2A 65 kDa regulatory subunit A alpha isoform	PPP2R1A	P30153	Up
			60S ribosomal protein L11	RPL11	P62913	Up
			Proteasome subunit alpha type-6	PSMA6 PROS27	P60900	Up
			Eukaryotic translation initiation factor 3 subunit B	EIF3B EIF3S9	P55884	Up
			Dynactin subunit 1	DCTN1	Q14203	Up
			Tryptophan--tRNA ligase, cytoplasmic	WARS1 IFI53 WARS WRS	P23381	Up
			Proteasome subunit alpha type-3	PSMA3 HC8 PSC8	P25788	Up
			Proteasome subunit alpha type-4	PSMA4 HC9 PSC9	P25789	Up
			Macrophage-capping protein	CAPG AFCP MCP	P40121	Up
			Staphylococcal nuclease domain-containing protein 1	SND1 TDRD11	Q7KZF4	Up
			Aspartate--tRNA ligase, cytoplasmic	DARS1 DARS PIG40	P14868	Up
			Electron transfer flavoprotein subunit beta	ETFB FP585	P38117	Up
			Cilia- and flagella-associated protein 58	CFAP58 C10orf80 CCDC147	Q5T655	Up
			14-3-3 protein zeta/delta	YWHAZ	P63104	Up
			Dynein intermediate chain 1, axonemal	DNAI1	Q9UI46	Up
			Protein FAM71E2	FAM71E2 C19orf16	Q8N5Q1	Up
			Phosphatidylinositol transfer protein alpha isoform	PITPNA PITPN	Q00169	Up
			Nuclear pore complex protein Nup155	NUP155 KIAA0791	O75694	Up
			Arginine--tRNA ligase, cytoplasmic	RARS1 RARS	P54136	Up
			Syntaxin-12	STX12	Q86Y82	Up
			cAMP-dependent protein kinase type I-alpha regulatory subunit	PRKAR1A PKR1 PRKAR1 TSE1	P10644	Up
			Adenylyl cyclase-associated protein 1	CAP1 CAP	Q01518	Up
			Lysine--tRNA ligase (renamed as Tyrosine-protein kinase SYK)	KARS1 KARS KIAA0070	Q15046	Up
			Phenylalanine--tRNA ligase beta subunit	FARSB FARSLB FRSB HSPC173	Q9NSD9	Up
			26S proteasome non-ATPase regulatory subunit 1	PSMD1	Q99460	Up
			ATP-dependent (S)-NAD(P)H-hydrate dehydratase	NAXD CARKD	Q8IW45	Up
			Proteasome subunit beta type-1	PSMB1 PSC5	P20618	Up
Carvalho et al. 2021 [34]	Rat	Washed with centrifugation	Outer dense fiber protein 2	Odf2	A0A0H2UHM4	Down
			Phosphoglycerate kinase	RGD1560402	M0R6Y8	Down
			ATP synthase subunit beta	Atp5f1b Atp5b rCG_42467	G3V6D3	Down
			Tubulin beta chain	Tubb4b	G3V7C6	Down
			Glyceraldehyde-3-phosphate dehydrogenase	Gapdhs rCG_54229	B1WBQ8	Down
			outer dense fiber of sperm tails 2, isoform CRA_e	Odf2 rCG_45844	G3V7X0	Down
			Protein/nucleic acid deglycase DJ-1 (renamed as Parkinson disease protein 7 homolog)	Park7 Cap1	O88767	Down
			CD177 antigen-like	LOC100909620 LOC100909662 LOC102553892 RGD1564380	M0R4W1	Down
			Tubulin beta-4B chain	Tubb4b	Q6P9T8	Down
			Keratin, type II cytoskeletal 5	Krt5 LOC102551453	A0A0G2K509	Down
			Lysozyme c (renamed as Sperm acrosome membrane-associated protein 3)	Spaca3 Lyzc Spaca3_predicted rCG_32436	F1M6E7	Down
			Cytochrome c, testis-specific	Cyct	P10715	Down
			Ras-related protein rab-2 A	Rab2a	F1LP82	Up
			DLAT protein (renamed as Dihydrolipoyllysine-residue acetyltransferase component of pyruvate dehydrogenase complex, mitochondrial)	Dlat	P08461	Up
			Globin c2	Hba-a2 Glnc2 Hba2 rCG_34342	A0A0G2JSV6	Up
Tobacco smoking
References	Species	Working sample	Protein namea	Gene name	Uniprot KB accession numberb	Protein variationc
Gerhard et al. 1989 [60]	Human	Semen	Acrosin	ACR ACRS	P10323	Down (activity)
El Mulla et al. 1995 [120]	Human	Spermatozoa	Acrosin	ACR ACRS	P10323	Down (activity)
Zhang et al. 2000 [114]	Human	Seminal plasma	superoxide dismutase	SOD1	P00441	Down
Kiziler et al. 2007 [115]	Human	Seminal plasma	gluthatione-S-transferase	GSTA1	P08263 (selected)	Down (activity)
Elshal et al. 2000 [116]	Human	Seminal plasma	superoxide dismutase	SOD1	P00441	Down (activity)
			Catalase	CAT	P04040	Down (activity)
Kumosani et al. 2008 [61]	Human	Seminal plasma	Plasma membrane Ca2+-ATPase	ATP2B4 ATP2B2 MXRA1	P23634 (selected)	Down (activity)
El-Megely and Ali 2011 [53]	Human	Seminal liquid	Fas/Apo-1 (renamed as Tumor necrosis factor receptor superfamily member 6)	FAS APT1 FAS1 TNFRSF6	P25445	Up
			Caspase 3	CASP3 CPP32	P42574	Up (activity)
Ghaffari et al. 2013 [62]	Human	Semen (pellet)	creatine kinase	CKM CKMM	P06732 (selected)	Down (activity)
Yu et al. 2013 [117]	Human	Seminal plasma	superoxide dismutase	SOD1	P00441	Down (activity)
Chen et al. 2015 [35]	Mouse	Spermatozoa	Fructose-bisphosphate aldolase A (EC 4.1.2.13) (Aldolase 1) (Muscle-type aldolase)	Aldoa	P05064	Up
			1700065I17Rik (renamed as Testis specific expressed protein 7)	Tex43 1700065I17Rik Tseg7	C9W8M4	Up
			60 kDa heat shock protein, mitochondrial (EC 5.6.1.7) (60 kDa chaperonin) (Chaperonin 60) (CPN60) (HSP-65) (Heat shock protein 60) (HSP-60) (Hsp60) (Mitochondrial matrix protein P1)	Hspd1 Hsp60	P63038	Up
			Adenylate kinase isoenzyme 1 (AK 1) (EC 2.7.4.3) (EC 2.7.4.6) (ATP-AMP transphosphorylase 1) (ATP:AMP phosphotransferase) (Adenylate monophosphate kinase) (Myokinase)	Ak1	Q9R0Y5	Up
			Glutathione S-transferase Mu 2	Gstm2	P15626	Up
			Nebulin-related-anchoring protein (N-RAP)	Nrap	Q80XB4	Up
			Outer dense fiber protein 1	Odf1	Q61999	Up
			Peroxiredoxin-1 (EC 1.11.1.24) (Macrophage 23 kDa stress protein) (Osteoblast-specific factor 3) (OSF-3) (Thioredoxin peroxidase 2) (Thioredoxin-dependent peroxide reductase 2) (Thioredoxin-dependent peroxiredoxin 1)	Prdx1	P35700	Up
			Sulfotransferase 1C2 (ST1C2) (EC 2.8.2.-)	Sult1c2	Q9D939	Up
			Tubulin beta-4B chain (Tubulin beta-2C chain)	Tubb2c	P68372	Up
			ATP synthase subunit alpha, mitochondrial (ATP synthase F1 subunit alpha)	ATP5a1	Q03265	Down
			Citrate synthase, mitochondrial (EC 2.3.3.1) (Citrate (Si)-synthase)	Cs	Q9CZU6	Down
			Cytochrome b5 domain-containing protein 1	Cyb5d1	Q5NCY3	Down
			Glycerol-3-phosphate dehydrogenase, mitochondrial (GPD-M) (GPDH-M) (EC 1.1.5.3) (Protein TISP38)	Gpd2	Q64521	Down
			NADH dehydrogenase [ubiquinone] 1 beta subcomplex subunit 10 (Complex I-PDSW) (CI-PDSW) (NADH-ubiquinone oxidoreductase PDSW subunit)	Ndufb10	Q9DCS9	Down
			Outer dense fiber protein 2 (84 kDa outer dense fiber protein) (Cenexin) (Outer dense fiber of sperm tails protein 2)	Odf2	A3KGV1	Down
			Phospholipid hydroperoxide glutathione peroxidase (PHGPx) (EC 1.11.1.12) (Glutathione peroxidase 4) (GPx-4) (GSHPx-4)	Gpx4	O70325	Down
			Pyruvate dehydrogenase E1 component subunit alpha, testis-specific form, mitochondrial (EC 1.2.4.1) (PDHE1-A type II)	Pdha2	P35487	Down
			Speriolin (Spermatogenesis and centriole-associated protein 1) (Spermatogenic cell-specific Cdc20-binding protein)	Spatc1	Q148B6	Down
			Sperm mitochondrial-associated cysteine-rich protein	Smcp	P15265	Down
			Spermatogenesis-associated protein 22	spata22	Q5SV06	Down
			Tubulin alpha-3 chain (Alpha-tubulin 3/7) (Alpha-tubulin isotype M-alpha-3/7) (Tubulin alpha-3/alpha-7 chain) [Cleaved into: Detyrosinated tubulin alpha-3 chain]	Tuba3b	P05214	Down
Antoniassi et al. 2016 [48]	Human	Seminal plasma	Mammaglobin-B (Lacryglobin) (Lipophilin-C) (Mammaglobin-2) (Secretoglobin family 2A member 1)	SCGB2A1	O75556	absent
			Immunoglobulin lambda constant 3 (Ig lambda chain C region DOT) (Ig lambda chain C region NEWM) (Ig lambda-3 chain C regions)	IGLC3	P0DOY3	Up
			Immunoglobulin heavy constant alpha 1 (Ig alpha-1 chain C region) (Ig alpha-1 chain C region BUR) (Ig alpha-1 chain C region TRO)	IGHA1	P01876	Up
			Apolipoprotein A-I (Apo-AI) (ApoA-I) (Apolipoprotein A1) [Cleaved into: Proapolipoprotein A-I (ProapoA-I); Truncated apolipoprotein A-I (Apolipoprotein A-I(1-242))]	APOA1	P02647	Up
			Protein S100-A9 (Calgranulin-B) (Calprotectin L1H subunit) (Leukocyte L1 complex heavy chain) (Migration inhibitory factor-related protein 14) (MRP-14) (p14) (S100 calcium-binding protein A9)	S100A9	P06702	Up
			Alpha-1-acid glycoprotein 1 (AGP 1) (Orosomucoid-1) (OMD 1)	ORM1	P02763	Up
			Neutrophil gelatinase-associated lipocalin (NGAL) (25 kDa alpha-2-microglobulin-related subunit of MMP-9) (Lipocalin-2) (Oncogene 24p3) (Siderocalin) (p25)	LCN2	P80188	Up
			Prolargin (Proline-arginine-rich end leucine-rich repeat protein)	PRELP	P51888	Down
			Poly(rC)-binding protein 1 (Alpha-CP1) (Heterogeneous nuclear ribonucleoprotein E1) (hnRNP E1) (Nucleic acid-binding protein SUB2.3)	PCBP1	Q15365	Down
			Bile salt-activated lipase (BAL) (EC 3.1.1.13) (EC 3.1.1.3) (EC 3.1.1.6) (Bile salt-stimulated lipase) (BSSL) (Bucelipase) (Carboxyl ester lipase) (Cholesterol esterase) (Pancreatic lysophospholipase) (Sterol esterase)	CEL	P19835	Down
			Carbonyl reductase [NADPH] 1 (EC 1.1.1.184) (15-hydroxyprostaglandin dehydrogenase [NADP(+)]) (EC 1.1.1.196) (EC 1.1.1.197) (20-beta-hydroxysteroid dehydrogenase) (NADPH-dependent carbonyl reductase 1) (Prostaglandin 9-ketoreductase) (PG-9-KR) (Prostaglandin-E(2) 9-reductase) (EC 1.1.1.189) (Short chain dehydrogenase/reductase family 21C member 1)	CBR1	P16152	Down
			Phospholipase A2, membrane associated (EC 3.1.1.4) (GIIC sPLA2) (Group IIA phospholipase A2) (Non-pancreatic secretory phospholipase A2) (NPS-PLA2) (Phosphatidylcholine 2-acylhydrolase 2A)	PLA2G2A	P14555	Down
			CD44 antigen (CDw44) (Epican) (Extracellular matrix receptor III) (ECMR-III) (GP90 lymphocyte homing/adhesion receptor) (HUTCH-I) (Heparan sulfate proteoglycan) (Hermes antigen) (Hyaluronate receptor) (Phagocytic glycoprotein 1) (PGP-1) (Phagocytic glycoprotein I) (PGP-I) (CD antigen CD44)	CD44	P16070	Down
			MAM domain-containing protein 2 (MAM domain-containing proteoglycan) (Mamcan)	MAMDC2	Q7Z304	Down
			Epididymal secretory protein E3-alpha (Human epididymis-specific protein 3-alpha) (HE3-alpha)	EDDM3A	Q14507	Down
			G-protein coupled receptor 64 (renamed as Adhesion G-protein coupled receptor G2)	ADGRG2 GPR64 HE6 TM7LN2	Q8IZP9	Down
			Probable serine carboxypeptidase CPVL (EC 3.4.16.-) (Carboxypeptidase, vitellogenic-like) (Vitellogenic carboxypeptidase-like protein) (VCP-like protein) (hVLP)	CPVL	Q9H3G5	Down
			Beta-galactosidase (EC 3.2.1.23) (Acid beta-galactosidase) (Lactase) (Elastin receptor 1)	GLB1	P16278	Down
			Collagen alpha-1(XVIII) chain [Cleaved into: Endostatin; Non-collagenous domain 1 (NC1)]	COL18A1	P39060	Down
			Fatty acid synthase (EC 2.3.1.85) (Type I fatty acid synthase) [Includes: [Acyl-carrier-protein] S-acetyltransferase (EC 2.3.1.38); [Acyl-carrier-protein] S-malonyltransferase (EC 2.3.1.39); 3-oxoacyl-[acyl-carrier-protein] synthase (EC 2.3.1.41); 3-oxoacyl-[acyl-carrier-protein] reductase (EC 1.1.1.100); 3-hydroxyacyl-[acyl-carrier-protein] dehydratase (EC 4.2.1.59); Enoyl-[acyl-carrier-protein]…	FASN	P49327	Down
			Galectin-3 (Gal-3) (35 kDa lectin) (Carbohydrate-binding protein 35) (CBP 35) (Galactose-specific lectin 3) (Galactoside-binding protein) (GALBP) (IgE-binding protein) (L-31) (Laminin-binding protein) (Lectin L-29) (Mac-2 antigen)	LGALS3	P17931	Down
			Endoplasmin (94 kDa glucose-regulated protein) (GRP-94) (Heat shock protein 90 kDa beta member 1) (Tumor rejection antigen 1) (gp96 homolog)	HSP90B1	P14625	Down
			Matrix protein 2	M	P0DOF5	Down
			Nucleotide exchange factor SIL1 (BiP-associated protein) (BAP)	SIL1	Q9H173	Down
			Clusterin (Aging-associated gene 4 protein) (Apolipoprotein J) (Apo-J) (Complement cytolysis inhibitor) (CLI) (Complement-associated protein SP-40,40) (Ku70-binding protein 1) (NA1/NA2) (Sulfated glycoprotein 2) (SGP-2) (Testosterone-repressed prostate message 2) (TRPM-2) [Cleaved into: Clusterin beta chain (ApoJalpha) (Complement cytolysis inhibitor a chain); Clusterin alpha chain (ApoJbeta) (Co…	CLU	P10909	Down
Cui et al. 2016 [55]	Human	Spermatozoa	Acrosin	ACR ACRS	P10323	Down (activity)
		Sperm pellet	Checkpoint kinase 1	CHEK1 CHK1	O14757	Down
Aboulmaouahib et al. 2018 [119]	Human	Spermatozoa	Catalase	CAT	P04040	Up (activity)
			superoxide dismutase	SOD1	P00441	Up (activity)
			glutathione reductase	GSR GLUR GRD1	P00390 (selected)	Up (activity)
Bisphenol-A exposure
References	Species	Working sample	Protein namea	Gene name	Uniprot KB accession numberb	Protein variationc
Rahman et al. 2015 [135]	Mouse	Spermatozoa	beta-Actin	Actb	P60710 (selected)	Down
			Peroxiredoxin-5, mitochondrial	Prdx5 Prdx6	P99029	Up
			Glutathione peroxidase 4	Gpx4	O70325	Up
			Glyceraldehyde-3-phosphate dehydrogenase, testis-specific	Gapdh Gapd	Q64467	Up
			Succinate deshydrogenase	Sdhb	P21912	Up
Barbonetti et al. 2016 [63]	Human	Spermatozoa	Caspase 3	CASP3 CPP32	P42574	Up (activity)
			Caspase 9	CASP9 MCH6	P55211	Up (activity)
Rahman et al. 2016 [50]	Mouse	Spermatozoa	ATP synthase subunit d, mitochondrial	Atp5pd Atp5h	Q9DCX2	Down
			ATP synthase subunit O, mitochondrial	Atp5po Atp5o D12Wsu28e	Q9DB20	Down
			Trifunctional enzyme subunit alpha, mitochondrial	Hadha	Q8BMS1	Down
			Cytochrome c oxidase subunit 6A1, mitochondrial	Cox6a1 Cox6al	P43024	Down
			Phosphoglycerate mutase 2	Pgam2	O70250	Down
			Succinyl-CoA:3-ketoacid coenzyme A transferase 2A, mitochondrial	Oxct2a	Q9JJN4	Down
			Isochorismatase domain-containing protein 2A, mitochondrial	Isoc2a Isoc2	P85094	Down
			Ropporin-1	Ropn1	Q9ESG2	Down
			Actin, cytoplasmic 1	Actb	P60710	Down
			Fatty acid-binding protein 9	Fabp9 Perf15 Tlbp	O08716	Down
			Outer dense fiber protein 2	Odf2 Odf84	A3KGV1	Down
			Prohibitin	Phb	P67778	Down
			Serine/threonine-protein phosphatase PP1-alpha catalytic subunit	Ppp1ca Ppp1a	P62137	Down
			Dynein light chain 1, axonemal	Dnal1 Dnalc1	Q05A62	Down
			Glutathione S-transferase Mu 5	Gstm5 Fsc2 Gstm3	P48774	Down
			Glyceraldehyde-3-phosphate dehydrogenase, testis-specific	Gapdh Gapd	Q64467	Up
			Adenylate kinase 2, mitochondrial isoform	Ak2	Q9WTP6	Up
			Succinate dehydrogenase Ip subunit	Sdhb	Q9CQA3	Up
			Cytochrome b-c1 complex subunit Rieske, mitochondrial	Uqcrfs1	Q9CR68	Up
			Peroxisomal membrane protein 20 (renamed as Peroxiredoxin-5, mitochondrial)	PMP20	P99029	Up
			Isoaspartyl peptidase/L-asparaginase	Asrgl1	Q8C0M9	Up
			Sperm surface protein Sp17	Spa17 Sp17	Q62252	Up
			Glutathione peroxidase 4	Gpx4	O70325	Up
			Peroxiredoxin-5, mitochondrial	Prdx5 Prdx6	P99029	Up
Rahman et al. 2017 [130]	Mouse	Spermatozoa	Phospholipid hydroperoxide glutathione peroxidase	Gpx4	O70325	Down
			ATP synthase subunit O, mitochondrial	Atp5po Atp5o D12Wsu28e	Q9DB20	Down
			Glutathione S-transferase Mu 5	Gstm5 Fsc2 Gstm3	P48774	Down
			NADH dehydrogenase [ubiquinone] 1 alpha subcomplex subunit 10, mitochondrial	Ndufa10	Q99LC3	Down
			Isoaspartyl peptidase/L-asparaginase	Asrgl1	Q8C0M9	Up
			Superoxide dismutase [Mn], mitochondrial	Sod2 Sod-2	P09671	Up
Rahman et al. 2018 [131]	Mouse	Capacitated spermatozoa	Cytochrome c1, heme protein, mitochondrial	Cyc1	Q9D0M3	Down
			Steroid dehydrogenase (renamed as (3R)-3-hydroxyacyl-CoA dehydrogenase)	Hsd17b8	P50171	Down
			Adenylate kinase isozyme 2, mitochondrial	Ak2	Q9WTP6	Down
			NADH dehydrogenase [ubiquinone] 1 alpha subcomplex subunit 13	Ndufa13 Grim19	Q9ERS2	Down
			ATP synthase subunit O, mitochondrial	Atp5po Atp5o D12Wsu28e	Q9DB20	Down
			Actin-related protein T3	Actrt3 Arpm1	Q8BXF8	Down
			Outer dense fiber protein	Odf2 Odf84	A3KGV1	Down
			Peroxiredoxin-5, mitochondrial	Prdx5 Prdx6	P99029	Down
			Superoxide dismutase [Mn], mitochondrial	Sod2 Sod-2	P09671	Down
			Prohibitin	Phb	P67778	Down
			Ras-related protein Rab-2A	Rab2a Rab2	P53994	Down
			Cytochrome c oxidase subunit 5B, mitochondrial	Cox5b	P19536	Up
			Triosephosphate isomerase	Tpi1 Tpi	P17751	Up
			Ropporin-1	Ropn1	Q9ESG2	Up
			Fatty acid-binding protein 9	Fabp9 Perf15, Tlbp	O08716	Up
Rahman et al. 2020 [143]	Mouse	Spermatozoa	Lactate deshydrogenase	Ldha Ldh-1 Ldh1	P06151 (selected)	Up
For some studies, the number of proteins differentially expressed presented in this table may be different to the number highlighted in the original articles. This is because (1) we decided to count proteins only once if they appeared in different gel spots, (2) some proteins, although with different names, were shown to possess the same Uniprot accession number, and (3) some data were not provid…
N/A : proteins for which the UniProtKB accession number cited in the studies had become obsolete and could not be found anymore in the UniProtKB database.
aIf the protein name did not match the UniProtKB accession number provided in the article, we updated the protein name and added it, preceded by "Renamed as" in brackets.
bIn studies targeting specific proteins, if the investigated isoform or subunit was not specified by the authors, we chose the one which would best the study. The selected isoform/subunit is then specified in brackets.
cIn case of measured activity instead of abundance, "(activity)" is specified
