# Supplementary material for: Influence of Risk Factors for Male Infertility on Sperm Protein Composition
Source: Int J Mol Sci. 2021 Dec 6;22(23):13164. doi: 10.3390/ijms222313164 (PMC8658491; doi:10.3390/ijms222313164)
Supplement: Supplementary file 1 [file ijms-22-13164-s001.zip › Table S2 revised.xlsx]

## Sheet: Table S2
Table S2. Selected deregulated proteins in relation to male infertility risk factors according a fold change ≥1.5 or ≤ 0.66
Obesity
References	Species	Working sample	Protein namea	Gene name	Uniprot KB accession numberb	Protein variationc
Kriegel et al. 2009 [36]	Human	Progressive spermatozoa	Fibrinogen-like 1 precursor	FGL1 HFREP1	Q08830	Down
			Glutathione S-transferase omega-2	GSTO2	Q9H4Y5	Down
			Glyceraldehyde-3-phosphate dehydrogenase, testis-specific	GAPDHS GAPD2 GAPDH2 GAPDS HSD-35 HSD35	O14556	Up
			Glycerol kinase 3, testis specific 1	GK3P GKP3 GKTB	Q14409	Up
			Lysozyme-like protein 1 precursor	LYZL1 LYC2 UNQ648/PRO1278	Q6UWQ5	Down
			Outer dense fiber protein 1	ODF1 HSPB10 ODFP	Q14990	Down, Up
			Semenogelin-1 preproprotein	SEMG1 SEMG	P04279	Down
			Semenogelin-2	SEMG2	Q02383	Down
			Chromosome 9 open reading frame 24 (renamed as Spermatid-specific manchette-related protein 1)	SMRP1 C9orf24 CBE1	Q8NCR6	Down
Paasch et al. 2011 [40]	Human	Progressive spermatozoa	Actin, cytoplasmic 1	ACTB	P60709	Down
			Actin, cytoplasmic 2	ACTG1 ACTG	P63261	Down
			Clusterin	CLU APOJ CLI KUB1 AAG4	P10909	Down
			Lactotransferrin	LTF GIG12 LF	P02788	Down
			Prolactin-inducible protein	PIP GCDFP15 GPIP4	P12273	Down
			Semenogelin-1	SEMG1 SEMG	P04279	Down
			Beta-galactosidase-1-like protein	GLB1L UNQ229/PRO262	Q6UWU2	Up
Leisegang et al. 2014 [79]	Human	Seminal plasma	Insulin	INS	P01308	Up
			Leptin	LEP OB OBS	P41159	Up
Shi et al. 2014 [59]	Human	Spermatozoa	Protein-tyrosine Phosphatase 1B (renamed as Tyrosine-protein phosphatase non-receptor type 1)	PTPN1 PTP1B	P18031	Up
	Mouse	Spermatozoa	Protein-tyrosine Phosphatase 1B (renamed as Tyrosine-protein phosphatase non-receptor type 1)	Ptpn1	P35821	Up
Liu et al. 2015 [43]	Human	Spermatozoa	19 kDa protein (renamed as 60S ribosomal protein L24 (60S ribosomal protein L30))	RPL24	P83731	Down
			24 kDa protein (renamed as Transgelin-2 (Epididymis tissue protein Li 7e))	TAGLN2 KIAA0120 CDABP0035	P37802	Down
			26 kDa protein (renamed as Glutathione S-transferase Mu 2)	GSTM2 GST4	P28161	Down
			40S ribosomal protein S13	RPS13	P62277	Down
			40S ribosomal protein S3a	RPS3A FTE1 MFTL	P61247	Down
			40S ribosomal protein S6	RPS6 OK/SW-cl.2	P62753	Down
			40S ribosomal protein S9	RPS9	P46781	Down
			60S ribosomal protein L17	RPL17	P18621	Down
			Actin-related protein T2	ACTRT2 ARPM2	Q8TDY3	Down
			Adenine phosphoribosyltransferase	APRT	P07741	Down
			Aldehyde oxidase	AOX1 AO	Q06278	Down
			Aldose reductase (renamed as Aldo-keto reductase family 1 member B1)	AKR1B1 ALDR1 ALR2	P15121	Down
			Alpha-crystallin B chain	CRYAB CRYA2 HSPB5	P02511	Down
			Brain protein 44 (renamed as Mitochondrial pyruvate carrier 2)	MPC2 BRP44	O95563	Down
			BTB/POZ domain-containing protein KCTD14	KCTD14	Q9BQ13	Down
			Calicin	CCIN	Q13939	Down
			Carbonyl reductase [NADPH] 3	CBR3	O75828	Down
			Carboxymethylenebutenolidase homolog	CMBL	Q96DG6	Down
			Cathepsin D	CTSD CPSD	P07339	Down
			cDNA FLJ34642 fis, clone KIDNE2016918, highly similar to UROMODULIN (renamed as Uromodulin)	UMOD	P07911	Down
			cDNA FLJ60094, highly similar to F-actin capping protein subunit beta (renamed as F-actin-capping protein subunit beta)	CAPZB hCG_41078	B1AK88	Down
			Coatomer subunit beta'	COPB2	P35606	Down
			Coatomer subunit gamma-1	COPG1 COPG	Q9Y678	Down
			Coatomer subunit zeta-1	COPZ1 COPZ CGI-120 HSPC181	P61923	Down
			Cylicin-1	CYLC1 CYL CYL1	P35663	Down
			Cytochrome c oxidase subunit 5A, mitochondrial	COX5A	P20674	Down
			Cytoplasmic aconitate hydratase	ACO1 IREB1	P21399	Down
			D-3-phosphoglycerate dehydrogenase	PHGDH PGDH3	O43175	Down
			Dolichyl-diphosphooligosaccharide--protein glycosyltransferase subunit 1	RPN1	P04843	Down
			Dynactin 2 (renamed as Dynactin subunit 2)	DCTN2 DCTN50	Q13561	Down
			Electron transfer flavoprotein-ubiquinone oxidoreductase, mitochondrial	ETFDH	Q16134	Down
			Elongation factor 1-alpha 1	EEF1A1 EEF1A EF1A LENG7	P68104	Down
			Endoplasmic reticulum protein ERp29 (renamed as Endoplasmic reticulum resident protein 29)	ERP29 C12orf8 ERP28	P30040	Down
			Epoxide hydrolase 1	EPHX1 EPHX EPOX	P07099	Down
			FAM75-like protein C9orf79 (renamed as Spermatogenesis-associated protein 31E1)	SPATA31E1 C9orf79 FAM75E1	Q6ZUB1	Down
			FK506-binding protein 5	FKBP5 AIG6 FKBP51	Q13451	Down
			Fructose-bisphosphate aldolase C	ALDOC ALDC	P09972	Down
			Glyceraldehyde-3-phosphate dehydrogenase, testis-specific	GAPDHS GAPD2 GAPDH2 GAPDS HSD-35 HSD35	O14556	Down
			Glyoxylate reductase/hydroxypyruvate reductase	GRHPR GLXR MSTP035	Q9UBQ7	Down
			Guanine nucleotide-binding protein G(I)/G(S)/G(T) subunit beta-2	GNB2	P62879	Down
			hypothetical protein LOC284418 (renamed as Protein FAM71E2)	FAM71E2 C19orf16	Q8N5Q1	Down
			hypothetical protein LOC84226 (renamed as C2orf16 protein (Fragment))	C2orf16	A4QMX9	Down
			Integral membrane protein 2B	ITM2B BRI BRI2	Q9Y287	Down
			Integrin-linked protein kinase	ILK ILK1 ILK2	Q13418	Down
			Interferon-inducible GTPase 5	IRGC IIGP5 IRGC1	Q6NXR0	Down
			Isoform 1 of Abhydrolase domain-containing protein 14B	ABHD14B CIB	Q96IU4-1	Down
			Isoform 1 of Alpha-1,3-mannosyltransferase ALG2	ALG2 UNQ666/PRO1298	Q9H553-1	Down
			Isoform 1 of CCR4-NOT transcription complex subunit 1	CNOT1 CDC39 KIAA1007 NOT1 AD-005	A5YKK6-1	Down
			Isoform 1 of Cytoskeleton-associated protein 4	CKAP4	Q07065-1	Down
			Isoform 1 of Cytosolic Fe-S cluster assembly factor NUBP1	NUBP1 NBP NBP1	P53384-1	Down
			Isoform 1 of Dynein heavy chain 3, axonemal	DNAH3 DNAHC3B	Q8TD57-1	Down
			Isoform 1 of E3 ubiquitin-protein ligase RNF138	RNF138 NARF HSD-4 HSD4	Q8WVD3-1	Down
			Isoform 1 of Elongator complex protein 3	ELP3	Q9H9T3-1	Down
			Isoform 1 of Endoplasmic reticulum-Golgi intermediate compartment protein 1	ERGIC1 ERGIC32 KIAA1181 HT034	Q969X5-1	Down
			Isoform 1 of Heat shock cognate 71 kDa protein	HSPA8 HSC70 HSP73 HSPA10	P11142-1	Down
			Isoform 1 of Lambda-crystallin homolog	CRYL1 CRY	Q9Y2S2-1	Down
			Isoform 1 of LETM1 and EF-hand domain-containing protein 1, mitochondrial (renamed as Mitochondrial proton/calcium exchanger protein)	LETM1	O95202-1	Down
			Isoform 1 of Myosin-9	MYH9	P35579-1	Down
			Isoform 1 of Nephronectin	NPNT EGFL6L POEM UNQ295/PRO334	Q6UXI9-1	Down
			Isoform 1 of Pyruvate dehydrogenase E1 component subunit beta, mitochondrial	PDHB PHE1B	P11177-1	Down
			Isoform 1 of Serine/threonine-protein kinase TAO1	TAOK1 KIAA1361 MAP3K16 MARKK	Q7L7X3-1	Down
			Isoform 1 of Tomoregulin-2	TMEFF2 HPP1 TENB2 TPEF UNQ178/PRO204	Q9UIK5-1	Down
			Isoform 1 of Uncharacterized protein C1orf194 (renamed as Protein C1orf194)	C1orf194	Q5T5A4-1	Down
			Isoform 2 of Fatty aldehyde dehydrogenase (renamed as Aldehyde dehydrogenase family 3 member A2)	ALDH3A2 ALDH10 FALDH	P51648-2	Down
			Isoform 2 of Mannose-1-phosphate guanyltransferase beta	GMPPB	Q9Y5P6-2	Down
			Isoform 2 of Polyamine-modulated factor 1-binding protein 1	PMFBP1	Q8TBY8-2	Down
			Isoform 2 of Septin-2	SEPTIN2 DIFF6 KIAA0158 NEDD5 SEPT2	Q15019-2	Down
			Isoform B of Annexin A13	ANXA13 ANX13	P27216-2	Down
			Isoform Complexed of Arginyl-tRNA synthetase, cytoplasmic (renamed as Arginine--tRNA ligase, cytoplasmic (Arginyl-tRNA synthetase))	RARS1 RARS	P54136-1	Down
			KIAA1683 isoform a (renamed as IQ domain-containing protein N)	IQCN KIAA1683	Q9H0B3	Down
			Kinesin-1 heavy chain	KIF5B KNS KNS1	P33176	Down
			Macrophage-capping protein	CAPG AFCP MCP	P40121	Down
			Methyltransferase-like protein 7A	METTL7A PRO0066 UNQ1902/PRO4348	Q9H8H3	Down
			Nucleosome assembly protein 1-like 1	NAP1L1 NRP	P55209	Down
			Phospholipase A2, membrane associated	PLA2G2A PLA2B PLA2L RASF-A	P14555	Down
			Poly(rC) binding protein 2 isoform a (renamed as Poly(rC)-binding protein 2)	PCBP2	Q15366	Down
			Proteasome subunit beta type-2	PSMB2	P49721	Down
			Proteasome subunit beta type-6	PSMB6 LMPY Y	P28072	Down
			Protein transport protein Sec61 subunit beta	SEC61B	P60468	Down
			Putative adenosylhomocysteinase 3 (renamed as Adenosylhomocysteinase 3)	AHCYL2 KIAA0828	Q96HN2	Down
			Putative FAM75-like protein FLJ44082 (renamed as Spermatogenesis-associated protein 31D3)	SPATA31D3 FAM75D3	P0C874	Down
			Putative uncharacterized protein APOD (renamed as Apolipoprotein D (Fragment))	APOD	C9JF17	Down
			Putative uncharacterized protein ATP2A3 (renamed as Sarcoplasmic/endoplasmic reticulum calcium ATPase 3)	ATP2A3	Q93084-6	Down
			Putative uncharacterized protein DKFZp686M24262 (renamed as Medium-chain specific acyl-CoA dehydrogenase, mitochondrial)	DKFZp686M24262	Q5HYG7	Down
			Putative uncharacterized protein PITRM1 (renamed as Presequence protease, mitochondrial)	PITRM1 KIAA1104 MP1 PREP	Q5JRX3-1	Down
			Rho GTPase-activating protein 1	ARHGAP1 CDC42GAP RHOGAP1	Q07960	Down
			Rhophilin-2	RHPN2	Q8IUC4	Down
			Ribosomal protein L10 (Fragment)	N/A	Q5HY50.1	Down
			Ribosomal protein S6 kinase alpha-3	RPS6KA3 ISPK1 MAPKAPK1B RSK2	P51812	Down
			small inducible cytokine subfamily E, member 1 isoform b precursor (renamed as Aminoacyl tRNA synthase complex-interacting multifunctional protein 1	AIMP1 EMAP2 SCYE1	Q12904	Down
			Tektin-5	TEKT5	Q96M29	Down
			Testis-expressed sequence 15 protein (renamed as Testis-expressed protein 15 (Cancer/testis antigen 42))	TEX15	Q9BXT5	Down
			Thioredoxin domain-containing protein 17	TXNDC17 TXNL5	Q9BRA2	Down
			Transforming protein RhoA	RHOA ARH12 ARHA RHO12	P61586	Down
			Translocation protein SEC62	SEC62 TLOC1	Q99442	Down
			Transmembrane and coiled-coil domain-containing protein 2	TMCO2	Q7Z6W1	Down
			Transmembrane emp24 domain-containing protein 10	TMED10 TMP21	P49755	Down
			Transmembrane protein C9orf144B (renamed as Protein FAM205A)	FAM205A C9orf144B	Q6ZU69	Down
			Tubulin--tyrosine ligase-like protein 12	TTLL12 KIAA0153	Q14166	Down
			V-type proton ATPase catalytic subunit A	ATP6V1A ATP6A1 ATP6V1A1 VPP2	P38606	Down
			Antileukoproteinase	SLPI WAP4 WFDC4	P03973	Up
			Beta-defensin 121	DEFB121 DEFB21	Q5J5C9	Up
			Epididymal secretory protein E3-beta (Human epididymis-specific protein 3-beta)	EDDM3B FAM12B HE3B UNQ6412/PRO21187	P56851	Up
			Isoform 1 of DAZ-associated protein 1	DAZAP1	Q96EP5-1	Up
			Isoform 1 of Nucleoporin NUP188 homolog	NUP188 KIAA0169	Q5SRE5-1	Up
			Isoform 1 of Peroxisomal membrane protein 11C	PEX11G PEX11C	Q96HA9-1	Up
			Isoform 4 of Dystrophin	DMD	P11532-4	Up
			Isoform 4 of Extracellular matrix protein 1	ECM1	Q16610-4	Up
			Isoform Mitochondrial of Cysteine desulfurase, mitochondrial (renamed as Cysteine desulfurase, mitochondrial)	NFS1 NIFS HUSSY-08	Q9Y697-1	Up
			Peroxisomal membrane protein 11B	PEX11B	O96011	Up
			PNAS-117 (renamed as Alternative protein MKKS)	MKKS hCG_40237	Q9HB66	Up
			Prostaglandin D2 synthase 21kDa (renamed as Glutathione-independent PGD synthase)	PTGDS	Q5SQ11	Up
			Ras-related protein Rab-10	RAB10	P61026	Up
			Solute carrier family 2, facilitated glucose transporter member 5	SLC2A5 GLUT5	P22732	Up
			T-complex protein 1 subunit zeta-2	CCT6B	Q92526	Up
			Testican-1	SPOCK1 SPOCK TIC1 TICN1	Q08629	Up
			TRIP12 protein (renamed as E3 ubiquitin-protein ligase TRIP12))	TRIP12 KIAA0045 ULF	Q14669	Up
			Uncharacterized protein FLJ43738	N/A	Q6ZUG5	Up
Binder et al. 2015 [80]	Mouse	seminal plasma	Insulin	Ins1 Ins-1	P01325	Up
			Leptin (Obesity factor)	Lep Ob	P41160	Up
Fan et al. 2018 [54]	Human	Seminal plasma	Interleukin-6 (IL-6) (B-cell stimulatory factor 2) (BSF-2) (CTL differentiation factor) (CDF) (Hybridoma growth factor) (Interferon beta-2) (IFN-beta-2)	IL6 IFNB2	P05231	Up
			Tumor necrosis factor (Cachectin) (TNF-alpha) (Tumor necrosis factor ligand superfamily member 2) (TNF-a) [Cleaved into: Tumor necrosis factor, membrane form (N-terminal fragment) (NTF); Intracellular domain 1 (ICD1); Intracellular domain 2 (ICD2); C-domain 1; C-domain 2; Tumor necrosis factor, soluble form]	TNF TNFA TNFSF2	P01375	Up
Ferigolo et al. 2019 [33]	Human	Seminal plasma	Beta-microseminoprotein	MSMB PRSP	P08118	Down
			BPI fold-containing family B member 2	BPIFB2 BPIL1 C20orf184 LPLUNC2 UNQ2489/PRO5776	Q8N4F0	Down
			Brain-specific serine protease 4	PRSS22 BSSP4 PRSS26 SP001LA UNQ302/PRO343	Q9GZN4	Down
			CD81 antigen	CD81 TAPA1 TSPAN28	P60033	Down
			Cysteine-rich secretory protein LCCL domain-containing 1	CRISPLD1 CRISP10 LCRISP1 UNQ342/PRO541	Q9H336	Down
			Phospholipase A2, membrane associated	PLA2G2A PLA2B PLA2L RASF-A	P14555	Down
			Protein dopey-2	DOP1B C21orf5 DOPEY2 KIAA0933	Q9Y3R5	Down
			SH3 domain-binding glutamic acid-rich-like protein	SH3BGRL	O75368	Down
			Toll-interacting protein	TOLLIP	Q9H0E2	Down
			SEC14-like protein 3	SEC14L3	Q9UDX4	in obese men only
			ADP-ribosyl cyclase/cyclic ADP-ribose hydrolase 1	CD38	P28907	Up
			Alpha-1-antitrypsin	SERPINA1 AAT PI PRO0684 PRO2209	P01009	Up
			Alpha-1B-glycoprotein	A1BG	P04217	Up
			Apolipoprotein A-I	APOA1	P02647	Up
			Arrestin domain-containing protein 1	ARRDC1	Q8N5I2	Up
			Beta-defensin 129	DEFB129 C20orf87 DEFB29 UNQ5794/PRO19599	Q9H1M3	Up
			Beta-hexosaminidase subunit alpha	HEXA	P06865	Up
			CD44 antigen (renamed as Metalloproteinase inhibitor 2)	TIMP2	P16035	Up
			Ceruloplasmin	CP	P00450	Up
			Complement C3	C3 CPAMD1	P01024	Up
			Complement C4-B	C4B CO4 CPAMD3; C4B_2	P0C0L5	Up
			Complement factor B	CFB BF BFD	P00751	Up
			Contactin-associated protein-like 2	CNTNAP2 CASPR2 KIAA0868	Q9UHC6	Up
			Glutathione reductase, mitochondrial	GSR GLUR GRD1	P00390	Up
			Haptoglobin	HP	P00738	Up
			Histone H2A type 1-J	H2AC14 H2AFE HIST1H2AJ	Q99878	Up
			Ig alpha-1 chain C region	IGHA1	P01876	Up
			Ig alpha-2 chain C region	IGHA2	P01877	Up
			Ig gamma-1 chain C region	IGHG1	P01857	Up
			Ig heavy chain V-III region BRO	IGHV3-13	P01766	Up
			Ig kappa chain C region	IGKC	P01834	Up
			Ig kappa chain V-II region TEW	IGKV2D-28	P01615	Up
			Ig kappa chain V-III region GOL	IGKV3-20	P01619	Up
			Ig lambda chain V-IV region Hil	IGLV3-25	P01717	Up
			Ig lambda-3 chain C regions	IGLC3	P0DOY3	Up
			Immunoglobulin J chain	JCHAIN IGCJ IGJ	P01591	Up
			Immunoglobulin lambda-like polypeptide 5	IGLL5	B9A064	Up
			Myeloperoxidase	MPO	P05164	Up
			Neutrophil defensin 3	DEFA3 DEF3	P59666	Up
			Neutrophil gelatinase-associated lipocalin	LCN2 HNL NGAL	P80188	Up
			Olfactomedin-4	OLFM4 GW112 UNQ362/PRO698	Q6UX06	Up
			Plasma protease C1 inhibitor	SERPING1 C1IN C1NH	P05155	Up
			Probable serine carboxypeptidase CPVL	CPVL VLP PSEC0124 UNQ197/PRO223	Q9H3G5	Up
			Prostate and testis expressed protein 4	PATE4	P0C8F1	Up
			Prostate stem cell antigen	PSCA UNQ206/PRO232	O43653	Up
			Protein S100-A8	S100A8 CAGA CFAG MRP8	P05109	Up
			Protein S100-A9	S100A9 CAGB CFAG MRP14	P06702	Up
			Semaphorin-3C	SEMA3C SEMAE	Q99985	Up
			Twisted gastrulation protein homolog 1	TWSG1 TSG PSEC0250	Q9GZX9	Up
Peng et al. 2019 [44]	Mouse	Spermatozoa	110 kDa cell membrane glycoprotein;Adhesion-regulating molecule 1;Proteasomal ubiquitin receptor ADRM1;Rpn13 homolog;Adrm1 protein	Adrm1 Gp110	Q9JKV1	Down
			1700029J11Rik protein;Novel protein (1700029J11Rik);RIKEN cDNA 1700029J11 gene;Putative uncharacterized protein	Fam209 1700029J11Rik	A2APA5	Down
			2810408A11Rik protein;Novel protein similar to protein phosphatase 1, regulatory (Inhibitor) subunit 2 Ppp1r2;Putative uncharacterized protein;RIKEN cDNA 2810408A11, isoform CRA_e	2810408A11Rik	A0JLP5	Down
			3-ketoacyl-CoA thiolase B, peroxisomal;Acetyl-CoA acyltransferase B;Beta-ketothiolase B;Peroxisomal 3-oxoacyl-CoA thiolase B;Putative uncharacterized protein;MCG21883, isoform CRA_e;3-ketoacyl-CoA thiolase A, peroxisomal;Acetyl-CoA acyltransferase A;Beta-ketothiolase A;Peroxisomal 3-oxoacyl-CoA thiolase A;Acaa1a protein;MCG21883, isoform CRA_b	Acaa1b Acaa1	Q8VCH0	Down
			33 kDa VAMP-associated protein;Vesicle-associated membrane protein-associated protein A	Vapa Vap33	Q9WV55	Down
			40S ribosomal protein S14;Ribosomal protein S14;Putative uncharacterized protein	Rps14	P62264	Down
			4933415F23Rik protein	Ppp1r14bl 4933415F23Rik	Q14BX6	Down
			55 kDa erythrocyte membrane protein;Membrane protein, palmitoylated 1;Membrane protein, palmitoylated;Putative uncharacterized protein	Mpp1	P70290	Down
			60S acidic ribosomal protein P1;MCG10168;Putative uncharacterized protein;Ribosomal protein, large, P1;Rplp1 protein	Rplp1	P47955	Down
			60S ribosomal protein L18;Ribosomal protein L18	Rpl18	P35980	Down
			60S ribosomal protein L23;Ribosomal protein L23;Ribosomal protein L23, isoform CRA_b	Rpl23	P62830	Down
			60S ribosomal protein L27	Rpl27	P61358	Down
			60S ribosomal protein L38;MCG13615, isoform CRA_a;MCG14541;MCG7366;Putative uncharacterized protein;Ribosomal protein L38	Rpl38	Q9JJI8	Down
			Acrosome formation-associated factor;Equatorin;Putative uncharacterized protein;Sperm-specific single transmembrane domain protein long form;Sperm-specific single transmembrane domain protein short form	Eqtn Afaf Mn9	Q9D9V2	Down
			Actin-like protein 7A;Actin-like-7-alpha;Testis-specific actin-2;Actin-like 7a	Actl7a Tact2	Q9QY84	Down
			Actin-like protein 9	Actl9 Actl7c	Q8CG27	Down
			Activator of G-protein signaling 2;Dynein light chain Tctex-type 1;T-complex testis-specific protein 1;TCTEX-1;Tctex-1;Putative uncharacterized protein;Dynlt1 protein	Dynlt1 Tctel1 Tctex-1 Tctex1	P51807	Down
			Acyl-Coenzyme A binding domain containing 7;Acyl-CoA-binding domain-containing protein 7	Acbd7	Q9D258	Down
			Acylamino-acid-releasing enzyme;Acylaminoacyl-peptidase;Acyl-peptide hydrolase	Apeh	Q8R146	Down
			Aldo-keto reductase family 7, member A5 (Aflatoxin aldehyde reductase);Aflatoxin B1 aldehyde reductase member 2;Succinic semialdehyde reductase	Akr7a2 Afar Akr7a5	Q8CG76	Down
			Alpha-2-HS-glycoprotein;Countertrypin;Fetuin-A;Alpha 2-Heremans-Schmid-glycoprotein;Putative uncharacterized protein;Alpha-2-HS-glycoprotein, isoform CRA_a	Ahsg Fetua	P29699	Down
			Alpha-SGT;Small glutamine-rich tetratricopeptide repeat-containing protein alpha;Putative uncharacterized protein;Small glutamine-rich tetratricopeptide repeat (TPR)-containing, alpha, isoform CRA_b	Sgta Sgt	Q8BJU0	Down
			Apolipoprotein A-I;Putative uncharacterized protein;Apoa1 protein;Apolipoprotein A1	Apoa1	Q00623	Down
			Arginine decarboxylase;Antizyme inhibitor 2;Arginine decarboxylase-like protein (renamed as Antizyme inhibitor 2)	Azin2	Q8BVM4	Down
			Beta-actin-like protein 2;Kappa-actin	Actbl2	Q8BFZ3	Down
			BolA-like protein 3;BolA-like 3 (E. coli);Putative uncharacterized protein	Bola3	Q8CEI1	Down
			Bradykinin;Kininogen-1;Kininogen-1 heavy chain;Kininogen-1 light chain	Kng1 Kng	O08677	Down
			Caltractin;Centrin-1	Cetn1 Calt	P41209	Down
			Casein kinase II subunit alpha;Casein kinase II alpha subunit;Putative uncharacterized protein;Casein kinase 2, alpha 1 polypeptide;Casein kinase II, alpha 1 polypeptide, isoform CRA_a;Casein kinase II, alpha 1 polypeptide, isoform CRA_b	Csnk2a1 Ckiia	Q60737	Down
			cDNA sequence BC048562;Putative uncharacterized protein	BC048562	Q80ZQ7	Down
			Cellular retinol-binding protein;Cellular retinol-binding protein I;Retinol-binding protein 1;Putative uncharacterized protein;Rbp1 protein;Retinol binding protein 1, cellular	Rbp1 Crbpi Rbp-1	Q00915	Down
			Centromere protein V;Proline-rich protein 6	Cenpv Prr6	Q9CXS4	Down
			Centrosome and spindle pole associated protein 1;Centrosome/spindle pole-associated protein 2;Centrosome/spindle pole-associated protein 3;Cspp1 protein	Cspp1 Cspp	B2RX88	Down
			Choline transporter-like protein 5;Solute carrier family 44 member 5;Solute carrier family 44, member 5	Slc44a5 Ctl5	Q5RJI2	Down
			Cylicin, basic protein of sperm head cytoskeleton 2;Putative uncharacterized protein	Cylc2	B1AWN8	Down
			Cysteine and glycine-rich protein 1;Cysteine-rich protein 1;Csrp1 protein;Cysteine and glycine-rich protein 1, isoform CRA_b;Putative uncharacterized protein	Csrp1 Crp1 Csrp	P97315	Down
			Dual specificity phosphatase 3 (Vaccinia virus phosphatase VH1-related);Dual specificity protein phosphatase 3;T-DSP11;Dual specificity phosphatase 3 (Vaccinia virus phosphatase VH1-related), isoform CRA_b;Putative uncharacterized protein	Dusp3	B1AQF4	Down
			Erythrocyte band 7 integral membrane protein;Protein 7.2b;Stomatin;Stomatin, isoform CRA_b;Putative uncharacterized protein;Stom protein	Stom Epb7.2 Epb72	P54116	Down
			Erythrocyte protein band 4.1;4.1R;Band 4.1;Protein 4.1;Protein 4.1R;Putative uncharacterized protein	Epb41 Epb4.1	A2A841	Down
			Ewing sarcoma breakpoint region 1;RNA-binding protein EWS;Putative uncharacterized protein;MCG14699, isoform CRA_c	Ewsr1	Q5SUS9	Down
			Family with sequence similarity 71, member D (Golgi-associated Rab2B interactor-like 2)	Fam71d GARI-L2	Q80W24	Down
			GDI-3;Guanosine diphosphate dissociation inhibitor 2;Rab GDP dissociation inhibitor beta;Putative uncharacterized protein	Gdi2 Gdi3	Q61598	Down
			Golgi-associated Rab2B interactor-like 4;MCG1029078	Fam71a GARI-L4	B7XG49	Down
			Histidine-rich glycoprotein HRG;Histidine-rich glycoprotein Hrg;Histidine-rich glycoprotein	Hrg	Q9ESB3	Down
			Histone H2A	H2al1a; H2al1c; H2al1d; H2al1f; H2al1g; H2al1h; H2al1i	Q5M8Q2	Down
			Histone H4	H4c1 Hist1h4a; H4c2 H4-53 Hist1h4b; H4c3 H4-12 Hist1h4c; H4c4 Hist1h4d; H4c6 Hist1h4f; H4c8 Hist1h4h; H4c9 Hist1h4i; H4c11 Hist1h4j; H4c12 Hist1h4k; Hist1h4m; H4c14 Hist2h4 Hist2h4a; H4f16 Hist4h4	P62806	Down
			HLA-B-associated transcript 3;Large proline-rich protein BAT3;Putative uncharacterized protein;Bat3 protein	Bag6 Bat3	Q9Z1R2	Down
			IQ and ubiquitin-like domain-containing protein	Iqub	Q8CDK3	Down
			Leucine zipper transcription factor-like protein 1	Lztfl1	Q9JHQ5	Down
			Lymphocyte antigen 6 complex locus protein G5b	Ly6g5b	Q8K1T4	Down
			Lymphocyte antigen 6 complex locus protein G5c	Ly6g5c	Q8K1T5	Down
			Macropain epsilon chain;Multicatalytic endopeptidase complex epsilon chain;Proteasome chain 6;Proteasome epsilon chain;Proteasome subunit beta type-5;Proteasome subunit X;Putative uncharacterized protein	Psmb5	O55234	Down
			Macropain zeta chain;Multicatalytic endopeptidase complex zeta chain;Proteasome subunit alpha type-5;Proteasome zeta chain;Proteasome subunit alpha type	Psma5	Q9Z2U1	Down
			Malic enzyme 2;NAD-dependent malic enzyme, mitochondrial;Malic enzyme	Me2	Q99KE1	Down
			MCG145317;Williams-Beuren syndrome critical region protein 25;Putative uncharacterized protein	Wbscr25	Q810H9	Down
			Mitochondrial import receptor subunit TOM6 homolog;Overexpressed breast tumor protein homolog;Translocase of outer membrane 6 kDa subunit homolog	Tomm6 Obtp Tom6	Q9CQN3	Down
			Mitsugumin-33B;Transmembrane protein 38B;Trimeric intracellular cation channel type B	Tmem38b D4Ertd89e Mg33b	Q9DAV9	Down
			Myosin regulatory light chain 2, smooth muscle isoform;Myosin regulatory light chain 9;Myosin regulatory light polypeptide 9;MCG5232;Myosin light polypeptide 9, regulatory	Myl9 Myrl2	Q9CQ19	Down
			PAI1 RNA-binding protein 1;Plasminogen activator inhibitor 1 RNA-binding protein;SERPINE1 mRNA-binding protein 1;Putative uncharacterized protein	Serbp1 Pairbp1	Q9CY58	Down
			Peptidyl-tRNA hydrolase 2, mitochondrial;Peptidyl-tRNA hydrolase 2;Peptidyl-tRNA hydrolase 2, isoform CRA_b	Ptrh2 Pth2	Q8R2Y8	Down
			Pierce 1;UPF0691 protein C9orf116 homolog;Novel protein (1700007K13Rik)		Q5BN45	Down
			Plasma membrane Ca++ transporting ATPase 4 splice variant b;Plasma membrane Ca++ transporting ATPase 4 variant x/b	Atp2b4	Q6Q477	Down
			PP2A subunit A isoform PR65-alpha;PP2A subunit A isoform R1-alpha;Serine/threonine-protein phosphatase 2A 65 kDa regulatory subunit A alpha isoform;Protein phosphatase 2 (Formerly 2A), regulatory subunit A (PR 65), alpha isoform;Putative uncharacterized protein	Ppp2r1a	Q76MZ3	Down
			Protein FAM24A	Fam24a	Q8CF27	Down
			Putative uncharacterized protein	4932415D10Rik	Q8CDI3	Down
			Putative uncharacterized protein	Gm7073 631784	Q3UXG0	Down
			Putative uncharacterized protein	Tsc22d4	Q3TCX6	Down
			Putative uncharacterized protein (renamed as Cylicin_N domain-containing protein (Fragment))	Cylc1	Q9CUM9	Down
			Putative uncharacterized protein (renamed as FAM75 domain-containing protein)	Spata31d1d	Q8C5W2	Down
			Putative uncharacterized protein (renamed as FAM75 domain-containing protein)	Spata31d1a	Q8CDS1	Down
			Putative uncharacterized protein (renamed as Testis-expressed 48)	Tex48 1700018C11Rik	Q9DA81	Down
			Putative uncharacterized protein NG8	NG8	O70357	Down
			Putative uncharacterized protein;PP2A subunit A isoform PR65-beta;PP2A subunit A isoform R1-beta;Serine/threonine-protein phosphatase 2A 65 kDa regulatory subunit A beta isoform	Ppp2r1b	Q3TTF6	Down
			Putative uncharacterized protein;RIKEN cDNA 2200002J24, isoform CRA_a	2200002J24Rik	Q9D807	Down
			Ran guanine nucleotide release factor;Ran-binding protein MOG1	Rangrf Mog1 Rangnrf	Q9JIB0	Down
			Ras-related protein Rab-8B;Rab8B;RAB8B, member RAS oncogene family;RAB8B, member RAS oncogene family, isoform CRA_c	Rab8b	P61028	Down
			Ras-related protein Ral-A;V-ral simian leukemia viral oncogene homolog A (Ras related);V-ral simian leukemia viral oncogene homolog A (Ras related), isoform CRA_b;Putative uncharacterized protein	Rala Ral Ral-a	P63321	Down
			RIKEN cDNA 4921517D21 gene;Putative uncharacterized protein;Novel protein (4921517D21Rik);RIKEN cDNA 4921517D21	Actl11 4921517D21Rik	Q14BL3	Down
			Secretory carrier-associated membrane protein 1;Putative uncharacterized protein;Secretory carrier membrane protein 1	Scamp1	Q8K021	Down
			Serine/threonine-protein phosphatase 4 regulatory subunit 1;Putative uncharacterized protein	Ppp4r1	Q8K2V1	Down
			Serum albumin;Albumin 1;Putative uncharacterized protein	Alb Alb-1 Alb1	P07724	Down
			TCTEX5 long isoform;TCTEX5 isoform 2;Protein phosphatase 1 regulatory subunit 11;T-complex testis expressed protein 5;TCTEX5 isoform 3;TCTEX5 isoform 1 (renamed as E3 ubiquitin-protein ligase PPP1R11)	Ppp1r11	A5A4Y9	Down
			Testis specific basic protein	BC051142 Tesb RP23-24A13.2-003	A2CG24	Down
			TLC domain-containing protein 4 (Transmembrane protein 56)	Tlcd4 Tmem56	Q8CGF5	Down
			Translin-associated factor X-interacting protein 1;Tsnaxip1 protein	Tsnaxip1 Txi1	Q99P25	Down
			Transmembrane protein ENSP00000340100 homolog (renamed as Protein FAM205C, isoforme 1)	Fam205c	Q80YD3-1	Down
			Transmembrane protein ENSP00000340100 homolog;Putative uncharacterized protein (renamed as Protein FAM205C, isoforme 2)	BC049635 (Fam205c)	Q80YD3-2	Down
			Uncharacterized protein C1orf185 homolog;Novel protein;Putative uncharacterized protein	N/A	Q9CPZ3	Down
			Uncharacterized protein C2orf53 homolog (renamed as Proline-rich protein 30)	Prr30	Q9D9B7	Down
			Uncharacterized protein C9orf128 homolog (renamed as Protein FAM221B)	Fam221b	Q8C627-1	Down
			UPF0740 protein C1orf192 homolog (renamed as Protein Flattop (Cilia- and flagella-associated protein 126))	Cfap126 Fltp	Q6P8X9	Down
			60S ribosomal protein L15;Ribosomal protein L15	Rpl15	Q9CZM2	Up
			8 kDa dynein light chain;Dynein light chain 1, cytoplasmic;Dynein light chain LC8-type 1;Protein inhibitor of neuronal nitric oxide synthase;Putative uncharacterized protein	Dynll1 Dlc1 Dncl1 Dnclc1	P63168	Up
			Acyl-CoA dehydrogenase family member 10;Putative uncharacterized protein	Acad10	Q8K370	Up
			ATP synthase subunit f, mitochondrial	Atp5mf Atp5j2	P56135	Up
			BCS1-like protein;Mitochondrial chaperone BCS1	Bcs1l	Q9CZP5	Up
			Beta-defensin 2;Defensin, beta 2;Defensin beta 2;MCG6977	Defb2	P82020	Up
			Caltractin isoform 1;Centrin-2;Centrin 2	Cetn2 Calt	Q9R1K9	Up
			Cation channel sperm-associated protein subunit gamma;Putative uncharacterized protein	Catsperg2 Catsperg	C6KI89	Up
			Cell cycle control protein 50A;Transmembrane protein 30A	Tmem30a Cdc50a D9Wsu20e	Q8VEK0	Up
			CII-4;QPs3;Succinate dehydrogenase [ubiquinone] cytochrome b small subunit, mitochondrial;Succinate dehydrogenase complex subunit D;Succinate-ubiquinone oxidoreductase cytochrome b small subunit;Succinate-ubiquinone reductase membrane anchor subunit;Putative uncharacterized protein	Sdhd	Q9CXV1	Up
			Coiled-coil domain-containing protein 42A;Coiled-coil domain containing 42	Ccdc42	Q5SV66	Up
			Complex I-15 kDa;NADH dehydrogenase [ubiquinone] iron-sulfur protein 5;NADH-ubiquinone oxidoreductase 15 kDa subunit;NADH dehydrogenase (Ubiquinone) Fe-S protein 5	Ndufs5	Q99LY9	Up
			Complex I-B12;NADH dehydrogenase [ubiquinone] 1 beta subcomplex subunit 3;NADH-ubiquinone oxidoreductase B12 subunit;Putative uncharacterized protein	Ndufb3	Q9CQZ6	Up
			Complex I-B14.7;NADH dehydrogenase [ubiquinone] 1 alpha subcomplex subunit 11;NADH-ubiquinone oxidoreductase subunit B14.7	Ndufa11	Q9D8B4	Up
			Complex I-B9;NADH dehydrogenase [ubiquinone] 1 alpha subcomplex subunit 3;NADH-ubiquinone oxidoreductase B9 subunit	Ndufa3	Q9CQ91	Up
			Complex I-SGDH;NADH dehydrogenase [ubiquinone] 1 beta subcomplex subunit 5, mitochondrial;NADH-ubiquinone oxidoreductase SGDH subunit;Putative uncharacterized protein	Ndufb5	Q9CQH3	Up
			Cytochrome c oxidase polypeptide VIIc;Cytochrome c oxidase subunit 7C, mitochondrial;Cytochrome c oxidase, subunit VIIc;MCG10796;MCG1735, isoform CRA_a	Cox7c Cox7c1	P17665	Up
			EF-hand calcium-binding domain-containing protein 1	Efcab1	Q9D3N2	Up
			Enoyl-CoA hydratase 1;Enoyl-CoA hydratase, mitochondrial;Short-chain enoyl-CoA hydratase	Echs1	Q8BH95	Up
			Fumarylacetoacetate hydrolase domain-containing protein 1;Putative uncharacterized protein	Fahd1 MNCb-4134	Q8R0F8	Up
			Hydroxysteroid (17-beta) dehydrogenase 10;Putative uncharacterized protein;17beta-hydroxysteroid dehydrogenase type 10/short chain L-3-hydroxyacyl-CoA dehydrogenase;17-beta-hydroxysteroid dehydrogenase 10;3-hydroxy-2-methylbutyryl-CoA dehydrogenase;3-hydroxyacyl-CoA dehydrogenase type II;3-hydroxyacyl-CoA dehydrogenase type-2;Endoplasmic reticulum-associated amyloid beta-peptide-binding protein;M…	Hsd17b10	A2AFQ2	Up
			Inositol 1,4,5-trisphosphate receptor type 2;Inositol 1,4,5-trisphosphate type V receptor;IP3 receptor isoform 2;Type 2 inositol 1,4,5-trisphosphate receptor;Inositol 1,4,5-triphosphate receptor 2;Putative uncharacterized protein;Inositol trisphosphate receptor type 2;Itpr2 protein	Itpr2 Itpr5	Q9Z329	Up
			Isochorismatase domain-containing protein 2A, mitochondrial;Isoc2a protein	Isoc2a Isoc2	P85094	Up
			Long-chain acyl-CoA synthetase 1;Long-chain-fatty-acid--CoA ligase 1;Acyl-CoA synthetase long-chain family member 1;Putative uncharacterized protein	Acsl1 Acsl2 Facl2	P41216	Up
			Mitochondrial 18 kDa protein;Putative uncharacterized protein;Novel protein;RIKEN cDNA 1700020C11;1700020C11Rik	Mtfp1 Mtp18	Q9CRB8	Up
			Muscarinic acetylcholine receptor M2;Chrm2 protein	Chrm2 Chrm-2	Q9ERZ4	Up
			NADH dehydrogenase subunit 4;NADH-ubiquinone oxidoreductase chain 4;Putative uncharacterized protein	Mtnd4 mt-Nd4 Nd4	P03911	Up
			Oxidoreductase HTATIP2;Putative uncharacterized protein;HIV-1 tat interactive protein 2, homolog (Human);HIV-1 tat interactive protein 2, homolog (Human), isoform CRA_a;Htatip2 protein	Htatip2 Cc3 Tip30	Q9Z2G9	Up
			p47 protein;RuvB-like 2;Putative uncharacterized protein;RuvB-like protein 2	Ruvbl2	Q9WTM5	Up
			Predicted;Testase-6	Adam34l Adam36 EG384813 Gm5346	Q7M766	Up
			Protein TANC2;Tetratricopeptide repeat, ankyrin repeat and coiled-coil domain-containing protein 2;Tetratricopeptide repeat, ankyrin repeat and coiled-coil containing 2	Tanc2 Kiaa1148	A2A690	Up
			Putative uncharacterized protein	Pebp4 1700081D17Rik	Q9D9L9	Up
			Putative uncharacterized protein	Epp13 EG627821 Gm6792	Q8C5A6	Up
			Putative uncharacterized protein (renamed as FAM75 domain-containing protein)	Htra1 Htra Prss11	Q9R118	Up
			Putative uncharacterized protein;WAP four-disulfide core domain 6A	Wfdc6a Gm122	Q3UW55	Up
			Signal-induced proliferation-associated 1-like protein 1;Putative uncharacterized protein;Sipa1l1 protein	Sipa1l1 Kiaa0440	Q8C0T5	Up
			Tubulin beta-3 chain;Putative uncharacterized protein	Tubb3	Q9ERD7	Up
			WAP four-disulfide core domain 6B;WAP6b	Wfdc6b Wfdc6	F6ULY1	Up
Pini et al. 2020 [49]	Human	Progressive spermatozoa	[Pyruvate dehydrogenase (acetyl-transferring)] kinase isozyme 1, mitochondrial	PDK1 PDHK1	Q15118	Down
			5'(3')-deoxyribonucleotidase, cytosolic type	NT5C DNT1 UMPH2	Q8TCD5	Down
			Actin-related protein 2	ACTR2 ARP2	P61160	Down
			Acyl-coenzyme A thioesterase THEM4	THEM4 CTMP	Q5T1C6	Down
			ADP-ribosylation factor-like protein 2	ARL2	P36404	Down
			AFG1-like ATPase	AFG1L AFG1 LACE1	Q8WV93	Down
			Alcohol dehydrogenase class-3	ADH5 ADHX FDH	P11766	Down
			Alpha-soluble NSF attachment protein	NAPA SNAPA	P54920	Down
			Aminopeptidase B	RNPEP APB	Q9H4A4	Down
			Ankyrin repeat domain-containing protein 45	ANKRD45	Q5TZF3	Down
			Barrier-to-autointegration factor-like protein	BANF2 BAFL C20orf179	Q9H503	Down
			Bifunctional purine biosynthesis protein PURH	ATIC PURH OK/SW-cl.86	P31939	Down
			Casein kinase I isoform gamma-1	CSNK1G1	Q9HCP0	Down
			Cilia- and flagella-associated protein 221	CFAP221 PCDP1	Q4G0U5	Down
			Ciliogenesis-associated TTC17-interacting protein	CATIP C2orf62	Q7Z7H3	Down
			Coiled-coil domain-containing protein 189	CCDC189 C16orf93	A1A4V9	Down
			CTD nuclear envelope phosphatase 1	CTDNEP1 DULLARD	O95476	Down
			Cysteine protease ATG4B	ATG4B APG4B AUTL1 KIAA0943	Q9Y4P1	Down
			Cytoplasmic aconitate hydratase	ACO1 IREB1	P21399	Down
			DCN1-like protein 1	DCUN1D1 DCN1 DCUN1L1 RP42 SCCRO	Q96GG9	Down
			Diphosphomevalonate decarboxylase	MVD MPD	P53602	Down
			Elongation factor 1-beta	EEF1B2 EEF1B EF1B	P24534	Down
			Eukaryotic initiation factor 4A-II	EIF4A2 DDX2B EIF4F	Q14240	Down
			Eukaryotic translation initiation factor 3 subunit F	EIF3F EIF3S5	O00303	Down
			Eukaryotic translation initiation factor 3 subunit K	EIF3K EIF3S12 ARG134 HSPC029 MSTP001 PTD001	Q9UBQ5	Down
			Exportin-T	XPOT	O43592	Down
			Fumarylacetoacetate hydrolase domain-containing protein 2A	FAHD2A CGI-105	Q96GK7	Down
			Glutathione synthetase	GSS	P48637	Down
			Glyoxalase domain-containing protein 4	GLOD4 C17orf25 CGI-150 My027	Q9HC38	Down
			GTP-binding protein SAR1b	SAR1B SARA2 SARB	Q9Y6B6	Down
			Histidine triad nucleotide-binding protein 1	HINT1 HINT PKCI1 PRKCNH1	P49773	Down
			Importin subunit alpha-3	KPNA4 QIP1	O00629	Down
			Leucine-rich repeat-containing protein 23	LRRC23 LRPB7	Q53EV4	Down
			Leucine-rich repeat-containing protein 74A	LRRC74A C14orf166B LRRC74	Q0VAA2	Down
			Leukotriene A-4 hydrolase	LTA4H LTA4	P09960	Down
			Mitochondrial pyruvate carrier 1	MPC1 BRP44L CGI-129 HSPC040 PNAS-115	Q9Y5U8	Down
			NEDD8-conjugating enzyme Ubc12	UBE2M UBC12	P61081	Down
			Protein FAM92A	FAM92A FAM92A1	A1XBS5	Down
			Protein SGT1 homolog	SUGT1	Q9Y2Z0	Down
			Protein-glutamate O-methyltransferase (renamed as Damage-control phosphatase ARMT1)	ARMT1 C6orf211	Q9H993	Down
			Ras-related protein Rab-18	RAB18	Q9NP72	Down
			Ras-related protein Ral-A	RALA RAL	P11233	Down
			Rho-related GTP-binding protein RhoN	RND2 ARHN RHO7	P52198	Down
			Ribonuclease inhibitor	RNH1 PRI RNH	P13489	Down
			Ribosyldihydronicotinamide dehydrogenase [quinone]	NQO2 NMOR2	P16083	Down
			S-formylglutathione hydrolase	ESD	P10768	Down
			S-phase kinase-associated protein 1	SKP1 EMC19 OCP2 SKP1A TCEB1L	P63208	Down
			Serine/threonine-protein phosphatase 2A 65 kDa regulatory subunit A alpha isoform	PPP2R1A	P30153	Down
			Serologically defined colon cancer antigen 3 (renamed as Endosome-associated-trafficking regulator 1)	ENTR1 SDCCAG3	Q96C92	Down
			STE20-related kinase adapter protein alpha	STRADA LYK5 STRAD	Q7RTN6	Down
			Tetratricopeptide repeat protein 12	TTC12	Q9H892	Down
			Thioredoxin domain-containing protein 17	TXNDC17 TXNL5	Q9BRA2	Down
			Ubiquitin carboxyl-terminal hydrolase 14	USP14 TGT	P54578	Down
			Ubiquitin carboxyl-terminal hydrolase 4	USP4 UNP UNPH	Q13107	Down
			Ubiquitin conjugation factor E4 A	UBE4A KIAA0126	Q14139	Down
			UBX domain-containing protein 6	UBXN6 UBXD1 UBXDC2	Q9BZV1	Down
			Uncharacterized protein C1orf100	C1orf100	Q5SVJ3	Down
			Unconventional myosin-VI	MYO6 KIAA0389	Q9UM54	Down
			UPF0577 protein KIAA1324 (renamed as Endosome/lysosome-associated apoptosis and autophagy regulator 1)	ELAPOR1 EIG121 KIAA1324 UNQ2426/PRO4985	Q6UXG2	Down
			Vacuolar protein sorting-associated protein 28 homolog	VPS28	Q9UK41	Down
			NADH dehydrogenase [ubiquinone] iron-sulfur protein 2, mitochondrial	NDUFS2	O75306	Uo
			Nucleoporin NUP53	NUP35 MP44 NUP53	Q8NFH5	Up
			Outer dense fiber protein 3-like protein 2	ODF3L2 C19orf19	Q3SX64	Up
			Protein jagunal homolog 1	JAGN1	Q8N5M9	Up
			Secretory carrier-associated membrane protein 2	SCAMP2	O15127	Up
Carvalho et al. 2021 [34]	Rat	Pellet after centrifugation (no purification)	Phosphoglycerate kinase	RGD1560402	M0R6Y8	Down
			Ras-related protein rab-2 A	Rab2a	F1LP82	Down
			outer dense fiber of sperm tails 2, isoform CRA_e	Odf2 rCG_45844	G3V7X0	Down
			Protein/nucleic acid deglycase DJ-1 (renamed as Parkinson disease protein 7 homolog)	Park7 Cap1	O88767	Down
			Tubulin beta-4B chain	Tubb4b	Q6P9T8	Down
			Keratin, type II cytoskeletal 5	Krt5 LOC102551453	A0A0G2K509	Down
			Cytochrome c, testis-specific	Cyct	P10715	Down
			Outer dense fiber protein 2	Odf2	A0A0H2UHM4	Up
			ATP synthase subunit beta	Atp5f1b Atp5b rCG_42467	G3V6D3	Up
			Tubulin beta chain	Tubb4b	G3V7C6	Up
			Glyceraldehyde-3-phosphate dehydrogenase	Gapdhs rCG_54229	B1WBQ8	Up
			CD177 antigen-like	LOC100909620 LOC100909662 LOC102553892 RGD1564380	M0R4W1	Up
			DLAT protein (renamed as Dihydrolipoyllysine-residue acetyltransferase component of pyruvate dehydrogenase complex, mitochondrial)	Dlat	P08461	Up
			Globin c2	Hba-a2 Glnc2 Hba2 rCG_34342	A0A0G2JSV6	Up
			Lysozyme c (renamed as Sperm acrosome membrane-associated protein 3)	Spaca3 Lyzc Spaca3_predicted rCG_32436	F1M6E7	Up
Diabetes
References	Species	Working sample	Protein namea	Gene name	Uniprot KB accession numberb	Protein variationc
Kriegel et al. 2009 [36]	Human	Progressive spermatozoa	Importin subunit beta-3; Karyopherin beta-3; ran-binding protein 5 (renamed as Importin-5)	IPO5 KPNB3 RANBP5	O00410	Down
			semenogelin 1 preproprotein	SEMG1 SEMG	P04279	Down
			Prolactin-induced protein	PIP GCDFP15 GPIP4	P12273	Down, Up
			A-kinase anchoring protein 4	AKAP4 AKAP82	Q5JQC9	Up
			Annexin A1	ANXA1 ANX1 LPC1	P04083	Up
			ferritin, Mitochondrial	FTMT	Q8N4E7	Up
			Hydroxysteroid (17-beta) deshydrogenase 10 isoform 1	HSD17B10 ERAB HADH2 MRPP2 SCHAD SDR5C1 XH98G2	Q99714	Up
Paasch et al. 2011 [40]	Human	Protein in type-1 diabetic patients. Progressive spermatozoa	beta-Galactosidase-1-like protein	GLB1L UNQ229/PRO262	Q6UWU2	Down
			gamma-Glutamyl hydrolase	GGH	Q92820	Down
			Clusterin	CLU APOJ CLI KUB1 AAG4	P10909	Up
			Lactotransferrin	LTF GIG12 LF	P02788	Up
			Outer dense fiber protein 1	ODF1 HSPB10 ODFP	Q14990	Up
			Semenogelin-1	SEMG1 SEMG	P04279	Up
			Sperm protein associated with the nucleus on the X chromosome B/F	SPANXC	Q9NY87	Up
			Zinc finger protein 813	ZNF813	Q6ZN06	Up
		Protein in type-2 diabetic patients. Progressive spermatozoa	A-kinase anchor protein 4	AKAP4 AKAP82	Q5JQC9	Down
			Aconitate hydratase, mitochondrial	ACO2	Q99798	Down
			Acrosin	ACR ACRS	P10323	Down
			Acrosin-binding protein	ACRBP	Q8NEB7	Down
			Acrosomal protein SP-10	ACRV1	P26436	Down
			Actin-related protein M1	ACTRT3 ARPM1	Q9BYD9	Down
			beta-galactosidase-1-like protein	GLB1L UNQ229/PRO262	Q6UWU2	Down
			BAG family molecular chaperone regulator 5	BAG5 KIAA0873	Q9UL15	Down
			Calicin	CCIN	Q13939	Down
			Cytoplasmic aconitate hydratase	ACO1 IREB1	P21399	Down
			EF-hand domain-containing protein 1	EFHC1	Q5JVL4	Down
			Elongation factor Tu, mitochondrial	TUFM	P49411	Down
			Fructose-bisphosphate aldolase A	ALDOA ALDA	P04075	Down
			gamma-glutamyl hydrolase	GGH	Q92820	Down
			Izumo sperm-egg fusion protein 4	IZUMO4 C19orf36 UNQ831/PRO1758	Q1ZYL8	Down
			Long-chain-fatty-acid--CoA ligase 1	ACSL1 FACL1 FACL2 LACS LACS1 LACS2	P33121	Down
			Lysosomal Pro-X carboxypeptidase	PRCP PCP	P42785	Down
			NADH-cytochrome b5 reductase 2	CYB5R2	Q6BCY4	Down
			Outer dense fiber protein 2	ODF2	Q5BJF6	Down
			Pyruvate dehydrogenase E1 component subunit a, testis-specific form, mitochondrial	PDHA2 PDHAL	P29803	Down
			Sperm acrosome-associated protein 5	SPACA5 LYZL5 SPACA5A UNQ6288/PRO20753; SPACA5B	Q96QH8	Down
			Succinyl-CoA:3-ketoacid-coenzyme A transferase 1, mitochondrial	OXCT1 OXCT SCOT	P55809	Down
			Tubulin alpha-3C/D chain	TUBA3C TUBA2	P0DPH7	Down
			Tubulin beta-2C chain	TUBB4B TUBB2C	P68371	Down
			Uncharacterized protein C1orf56 (renamed as Protein MENT)	MENT C1orf56 UNQ547/PRO1104	Q9BUN1	Down
			Heat shock-related 70 kDa protein 2	HSPA2	P54652	Down, Up
			Semenogelin-1	SEMG1 SEMG	P04279	Down, Up
			Clusterin	CLU APOJ CLI KUB1 AAG4	P10909	Up
			Phosphoglycerate kinase 2	PGK2 PGKB	P07205	Up
			Copper homeostasis protein cutC homolog	CUTC CGI-32	Q9NTM9	Up
			Epididymal secretory protein E3-beta	EDDM3B FAM12B HE3B UNQ6412/PRO21187	P56851	Up
			Glutathione S-transferase Mu 3	GSTM3 GST5	P21266	Up
			L-amino-acid oxidase	IL4I1 FIG1 UNQ636/PRO1265	Q96RQ9	Up
			Lactadherin	MFGE8	Q08431	Up
			Lactotransferrin	LTF GIG12 LF	P02788	Up
			Nucleoside diphosphate kinase B	NME2 NM23B	P22392	Up
			Outer dense fiber protein 1	ODF1 HSPB10 ODFP	Q14990	Up
			Prolactin-inducible protein	PIP GCDFP15 GPIP4	P12273	Up
			Serum amyloid P-component	APCS PTX2	P02743	Up
An et al. 2018 [47]	Human	Pellet after centrifugation (no purification)	Serpin B3	SERPINB3 SCCA SCCA1	P29508	Up
			Olfactomedin-4	OLFM4 GW112 UNQ362/PRO698	Q6UX06	Up
			Keratin, type II cytoskeletal 1	KRT1 KRTA	P04264	Up
			Keratin, type II cytoskeletal 6A	KRT6A K6A KRT6D	P02538	Up
			Keratin, type I cytoskeletal 16	KRT16 KRT16A	P08779	Up
			Keratin, type I cytoskeletal 10	KRT10 KPP	P13645	Up
			Keratin, type I cytoskeletal 14	KRT14	P02533	Up
			Vimentin	VIM	P08670	Up
			Serum amyloid P-component	APCS PTX2	P02743	Up
			Keratin, type I cytoskeletal 13	KRT13	P13646	Up
			Eukaryotic translation initiation factor 3 subunit F	EIF3F EIF3S5	O00303	Up
			Heterogeneous nuclear ribonucleoprotein D0	HNRNPD AUF1 HNRPD	Q14103	Up
			Sperm surface protein Sp17	SPA17 SP17	Q15506	Up
			Myeloblastin	PRTN3 MBN	P24158	Up
			Keratin, type II cytoskeletal 5	KRT5	P13647	Up
			Keratin, type II cytoskeletal 4	KRT4 CYK4	P19013	Up
			Transketolase-like protein 2	TKTL2	Q9H0I9	Up
			Ras-related protein Rab-2A	RAB2A RAB2	P61019	Up
			V-type proton ATPase subunit E 2	ATP6V1E2 ATP6E1 ATP6EL2 ATP6V1EL2	Q96A05	Up
			Heat shock protein beta-1	HSPB1 HSP27 HSP28	P04792	Up
			Maestro heat-like repeat-containing protein family member 7	MROH7 C1orf175 HEATR8	Q68CQ1	Up
			Dolichyl-diphosphooligosaccharide--protein glycosyltransferase 48 kDa subunit	DDOST KIAA0115 OST48 OK/SW-cl.45	P39656	Up
			Triosephosphate isomerase	TPI1 TPI	P60174	Up
			S-phase kinase-associated protein 1	SKP1 EMC19 OCP2 SKP1A TCEB1L	P63208	Up
			Alpha-crystallin B chain	CRYAB CRYA2 HSPB5	P02511	Up
			ATP synthase subunit beta, mitochondrial	ATP5F1B ATP5B ATPMB ATPSB	P06576	Up
			Prostaglandin-H2 D-isomerase	PTGDS PDS	P41222	Down
			Serum albumin	ALB GIG20 GIG42 PRO0903 PRO1708 PRO2044 PRO2619 PRO2675 UNQ696/PRO1341	P02768	Down
			Epididymal secretory protein E1	NPC2 HE1	P61916	Down
			Alpha-1-antitrypsin	SERPINA1 AAT PI PRO0684 PRO2209	P01009	Down
Carvalho et al. 2021 [34]	Rat	Washed with centrifugation	Outer dense fiber protein 2	Odf2	A0A0H2UHM4	Down
			Phosphoglycerate kinase	RGD1560402	M0R6Y8	Down
			ATP synthase subunit beta	Atp5f1b Atp5b rCG_42467	G3V6D3	Down
			Tubulin beta chain	Tubb4b	G3V7C6	Down
			Glyceraldehyde-3-phosphate dehydrogenase	Gapdhs rCG_54229	B1WBQ8	Down
			outer dense fiber of sperm tails 2, isoform CRA_e	Odf2 rCG_45844	G3V7X0	Down
			Protein/nucleic acid deglycase DJ-1 (renamed as Parkinson disease protein 7 homolog)	Park7 Cap1	O88767	Down
			CD177 antigen-like	LOC100909620 LOC100909662 LOC102553892 RGD1564380	M0R4W1	Down
			Tubulin beta-4B chain	Tubb4b	Q6P9T8	Down
			Keratin, type II cytoskeletal 5	Krt5 LOC102551453	A0A0G2K509	Down
			Lysozyme c (renamed as Sperm acrosome membrane-associated protein 3)	Spaca3 Lyzc Spaca3_predicted rCG_32436	F1M6E7	Down
			Cytochrome c, testis-specific	Cyct	P10715	Down
			Ras-related protein rab-2 A	Rab2a	F1LP82	Up
			DLAT protein (renamed as Dihydrolipoyllysine-residue acetyltransferase component of pyruvate dehydrogenase complex, mitochondrial)	Dlat	P08461	Up
			Globin c2	Hba-a2 Glnc2 Hba2 rCG_34342	A0A0G2JSV6	Up
Tobacco smoking
References	Species	Working sample	Protein namea	Gene name	Uniprot KB accession numberb	Protein variationc
Gerhard et al. 1989 [60]	Human	Semen	Acrosin	ACR ACRS	P10323	Down (activity)
El Mulla et al. 1995 [120]	Human	Spermatozoa	Acrosin	ACR ACRS	P10323	Down (activity)
Zhang et al. 2000 [114]	Human	Seminal plasma	superoxide dismutase	SOD1	P00441	Down
Kiziler et al. 2007 [115]	Human	Seminal plasma	gluthatione-S-transferase	GSTA1	P08263 (selected)	Down (activity)
Elshal et al. 2009 [116]	Human	Seminal plasma	superoxide dismutase	SOD1	P00441	Down (activity)
			Catalase	CAT	P04040	Down (activity)
Kumosani et al. 2008 [61]	Human	Seminal plasma	Plasma membrane Ca2+-ATPase	ATP2B4 ATP2B2 MXRA1	P23634 (selected)	Down (activity)
El-Megely and Ali 2011 [53]	Human	Seminal liquid	Fas/Apo-1 (renamed as Tumor necrosis factor receptor superfamily member 6)	FAS APT1 FAS1 TNFRSF6	P25445	Up
			Caspase 3	CASP3 CPP32	P42574	Up (activity)
Ghaffari et al. 2013 [62]	Human	Semen (pellet)	creatine kinase	CKM CKMM	P06732 (selected)	Down (activity)
Yu et al. 2013 [117]	Human	Seminal plasma	superoxide dismutase	SOD1	P00441	Down (activity)
Chen et al. 2015 [35]	Mouse	Spermatozoa	Fructose-bisphosphate aldolase A (EC 4.1.2.13) (Aldolase 1) (Muscle-type aldolase)	Aldoa	P05064	Up
			1700065I17Rik (renamed as Testis specific expressed protein 7)	Tex43 1700065I17Rik Tseg7	C9W8M4	Up
			60 kDa heat shock protein, mitochondrial (EC 5.6.1.7) (60 kDa chaperonin) (Chaperonin 60) (CPN60) (HSP-65) (Heat shock protein 60) (HSP-60) (Hsp60) (Mitochondrial matrix protein P1)	Hspd1 Hsp60	P63038	Up
			Adenylate kinase isoenzyme 1 (AK 1) (EC 2.7.4.3) (EC 2.7.4.6) (ATP-AMP transphosphorylase 1) (ATP:AMP phosphotransferase) (Adenylate monophosphate kinase) (Myokinase)	Ak1	Q9R0Y5	Up
			Glutathione S-transferase Mu 2	Gstm2	P15626	Up
			Nebulin-related-anchoring protein (N-RAP)	Nrap	Q80XB4	Up
			Outer dense fiber protein 1	Odf1	Q61999	Up
			Peroxiredoxin-1 (EC 1.11.1.24) (Macrophage 23 kDa stress protein) (Osteoblast-specific factor 3) (OSF-3) (Thioredoxin peroxidase 2) (Thioredoxin-dependent peroxide reductase 2) (Thioredoxin-dependent peroxiredoxin 1)	Prdx1	P35700	Up
			Sulfotransferase 1C2 (ST1C2) (EC 2.8.2.-)	Sult1c2	Q9D939	Up
			Tubulin beta-4B chain (Tubulin beta-2C chain)	Tubb2c	P68372	Up
			ATP synthase subunit alpha, mitochondrial (ATP synthase F1 subunit alpha)	ATP5a1	Q03265	Down
			Citrate synthase, mitochondrial (EC 2.3.3.1) (Citrate (Si)-synthase)	Cs	Q9CZU6	Down
			Cytochrome b5 domain-containing protein 1	Cyb5d1	Q5NCY3	Down
			Glycerol-3-phosphate dehydrogenase, mitochondrial (GPD-M) (GPDH-M) (EC 1.1.5.3) (Protein TISP38)	Gpd2	Q64521	Down
			NADH dehydrogenase [ubiquinone] 1 beta subcomplex subunit 10 (Complex I-PDSW) (CI-PDSW) (NADH-ubiquinone oxidoreductase PDSW subunit)	Ndufb10	Q9DCS9	Down
			Outer dense fiber protein 2 (84 kDa outer dense fiber protein) (Cenexin) (Outer dense fiber of sperm tails protein 2)	Odf2	A3KGV1	Down
			Phospholipid hydroperoxide glutathione peroxidase (PHGPx) (EC 1.11.1.12) (Glutathione peroxidase 4) (GPx-4) (GSHPx-4)	Gpx4	O70325	Down
			Pyruvate dehydrogenase E1 component subunit alpha, testis-specific form, mitochondrial (EC 1.2.4.1) (PDHE1-A type II)	Pdha2	P35487	Down
			Speriolin (Spermatogenesis and centriole-associated protein 1) (Spermatogenic cell-specific Cdc20-binding protein)	Spatc1	Q148B6	Down
			Sperm mitochondrial-associated cysteine-rich protein	Smcp	P15265	Down
			Spermatogenesis-associated protein 22	spata22	Q5SV06	Down
			Tubulin alpha-3 chain (Alpha-tubulin 3/7) (Alpha-tubulin isotype M-alpha-3/7) (Tubulin alpha-3/alpha-7 chain) [Cleaved into: Detyrosinated tubulin alpha-3 chain]	Tuba3b	P05214	Down
Antoniassi et al. 2016 [48]	Human	Seminal plasma	Mammaglobin-B (Lacryglobin) (Lipophilin-C) (Mammaglobin-2) (Secretoglobin family 2A member 1)	SCGB2A1	O75556	absent
			Immunoglobulin lambda constant 3 (Ig lambda chain C region DOT) (Ig lambda chain C region NEWM) (Ig lambda-3 chain C regions)	IGLC3	P0DOY3	Up
			Immunoglobulin heavy constant alpha 1 (Ig alpha-1 chain C region) (Ig alpha-1 chain C region BUR) (Ig alpha-1 chain C region TRO)	IGHA1	P01876	Up
			Apolipoprotein A-I (Apo-AI) (ApoA-I) (Apolipoprotein A1) [Cleaved into: Proapolipoprotein A-I (ProapoA-I); Truncated apolipoprotein A-I (Apolipoprotein A-I(1-242))]	APOA1	P02647	Up
			Protein S100-A9 (Calgranulin-B) (Calprotectin L1H subunit) (Leukocyte L1 complex heavy chain) (Migration inhibitory factor-related protein 14) (MRP-14) (p14) (S100 calcium-binding protein A9)	S100A9	P06702	Up
			Alpha-1-acid glycoprotein 1 (AGP 1) (Orosomucoid-1) (OMD 1)	ORM1	P02763	Up
			Neutrophil gelatinase-associated lipocalin (NGAL) (25 kDa alpha-2-microglobulin-related subunit of MMP-9) (Lipocalin-2) (Oncogene 24p3) (Siderocalin) (p25)	LCN2	P80188	Up
			Prolargin (Proline-arginine-rich end leucine-rich repeat protein)	PRELP	P51888	Down
			Poly(rC)-binding protein 1 (Alpha-CP1) (Heterogeneous nuclear ribonucleoprotein E1) (hnRNP E1) (Nucleic acid-binding protein SUB2.3)	PCBP1	Q15365	Down
			Bile salt-activated lipase (BAL) (EC 3.1.1.13) (EC 3.1.1.3) (EC 3.1.1.6) (Bile salt-stimulated lipase) (BSSL) (Bucelipase) (Carboxyl ester lipase) (Cholesterol esterase) (Pancreatic lysophospholipase) (Sterol esterase)	CEL	P19835	Down
			Carbonyl reductase [NADPH] 1 (EC 1.1.1.184) (15-hydroxyprostaglandin dehydrogenase [NADP(+)]) (EC 1.1.1.196) (EC 1.1.1.197) (20-beta-hydroxysteroid dehydrogenase) (NADPH-dependent carbonyl reductase 1) (Prostaglandin 9-ketoreductase) (PG-9-KR) (Prostaglandin-E(2) 9-reductase) (EC 1.1.1.189) (Short chain dehydrogenase/reductase family 21C member 1)	CBR1	P16152	Down
			Phospholipase A2, membrane associated (EC 3.1.1.4) (GIIC sPLA2) (Group IIA phospholipase A2) (Non-pancreatic secretory phospholipase A2) (NPS-PLA2) (Phosphatidylcholine 2-acylhydrolase 2A)	PLA2G2A	P14555	Down
			CD44 antigen (CDw44) (Epican) (Extracellular matrix receptor III) (ECMR-III) (GP90 lymphocyte homing/adhesion receptor) (HUTCH-I) (Heparan sulfate proteoglycan) (Hermes antigen) (Hyaluronate receptor) (Phagocytic glycoprotein 1) (PGP-1) (Phagocytic glycoprotein I) (PGP-I) (CD antigen CD44)	CD44	P16070	Down
			MAM domain-containing protein 2 (MAM domain-containing proteoglycan) (Mamcan)	MAMDC2	Q7Z304	Down
			Epididymal secretory protein E3-alpha (Human epididymis-specific protein 3-alpha) (HE3-alpha)	EDDM3A	Q14507	Down
			G-protein coupled receptor 64 (renamed as Adhesion G-protein coupled receptor G2)	ADGRG2 GPR64 HE6 TM7LN2	Q8IZP9	Down
			Probable serine carboxypeptidase CPVL (EC 3.4.16.-) (Carboxypeptidase, vitellogenic-like) (Vitellogenic carboxypeptidase-like protein) (VCP-like protein) (hVLP)	CPVL	Q9H3G5	Down
			Beta-galactosidase (EC 3.2.1.23) (Acid beta-galactosidase) (Lactase) (Elastin receptor 1)	GLB1	P16278	Down
			Collagen alpha-1(XVIII) chain [Cleaved into: Endostatin; Non-collagenous domain 1 (NC1)]	COL18A1	P39060	Down
			Fatty acid synthase (EC 2.3.1.85) (Type I fatty acid synthase) [Includes: [Acyl-carrier-protein] S-acetyltransferase (EC 2.3.1.38); [Acyl-carrier-protein] S-malonyltransferase (EC 2.3.1.39); 3-oxoacyl-[acyl-carrier-protein] synthase (EC 2.3.1.41); 3-oxoacyl-[acyl-carrier-protein] reductase (EC 1.1.1.100); 3-hydroxyacyl-[acyl-carrier-protein] dehydratase (EC 4.2.1.59); Enoyl-[acyl-carrier-protein]…	FASN	P49327	Down
			Galectin-3 (Gal-3) (35 kDa lectin) (Carbohydrate-binding protein 35) (CBP 35) (Galactose-specific lectin 3) (Galactoside-binding protein) (GALBP) (IgE-binding protein) (L-31) (Laminin-binding protein) (Lectin L-29) (Mac-2 antigen)	LGALS3	P17931	Down
			Endoplasmin (94 kDa glucose-regulated protein) (GRP-94) (Heat shock protein 90 kDa beta member 1) (Tumor rejection antigen 1) (gp96 homolog)	HSP90B1	P14625	Down
Cui et al. 2016 [55]	Human	Spermatozoa	Acrosin	ACR ACRS	P10323	Down (activity)
			Checkpoint kinase 1	CHEK1 CHK1	O14757	Down
Aboulmaouahib et al. 2018 [119]	Human	Spermatozoa	Catalase	CAT	P04040	Up (activity)
			superoxide dismutase	SOD1	P00441	Up (activity)
			glutathione reductase	GSR GLUR GRD1	P00390 (selected)	Up (activity)
Bisphenol-A exposure
References	Species	Working sample	Protein namea	Gene name	Uniprot KB accession numberb	Protein variationc
Rahman et al. 2015 [135]	Mouse	Spermatozoa	beta-Actin	Actb	P60710 (selected)	Down
			Peroxiredoxin-5, mitochondrial	Prdx5 Prdx6	P99029	Up
			Glutathione peroxidase 4	Gpx4	O70325	Up
			Glyceraldehyde-3-phosphate dehydrogenase, testis-specific	Gapdhs	Q64467	Up
			Succinate deshydrogenase	Sdhb	P21912	Up
Barbonetti et al. 2016 [63]	Human	Spermatozoa	Caspase 3	CASP3 CPP32	P42574	Up (activity)
			Caspase 9	CASP9 MCH6	P55211	Up (activity)
Rahman et al. 2016 [50]	Mouse	Spermatozoa	ATP synthase subunit d, mitochondrial	Atp5pd Atp5h	Q9DCX2	Down
			ATP synthase subunit O, mitochondrial	Atp5po Atp5o D12Wsu28e	Q9DB20	Down
			Trifunctional enzyme subunit alpha, mitochondrial	Hadha	Q8BMS1	Down
			Cytochrome c oxidase subunit 6A1, mitochondrial	Cox6a1 Cox6al	P43024	Down
			Phosphoglycerate mutase 2	Pgam2	O70250	Down
			fatty acid-binding protein 9	Oxct2a	Q9JJN4	Down
			Isochorismatase domain-containing protein 2A, mitochondrial	Isoc2a Isoc2	P85094	Down
			Ropporin-1	Ropn1	Q9ESG2	Down
			Actin, cytoplasmic 1	Actb	P60710	Down
			Fatty acid-binding protein 9	Fabp9 Perf15 Tlbp	O08716	Down
			Outer dense fiber protein 2	Odf2 Odf84	A3KGV1	Down
			Prohibitin	Phb	P67778	Down
			Serine/threonine-protein phosphatase PP1-alpha catalytic subunit	Ppp1ca Ppp1a	P62137	Down
			Dynein light chain 1, axonemal	Dnal1 Dnalc1	Q05A62	Down
			Glutathione S-transferase Mu 5	Gstm5 Fsc2 Gstm3	P48774	Down
			Glyceraldehyde-3-phosphate dehydrogenase, testis-specific	Gapdhs	Q64467	Up
			Adenylate kinase 2, mitochondrial isoform	Ak2	Q9WTP6	Up
			Succinate dehydrogenase Ip subunit	Sdhb	Q9CQA3	Up
			Cytochrome b-c1 complex subunit Rieske, mitochondrial	Uqcrfs1	Q9CR68	Up
			Isoaspartyl peptidase/L-asparaginase	Asrgl1	Q8C0M9	Up
			Sperm surface protein Sp17	Spa17 Sp17	Q62252	Up
			Glutathione peroxidase 4	Gpx4	O70325	Up
			Peroxiredoxin-5, mitochondrial	Prdx5 Prdx6	P99029	Up
Rahman et al. 2017 [130]	Mouse	Spermatozoa	Phospholipid hydroperoxide glutathione peroxidase	Gpx4	O70325	Down
			ATP synthase subunit O, mitochondrial	Atp5po Atp5o D12Wsu28e	Q9DB20	Down
			Glutathione S-transferase Mu 5	Gstm5 Fsc2 Gstm3	P48774	Down
			NADH dehydrogenase [ubiquinone] 1 alpha subcomplex subunit 10, mitochondrial	Ndufa10	Q99LC3	Down
			Isoaspartyl peptidase/L-asparaginase	Asrgl1	Q8C0M9	Up
			Superoxide dismutase [Mn], mitochondrial	Sod2 Sod-2	P09671	Up
Rahman et al. 2018 [131]	Mouse	Capacitated spermatozoa	Cytochrome c1, heme protein, mitochondrial	Cyc1	Q9D0M3	Down
			Steroid dehydrogenase (renamed as (3R)-3-hydroxyacyl-CoA dehydrogenase)	Hsd17b8	P50171	Down
			Adenylate kinase isozyme 2, mitochondrial	Ak2	Q9WTP6	Down
			NADH dehydrogenase [ubiquinone] 1 alpha subcomplex subunit 13	Ndufa13 Grim19	Q9ERS2	Down
			ATP synthase subunit O, mitochondrial	Atp5po Atp5o D12Wsu28e	Q9DB20	Down
			Actin-related protein T3	Actrt3 Arpm1	Q8BXF8	Down
			Outer dense fiber protein	Odf2 Odf84	A3KGV1	Down
			Peroxiredoxin-5, mitochondrial	Prdx5 Prdx6	P99029	Down
			Superoxide dismutase [Mn], mitochondrial	Sod2 Sod-2	P09671	Down
			Prohibitin	Phb	P67778	Down
			Ras-related protein Rab-2A	Rab2a Rab2	P53994	Down
			Cytochrome c oxidase subunit 5B, mitochondrial	Cox5b	P19536	Up
			Triosephosphate isomerase	Tpi1 Tpi	P17751	Up
			Ropporin-1	Ropn1	Q9ESG2	Up
			Fatty acid-binding protein 9	Fabp9 Perf15, Tlbp	O08716	Up
Rahman et al. 2020 [143]	Mouse	Spermatozoa	Lactate deshydrogenase	Ldha Ldh-1 Ldh1	P06151 (selected)	Up
Proteins in common in several studies for a same risk factor are highlighted in blue (obesity), yellow (diabetes), green (tobacco smoking) or orange (BPA exposure)
N/A : proteins for which the UniProtKB accession number cited in the studies had become obsolete and could not be found anymore in the UniProtKB database.
aIf the protein name did not match the UniProtKB accession number provided in the article, we updated the protein name and added it, preceded by "Renamed as" in brackets.
bIn studies targeting specific proteins, if the investigated isoform or subunit was not specified by the authors, we chose the one which would best the study. The selected isoform/subunit is then specified in brackets.
cIn case of measured activity instead of abundance, "(activity)" is specified
