# Supplementary material for: Influence of Risk Factors for Male Infertility on Sperm Protein Composition
Source: Int J Mol Sci. 2021 Dec 6;22(23):13164. doi: 10.3390/ijms222313164 (PMC8658491; doi:10.3390/ijms222313164)
Supplement: Supplementary file 1 [file ijms-22-13164-s001.zip › Table S3.xlsx]

## Sheet: Table S3
Table S3. List of enriched GO biological processes for deregulated sperm proteins in human and rodent in relation to obesity, diabetes, tobacco smoking and bisphenol-A (BPA) exposure
Obesity-Human
Term	Count	P-Value
innate immune response	19	1.3e-05
proteolysis	18	0.0003
cell-cell adhesion	15	1.3e-05
complement activation, classical pathway	14	4.8e-10
oxidation-reduction process	14	0.045
immune response	13	0.0091
complement activation	11	1.9e-07
defense response to bacterium	11	2e-05
receptor-mediated endocytosis	11	0.00016
Fc-gamma receptor signaling pathway involved in phagocytosis	10	4.2e-05
ER to Golgi vesicle-mediated transport	10	0.00025
intracellular protein transport	10	0.0038
translational initiation	9	0.00042
Fc-epsilon receptor signaling pathway	9	0.0023
retina homeostasis	8	7.3e-07
antibacterial humoral response	8	1.4e-06
glucose metabolic process	8	2.5e-05
viral transcription	8	0.00065
negative regulation of endopeptidase activity	8	0.001
aging	8	0.0058
regulation of immune response	8	0.0087
positive regulation of B cell activation	7	8.3e-07
phagocytosis, engulfment	7	5.3e-06
B cell receptor signaling pathway	7	6.9e-05
nuclear-transcribed mRNA catabolic process, nonsense-mediated decay	7	0.0046
positive regulation of NF-kappaB transcription factor activity	7	0.0078
protein folding	7	0.03
phagocytosis, recognition	6	2.7e-05
cellular oxidant detoxification	6	0.0021
SRP-dependent cotranslational protein targeting to membrane	6	0.0076
platelet degranulation	6	0.011
cellular protein metabolic process	6	0.019
autophagy	6	0.03
vesicle-mediated transport	6	0.048
defense response to fungus	5	0.00038
actin cytoskeleton reorganization	5	0.0032
retrograde vesicle-mediated transport, Golgi to ER	5	0.022
positive regulation of cell growth	5	0.024
positive regulation of protein kinase B signaling	5	0.024
defense response to Gram-positive bacterium	5	0.025
neuron projection development	5	0.041
positive regulation of respiratory burst	4	4.2e-05
acute-phase response	4	0.014
platelet aggregation	4	0.016
positive regulation of nitric oxide biosynthetic process	4	0.018
cellular iron ion homeostasis	4	0.019
intracellular transport of virus	4	0.028
positive regulation of osteoblast differentiation	4	0.043
COPII vesicle coating	4	0.045
mitochondrial acetyl-CoA biosynthetic process from pyruvate	3	0.0024
negative regulation of lipid storage	3	0.0045
glomerular filtration	3	0.0057
cell junction assembly	3	0.01
chaperone-mediated protein complex assembly	3	0.012
regulation of cytoskeleton organization	3	0.025
glutathione derivative biosynthetic process	3	0.033
positive regulation of JAK-STAT cascade	3	0.033
intra-Golgi vesicle-mediated transport	3	0.048
coagulation	2	0.026
formaldehyde catabolic process	2	0.026
mitochondrial pyruvate transmembrane transport	2	0.026
neutrophil aggregation	2	0.026
mitochondrial pyruvate transport	2	0.038
positive regulation of serine-type endopeptidase activity	2	0.038
positive regulation of STAT protein import into nucleus	2	0.038
chemokine production	2	0.038
regulation of skeletal muscle contraction by regulation of release of sequestered calcium ion	2	0.038
regulation of peroxisome size	2	0.038
Obesity-Rodent
Term	Count	P-Value
transport	23	0.00015
oxidation-reduction process	13	0.00022
metabolic process	8	0.011
protein complex assembly	4	0.0051
fatty acid beta-oxidation	3	0.022
actin cytoskeleton reorganization	3	0.031
negative regulation of ERK1 and ERK2 cascade	3	0.047
regulation of intestinal cholesterol absorption	2	0.026
regulation of sodium ion transmembrane transport	2	0.031
positive regulation by host of viral genome replication	2	0.036
Diabetes-Human
Term	Count	P-Value
metabolic process	6	0.00048
negative regulation of apoptotic process	6	0.031
Tissue homeostasis*	5	1.7e-05
cytoskeleton organization	5	0.0035
single fertilization	4	0.0015
movement of cell or subcellular component	4	0.0045
platelet degranulation	4	0.0074
cellular protein metabolic process	4	0.011
lipid metabolic process	4	0.023
tricarboxylic acid cycle	3	0.0056
glycolytic process	3	0.0076
keratinocyte differentiation	3	0.035
epidermis development	3	0.043
negative regulation of viral process	2	0.023
xenobiotic catabolic process	2	0.027
citrate metabolic process	2	0.027
hemidesmosome assembly	2	0.045
chaperone-mediated protein complex assembly	2	0.049
Diabetes-Rodent
Term	Count	P-Value
glucose metabolic process	2	0.033
response to hydrogen peroxide	2	0.039
Tobacco smoking-Human
Term	Count	P-Value
response to drug	6	0.00018
innate immune response	5	0.0069
negative regulation of apoptotic process	5	0.0083
cellular oxidant detoxification	4	0.00026
receptor-mediated endocytosis	4	0.0044
extrinsic apoptotic signaling pathway in absence of ligand	3	0.0017
response to reactive oxygen species	3	0.0022
response to hydrogen peroxide	3	0.0037
glutathione metabolic process	3	0.0045
epithelial cell differentiation	3	0.0069
activation of cysteine-type endopeptidase activity involved in apoptotic process	3	0.0096
platelet degranulation	3	0.014
metabolic process	3	0.036
response to hypoxia	3	0.038
response to hydrostatic pressure	2	0.0071
keratan sulfate catabolic process	2	0.021
cellular response to ATP	2	0.023
regulation of extrinsic apoptotic signaling pathway via death domain receptors	2	0.03
cell aging	2	0.044
positive regulation of B cell activation	2	0.045
phagocytosis, recognition	2	0.049
Tobacco smoking-Rodent
Term	Count	P-Value
oxidation-reduction process	5	0.0039
ATP biosynthetic process	2	0.023
tricarboxylic acid cycle	2	0.028
ATP metabolic process	2	0.039
microtubule-based process	2	0.04
glutathione metabolic process	2	0.048
BPA-exposure-Rodent
Term	Count	P-Value
oxidation-reduction process	10	9.6e-07
mitochondrial ATP synthesis coupled proton transport	3	1.6e-05
gluconeogenesis	3	0.00084
metabolic process	6	0.0009
glycolytic process	3	0.0016
ATP metabolic process	3	0.002
response to drug	5	0.0023
glutathione metabolic process	3	0.003
mitochondrial electron transport, cytochrome c to oxygen	2	0.02
response to oxidative stress	3	0.02
transport	8	0.027
respiratory electron transport chain	2	0.031
ATP synthesis coupled proton transport	2	0.037
response to immobilization stress	2	0.044
carbohydrate metabolic process	3	0.046
The enrichment analysis was performed with Fisher's exact test using DAVID.
For each list, the genome corresponding to the species was used as the background.
Enrichment with a p-value<0.05 was considered significant.
*The term retrieved by the GO analysis was "Retina homeostatis" but was manually curated to "Tissue homeostasis", an ancestor GO term which is more relevent to the proteins included in this category
